# Supplementary material
Source: PubMed Central journal article supplement (PMC10246505)
Supplement: NIHMS1895533-supplement-Supplemental_Information.pdf [file NIHMS1895533-supplement-Supplemental_Information.pdf]

---

**Supplementary information**

---

**Intestinal microbiota signatures of clinical response and immune-related adverse events in melanoma patients treated with anti-PD-1**

---

In the format provided by the authors and unedited

## **SUPPLEMENTARY INFORMATION**

### **Intestinal Microbiota Signatures of Clinical Response and Immune-related Adverse Events in Melanoma Patients treated with anti-PD-1**

# Supplementary Fig. 1 | Analysis of microbiome composition in progressor vs non-progressor patients treated with anti-PD-1 alone or anti-PD-1 + pegIFN

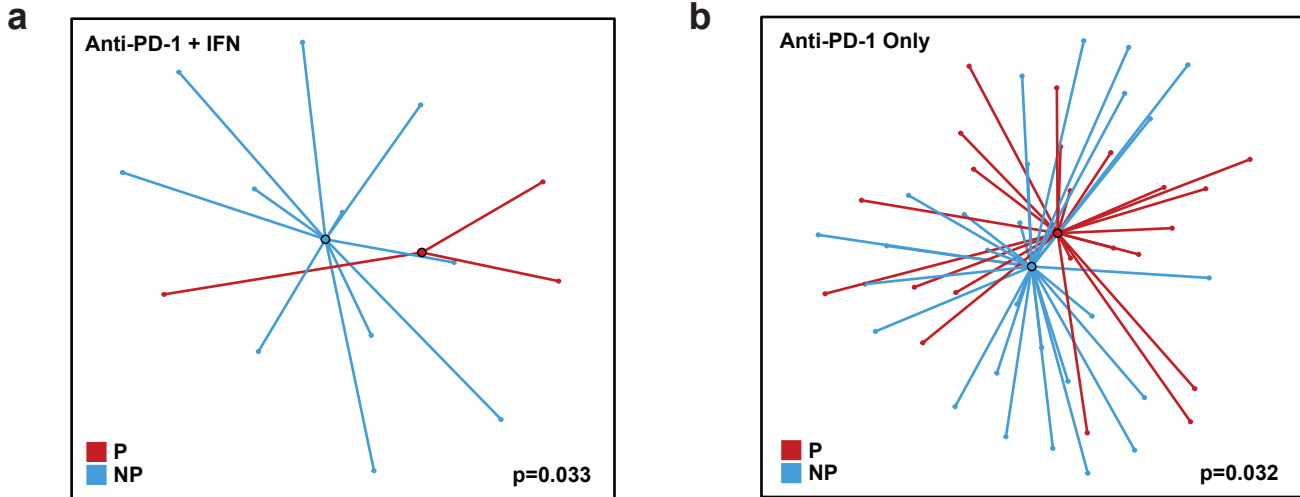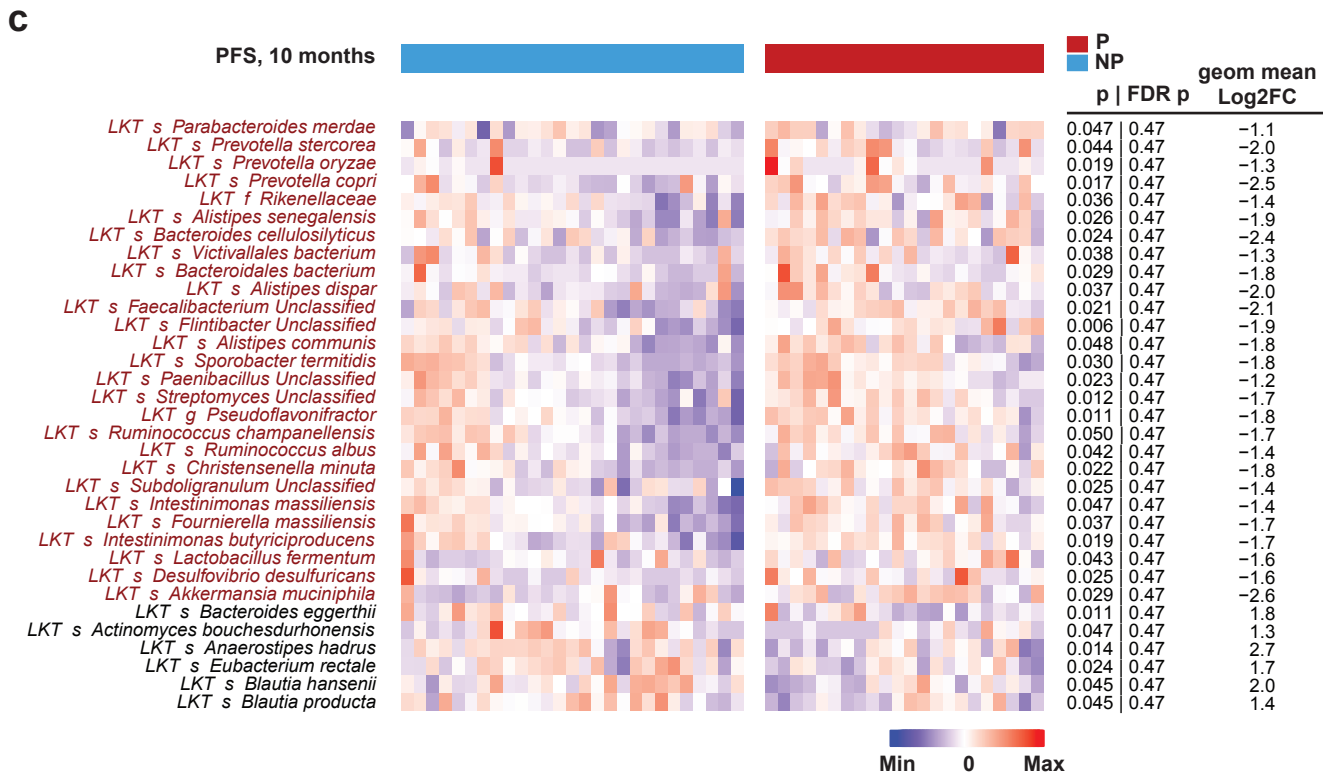

**Supplementary Fig. 1 | Analysis of microbiome composition in progressor vs non-progressor patients treated with anti-PD-1 alone or anti-PD-1 + pegIFN.**

**a and b.** t-UMAP plots depicting differences of gut microbial taxa between non-progressor (NP) and progressor (P) patients at time of maximal difference from start of therapy (10 months) in metastatic melanoma patients treated with pembrolizumab/pegIFN **(a)** or anti-PD-1 alone **(b)**. Empty circles represent centroids, with lines connecting them to corresponding samples from each group. Two-tailed p values were calculated using PERMANOVA. **c.** Heatmap of hierarchically clustered differentially abundant taxa ( $p < 0.05$ ,  $FC > 2$ ) from anti-PD-1 alone cohort. Each column represents an independent melanoma patient, while each row represents differentially abundant bacteria. Statistical significance was calculated using two-tailed Mann-Whitney U test.



# Supplementary Fig. 2 | Comparative analysis of microbiome composition in progressor vs non-progressor patients treated with anti-PD-1 alone or anti-PD-1 + pegIFN

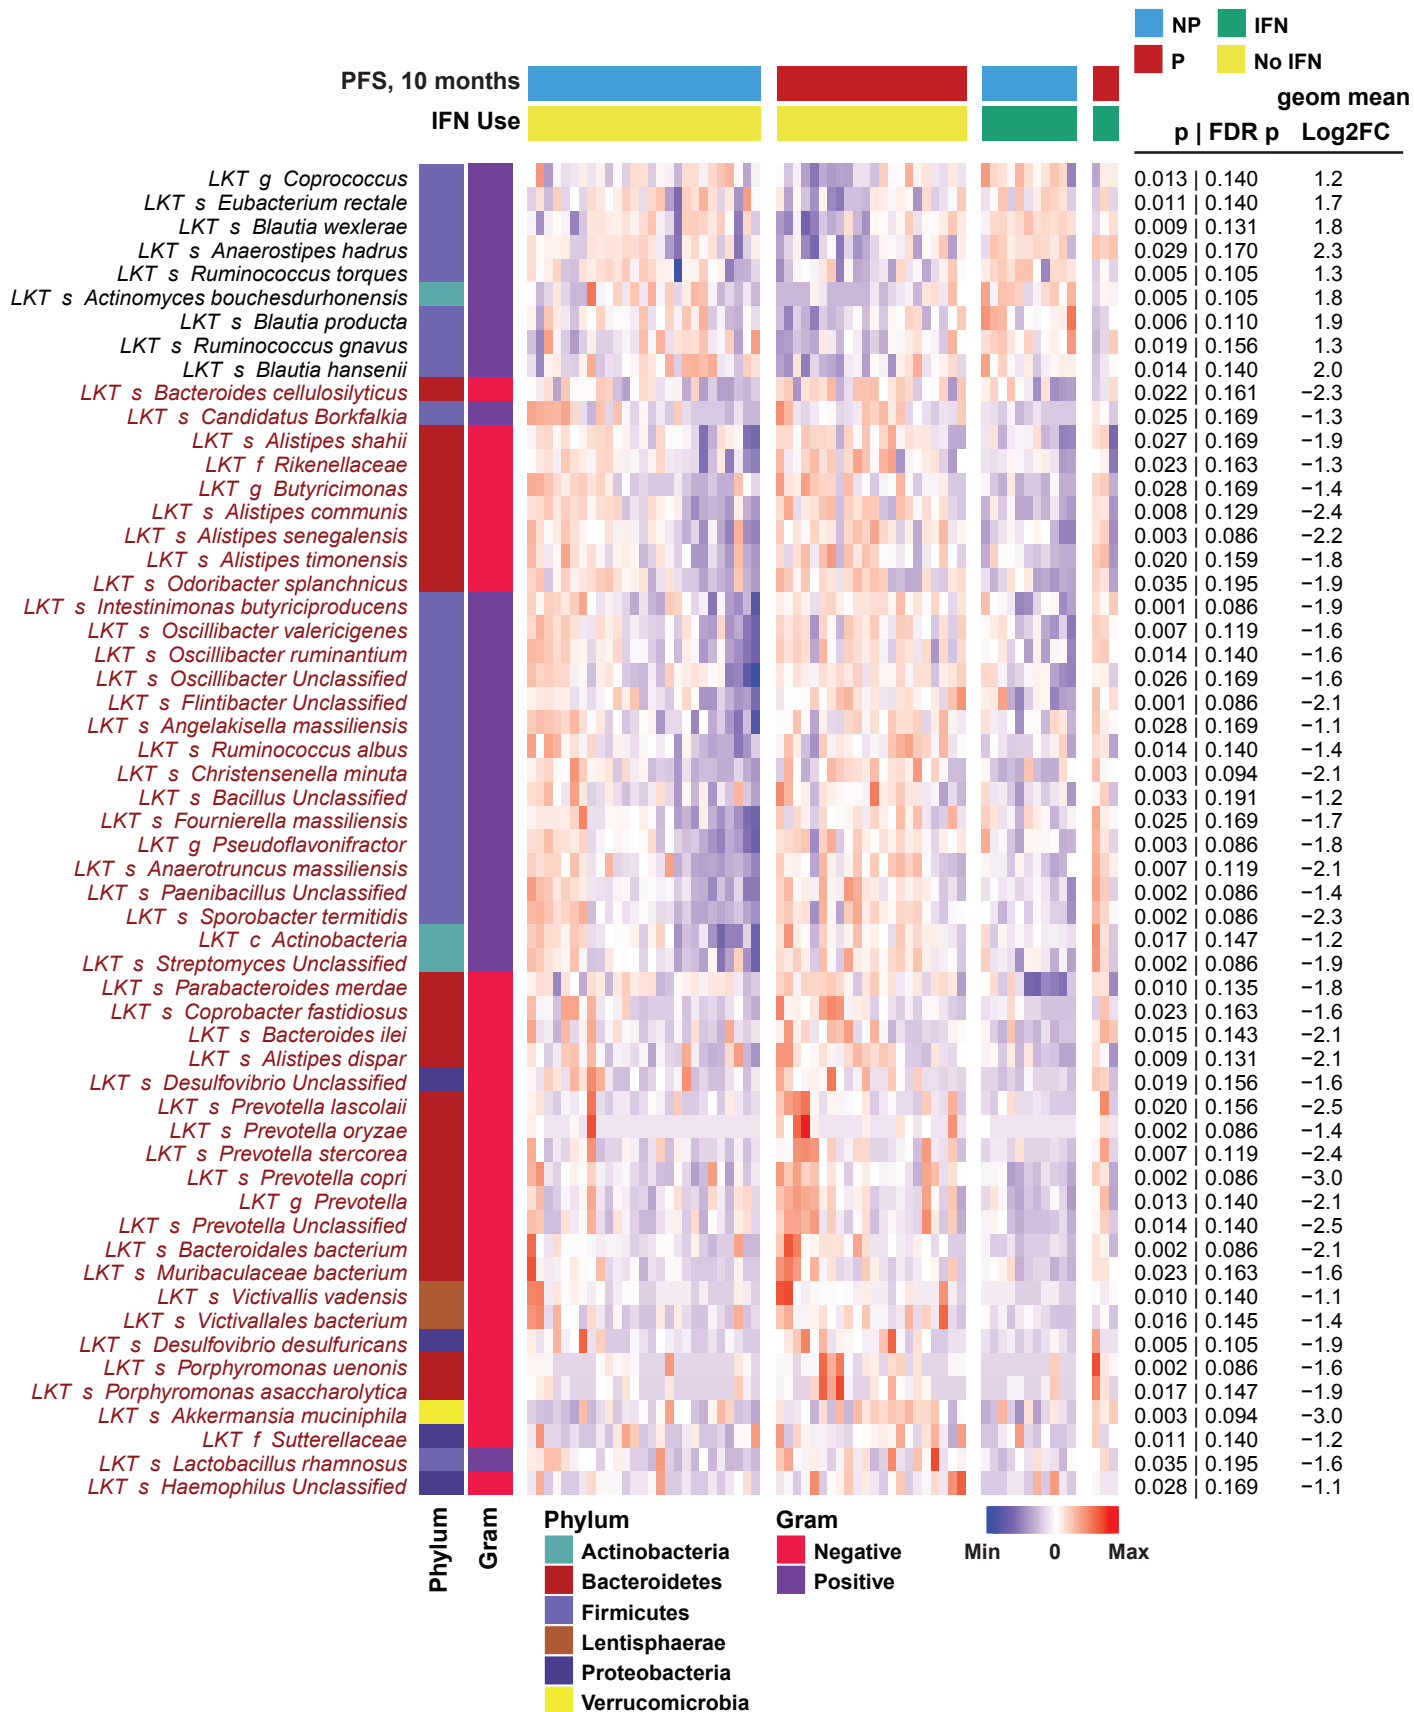

**Supplementary Fig. 2 | Comparative analysis of microbiome composition in progressor vs non-progressor patients treated with anti-PD-1 alone or anti-PD-1 + pegIFN.**

Metagenomic shotgun sequencing of fecal microbiota samples identifies differentially abundant taxa in progressor (P) vs. non-progressor (NP) patients at 10 months from start of therapy.

Heatmap shows differentially abundant taxa ( $FDR < 0.2$  and  $FC > 2$ ). Columns denote patients grouped by progression status and single or dual therapy and clustered within each group; rows denote bacterial taxa enriched (black) or depleted (red) in NPs versus Ps, clustered based on microbiota composition. Statistical significance was calculated by two-tailed Mann-Whitney U test.

# Supplementary Fig. 3 | Comparative analysis of microbiome composition in progressor vs non-progressor patients from early and late Pittsburgh cohorts

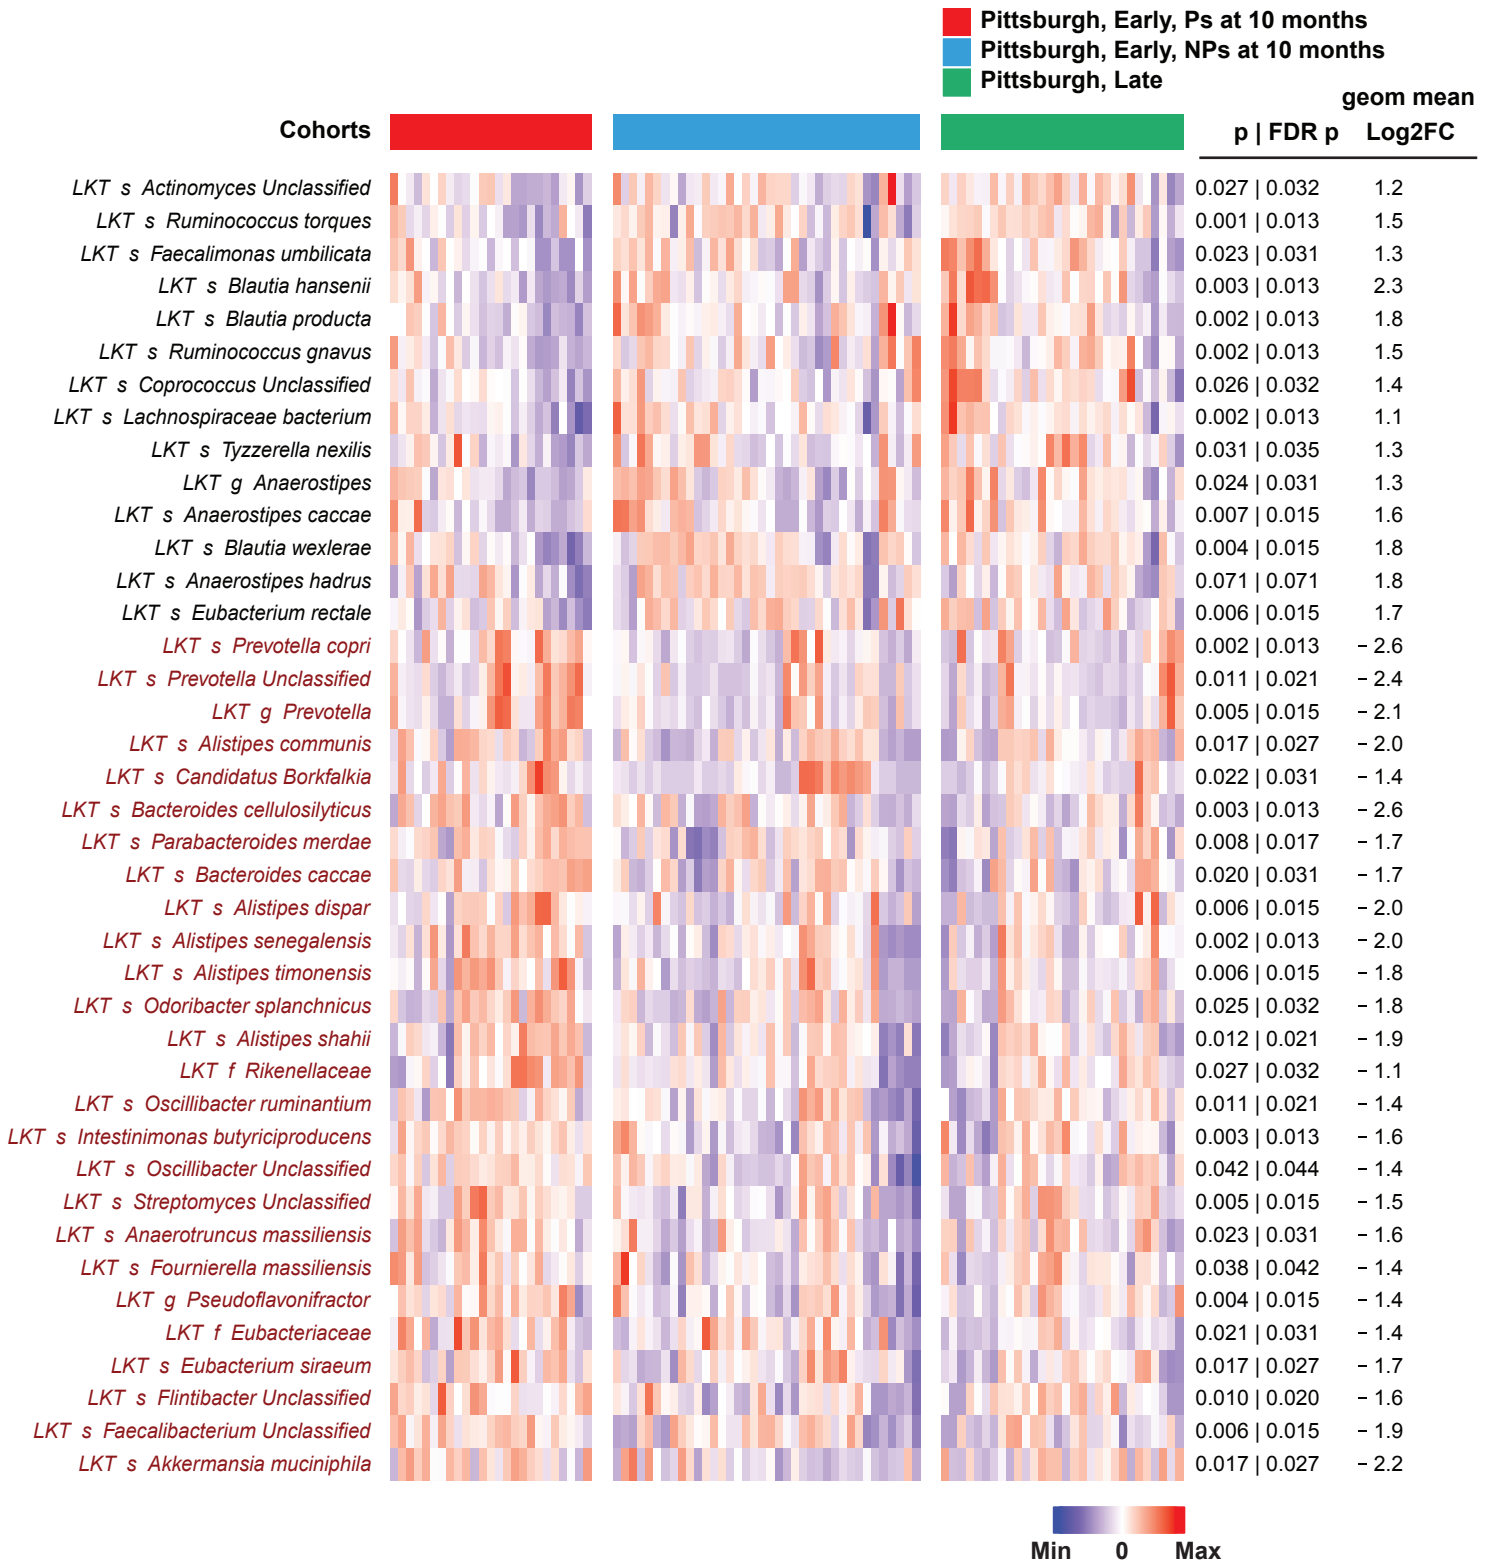

**Supplementary Fig. 3 | Comparative analysis of microbiome composition in progressor vs non-progressor patients from early and late Pittsburgh cohorts.**

Metagenomic shotgun sequencing of fecal microbiota samples identifies differentially abundant taxa in progressor (P) vs. non-progressor (NP) patients. Heatmap shows the top 40 differentially abundant taxa identified. Columns denote patients grouped by progression status at 10 months and time of feces collection, and clustered within each group; rows denote bacterial taxa enriched (black font) or depleted (red font) in NPs versus Ps, clustered based on microbiota composition. Statistical significance was calculated by two-tailed Mann-Whitney U test. Microbiota composition of non-progressor patients in the Pittsburgh cohort whose stool samples were collected 4 to 41 months after initiation of the therapy was enriched for similar bacterial taxa as observed in the initial microbiome of patients who did not progress at 10 months.

# Supplementary Fig. 4 | Relation of immune-related adverse effects to progression free survival and microbiome composition

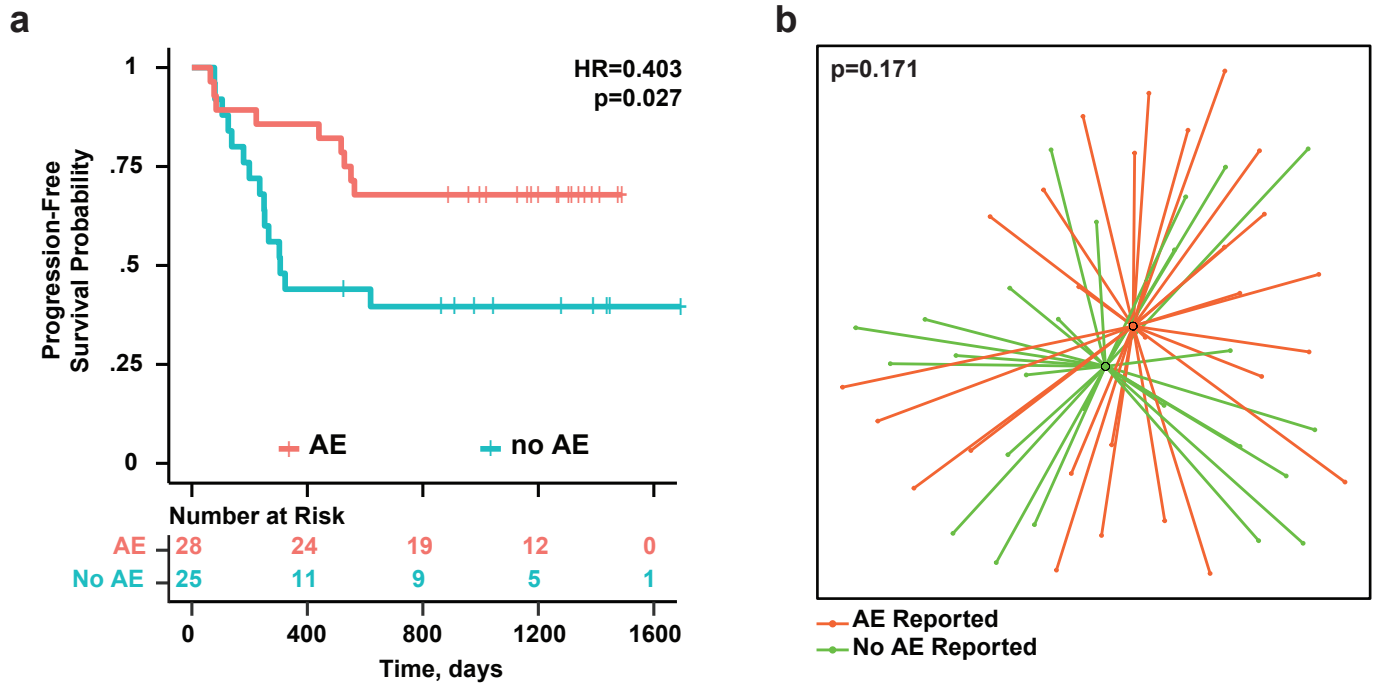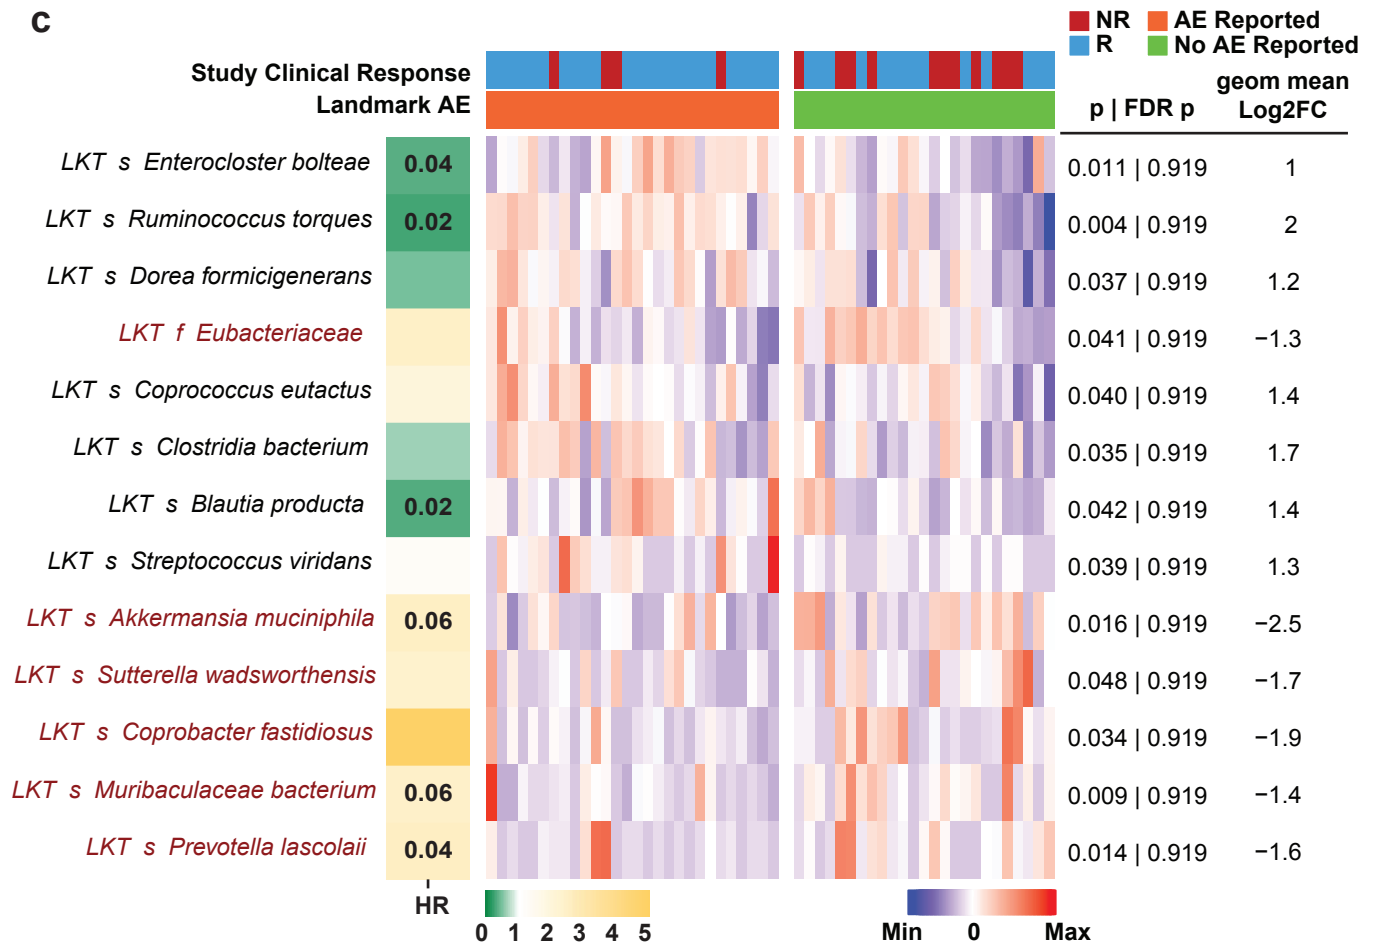

**Supplementary Fig. 4 | Relation of immune-related adverse effects to progression free survival and microbiome composition.**

Landmark analysis using patients who survived for at least 10 months after initiation of therapy. An immune-related adverse effect (irAE) was considered to be present only if was developed before the landmark date. **a.** Kaplan-Meier plot and Cox regression analysis of progression-free survival (PFS) for patients with and without irAE at landmark. Hazard Ratio (HR) and score (logrank) test two-tailed p-value from Cox proportional hazards regression analysis. **b.** tUMAP plot depicting compositional differences between melanoma patients (landmark time 10 months) who developed grade 1-4 irAEs or not. Two-tailed p value was calculated using PERMANOVA. **c.** Heatmap of differentially abundant taxa ( $p < 0.05$  and  $FC > 2$ ) in patients (landmark time 10 months) who developed grade 1-4 irAEs or not. irAE severity was graded with CTCAE v5.0. The column on the left shows HR and Storey's q-value (if  $< 0.1$ ) for each last known taxon (LKT). Columns in the heatmap depict patients grouped by reported or non-reported irAE and clustered within corresponding groups based on gut microbiome composition. Rows depict bacterial taxa enriched (black) or depleted (red) in melanoma patients with irAEs (grade 1-4) and clustered based on gut microbiota composition. Statistical significance was calculated by two-tailed Mann-Whitney U test.

# Supplementary Fig. 5 | Complete list of taxa associated with various immune-related adverse effects in melanoma patients treated with anti-PD-1 immunotherapy in Pittsburgh cohort

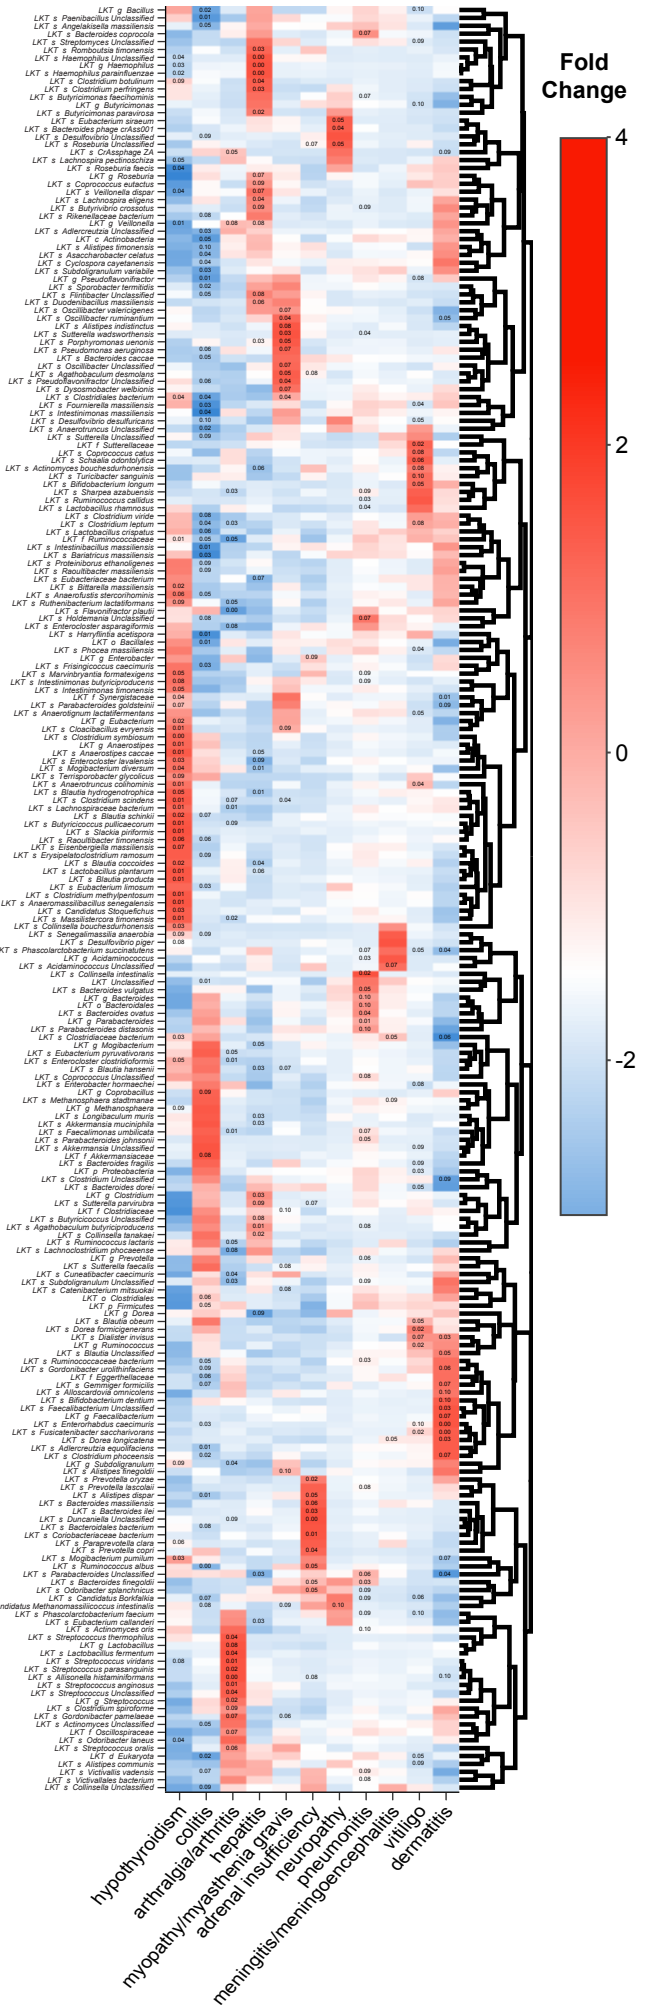

**Supplementary Fig. 5 | Complete list of taxa associated with various immune-related adverse effects in melanoma patients treated with anti-PD-1 immunotherapy in Pittsburgh cohort.**

Heatmap depicts metagenomic compositional differences between patients with distinct irAEs using scaled fold differences (high – red; low – blue) in abundances of specific bacteria between patients with the indicated type of irAE (x axis) as compared to patients with other irAEs. Values in individual cells represent unadjusted p values calculated using two-tailed Mann-Whitney U test with p values <0.1 displayed within cells.



# Supplementary Fig. 6 | Proton pump inhibitor exposure is associated with differential abundance of select taxa and shorter progression free survival in Pittsburgh cohort

a

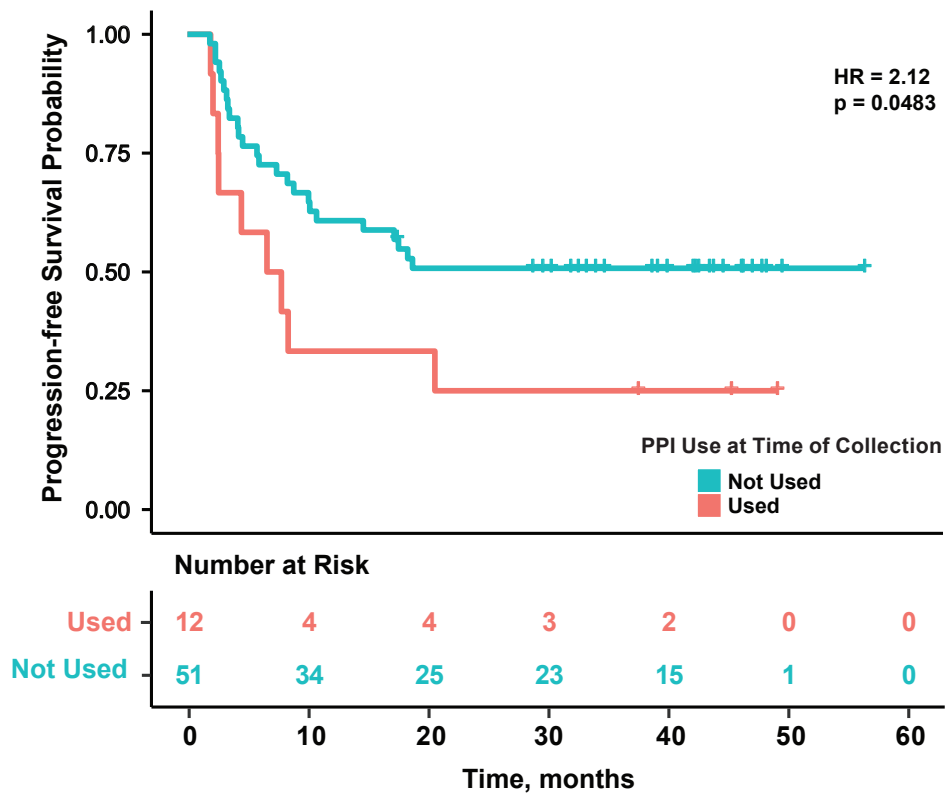

b

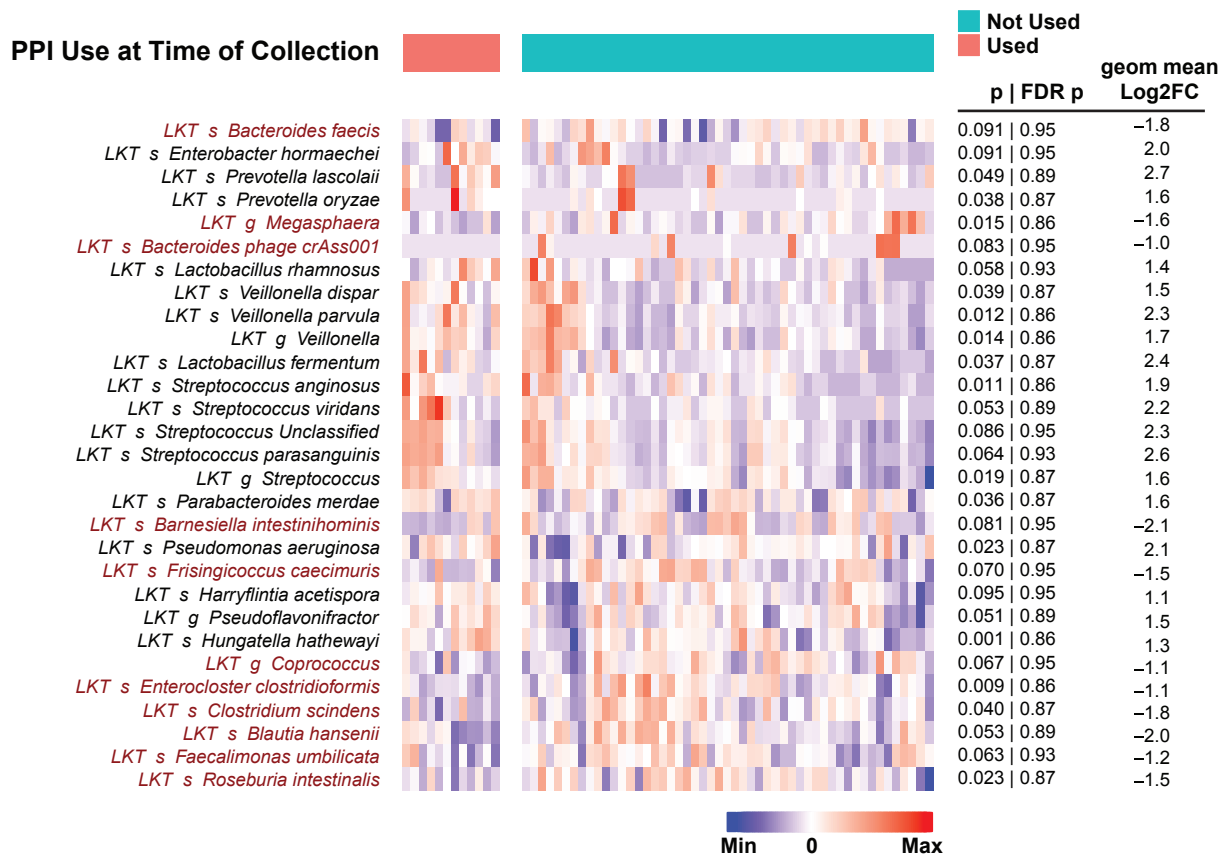

**Supplementary Fig. 6 | Proton pump inhibitor exposure is associated with differential abundance of select taxa and shorter progression free survival in Pittsburgh cohort.**

**a.** Effect of proton pump inhibitor (PPI) exposure at the time of stool collection upon progression free survival using Cox proportional hazard model in samples from Pittsburgh.

The number of people at risk in either group is shown below each panel. Hazard Ratio (HR) and score (logrank) test two-tailed p-value from Cox proportional hazards regression analysis. **b.** Heatmap shows hierarchically clustered differentially abundant taxa ( $p < 0.1$ ,  $FC > 2$ ) between patients with PPI exposure as compared to patients without PPI exposure. Each column represents an independent melanoma patient, while each row represents differentially abundant bacteria. Statistical significance was calculated by two-tailed Mann-Whitney U test.

# Supplementary Fig. 7 | Heatmaps of differentially abundant taxa analyzed using the same bioinformatic pipeline in four previously published cohorts of melanoma patients treated with anti-PD-1 immunotherapy

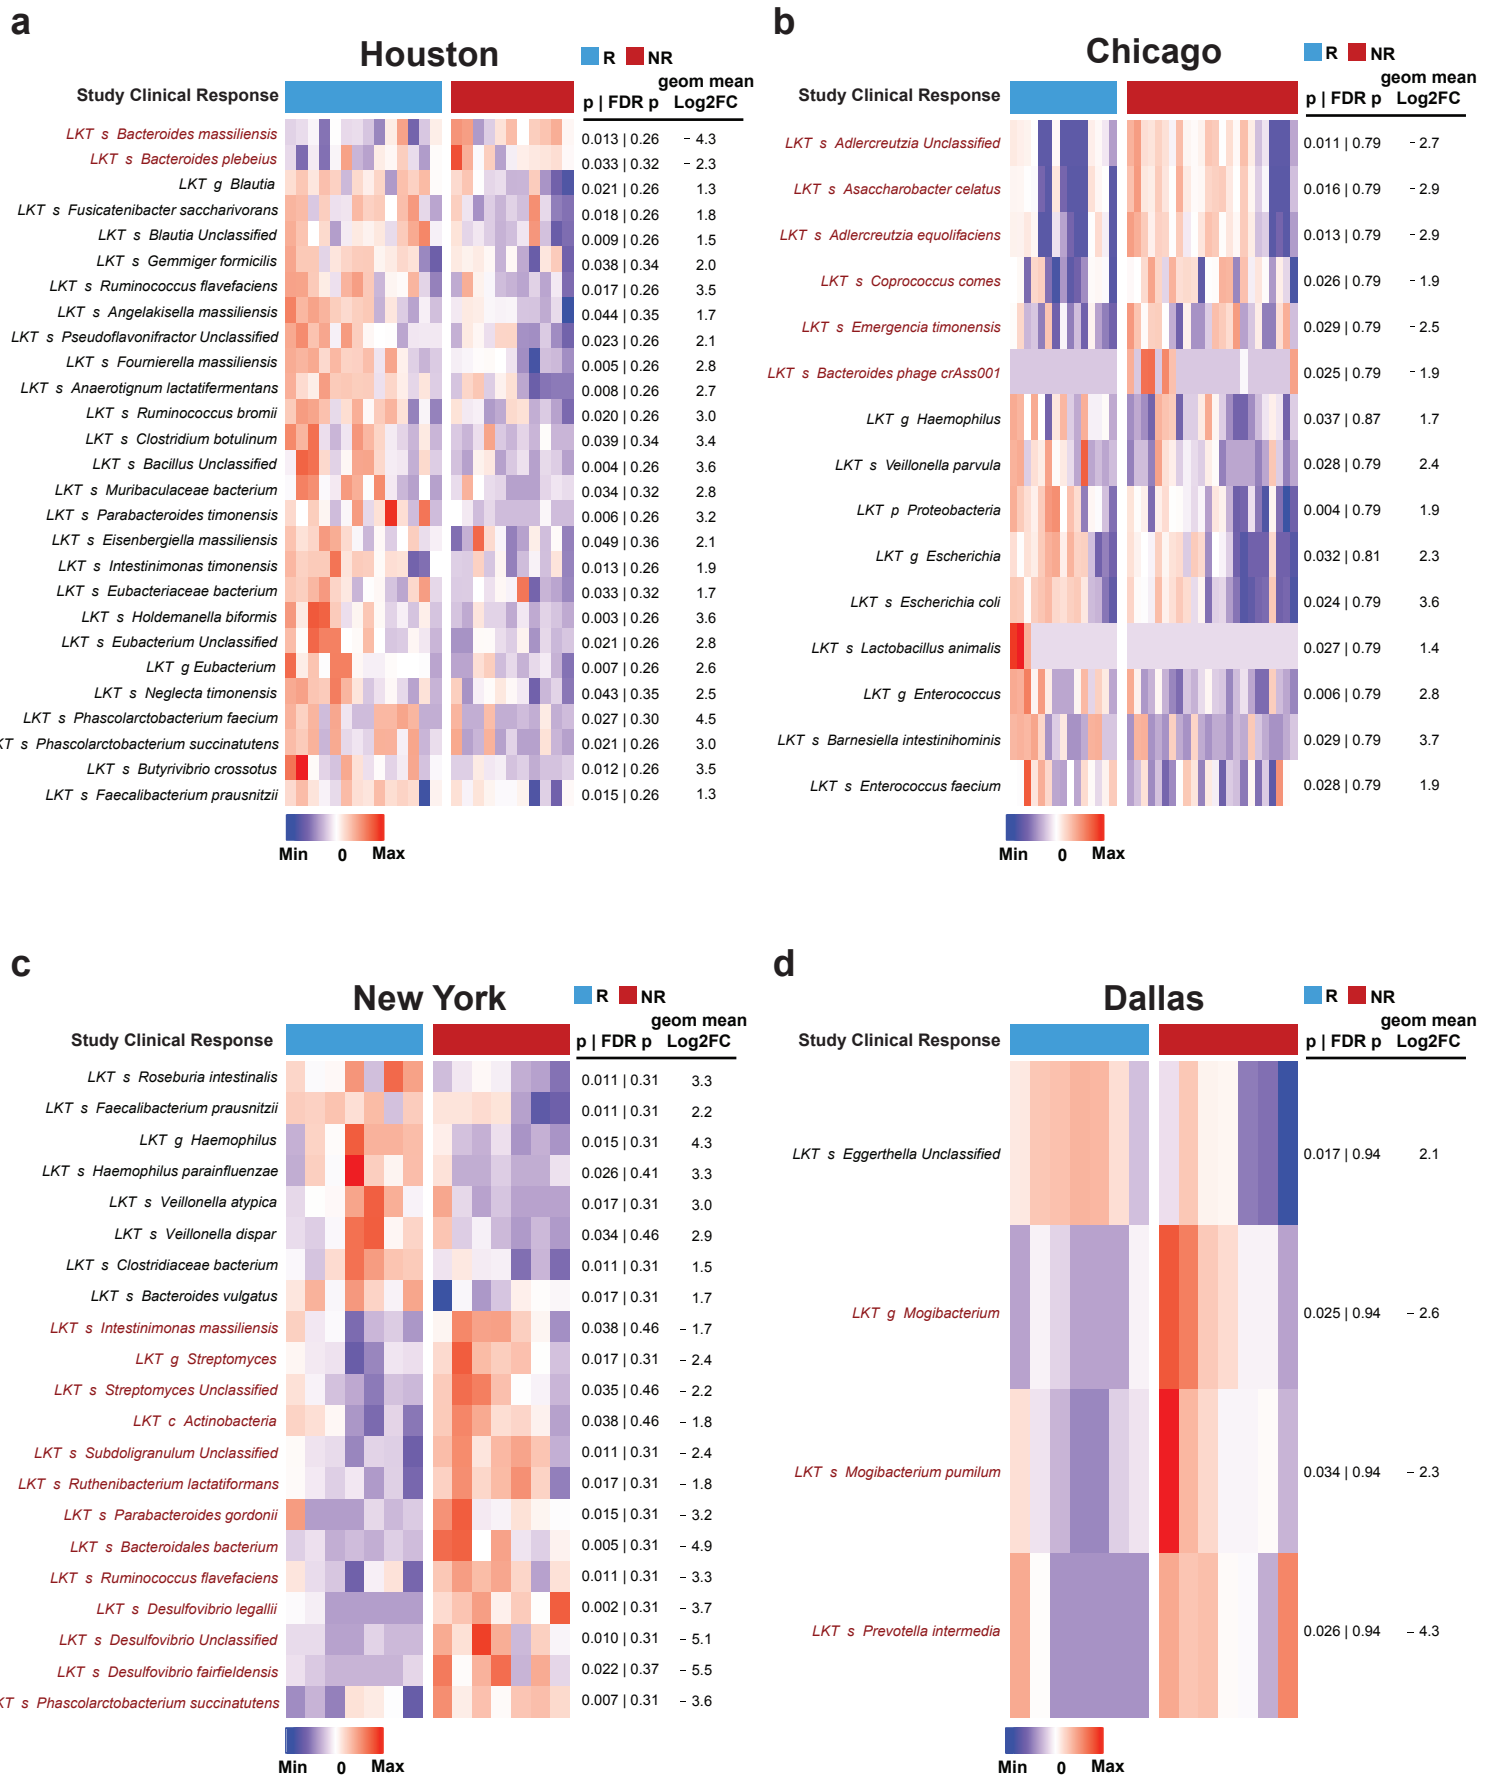

**Supplementary Fig. 7 | Heatmaps of differentially abundant taxa analyzed using the same bioinformatic pipeline in four previously published cohorts of melanoma patients treated with anti-PD-1 immunotherapy.**

**a-d.** Each heatmap depicts differentially abundant taxa identified by metagenomic shotgun sequencing ( $p < 0.05$ ,  $FC > 2$ ) from four independent melanoma cohorts (**a** – Houston; **b** – Chicago; **c** – New York; **d** – Dallas). Columns denote patients grouped by response status. Response to therapy in the published cohorts was determined as described in each study (**Supplementary Table S3**). Rows denote bacterial taxa enriched (black) or depleted (red) in responder (R) vs non-responder (NR) patients clustered based on microbiota composition.

Statistical significance was calculated by two-tailed Mann-Whitney U test.

# Supplementary Fig. 8 | Compositional differences in the gut microbiome of anti-PD-1 treated melanoma patients from Houston are associated with progression free survival.

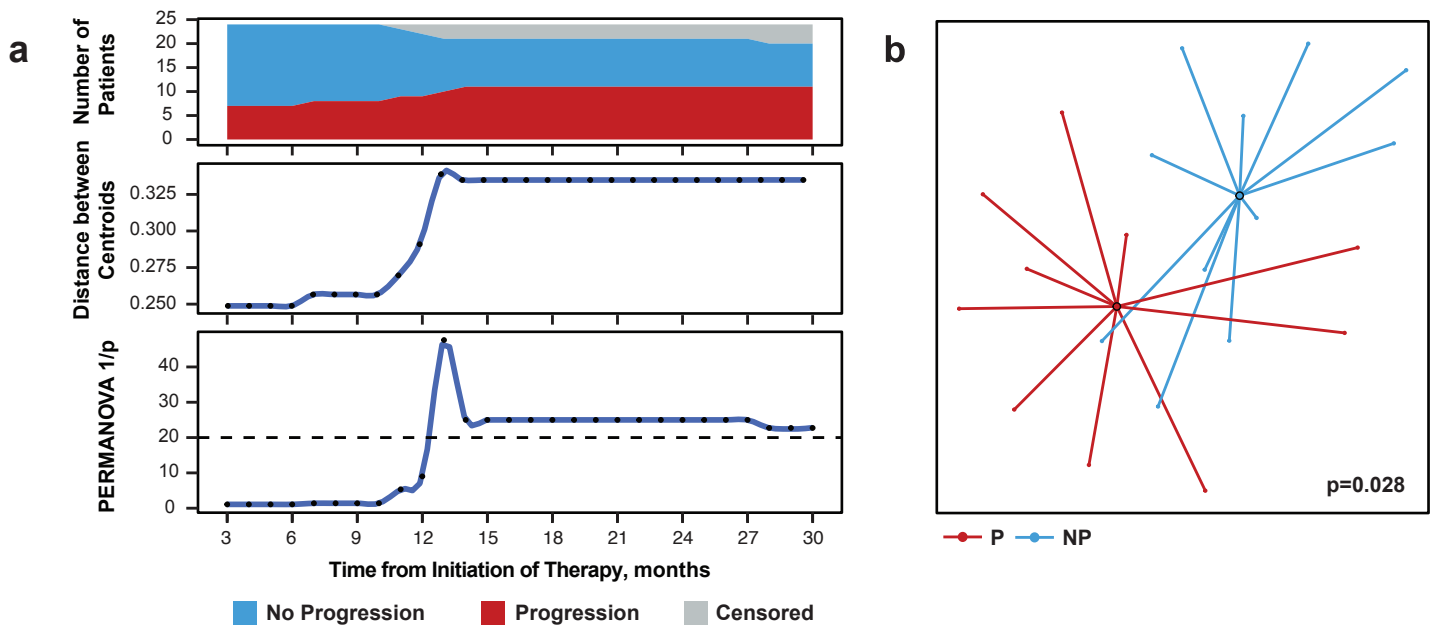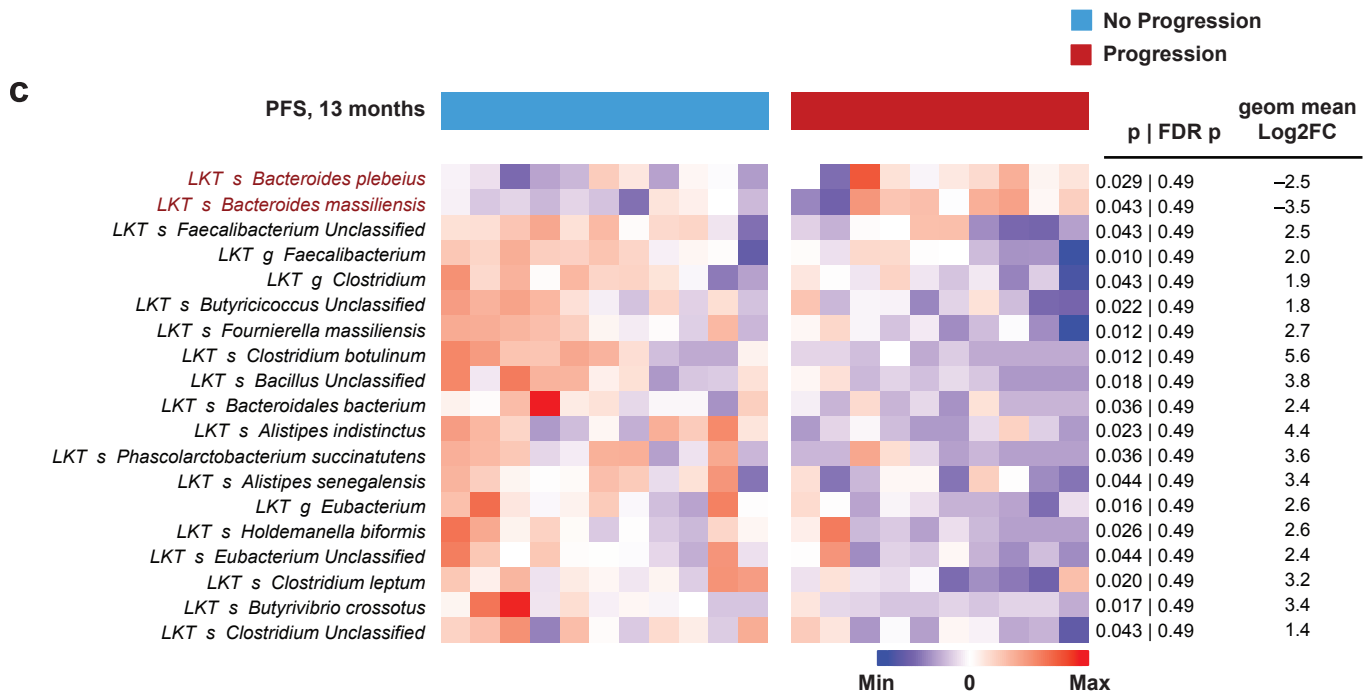

**Supplementary Fig. 8 | Compositional differences in the gut microbiome of anti-PD-1 treated melanoma patients from Houston cohort are associated with progression free survival.**

**a.** Evaluation of effects of initial (pre-treatment up to 3 months on treatment) fecal microbiome composition (metagenomic shotgun sequencing) upon investigator-assessed response to anti-PD-1 therapy. Top panel depicts number of patients on follow-up at each timepoint in relation to response status. Middle panel shows the distance in composition of the initial microbiome between progressor (P) and non-progressor (NP) patients identified at each treatment visit. Distances between the P and NP group centroids was calculated at each timepoint as the Euclidean distance between the two centroids in all component dimensions of Bray-Curtis distance principal component analysis. Bottom panel shows the significance (two-tailed p-value) of the difference at each time point using PERMANOVA  $1/p$  of Bray-Curtis distance. **b.** t-UMAP plot depicting fecal microbiota compositional differences between NPs and Ps at time of maximal difference from start of therapy (13 months). Empty circles represent centroids with lines connecting them to corresponding samples from each group. Two-tailed p-values were calculated using PERMANOVA. **c.** Metagenomic shotgun sequencing of fecal microbiota samples identifies differentially abundant taxa in Ps vs. NPs at 13 months from start of therapy. Heatmap shows differentially abundant taxa identified by metagenomic shotgun sequencing ( $p < 0.05$  and  $FC > 2$ ). Columns denote patients grouped by progression status and clustered within NP/P groups; rows denote bacterial taxa enriched (black) or depleted (red) in NPs versus Ps clustered based on microbiota composition. Statistical significance was calculated by two-tailed Mann-Whitney U test.

# Supplementary Fig. 9 | Correlation of microbial abundance with progression free survival and in-silico validation of significant microbes in an independent cohort

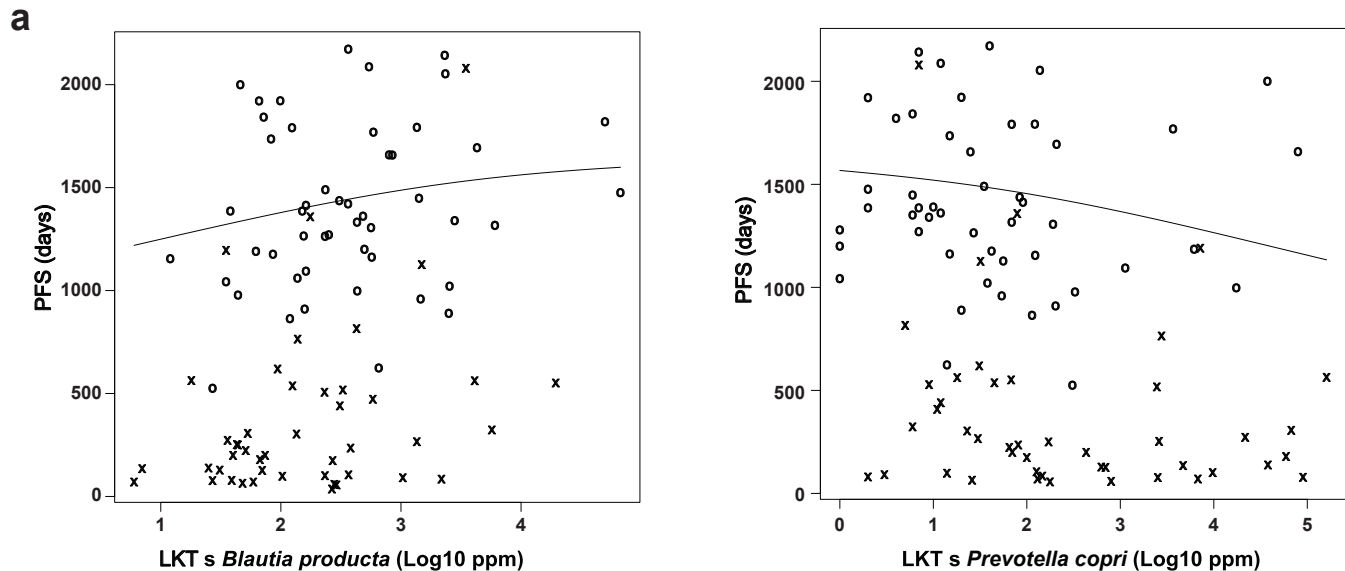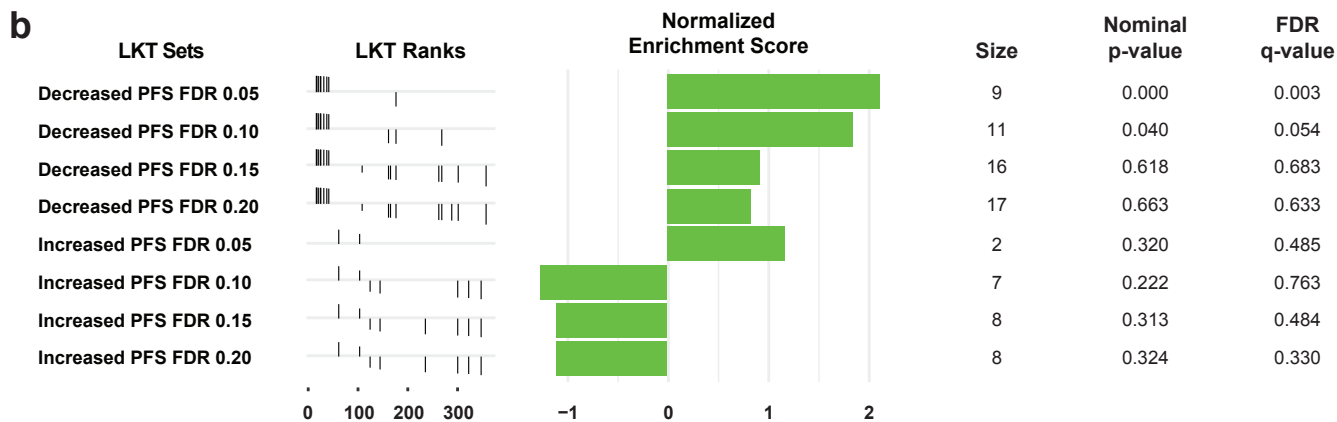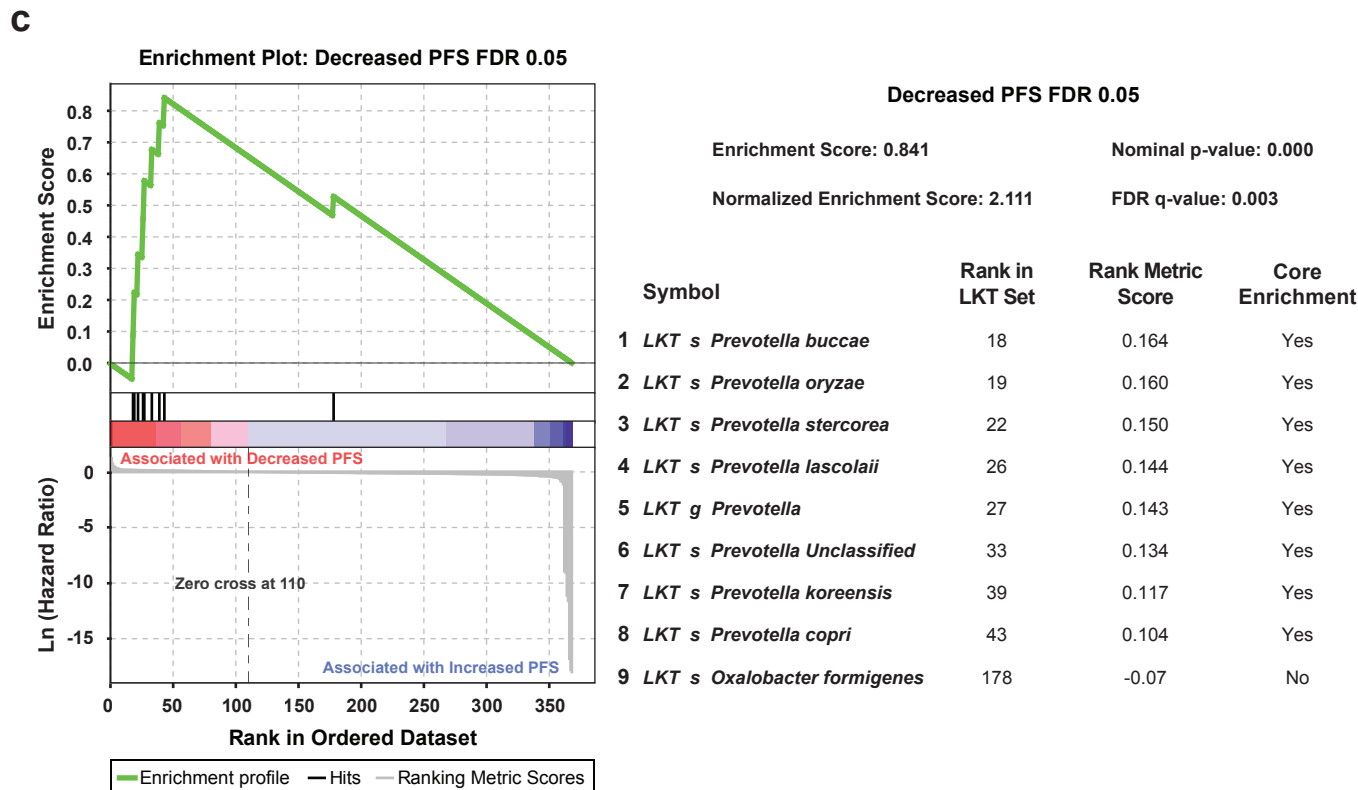

**Supplementary Fig.9 | Correlation of microbial abundance with progression free survival and in-silico validation of significant microbes in an independent cohort.**

**a.** Scatterplot of microbial abundance vs progression free survival (PFS) for two representative microbes from the Pittsburgh cohort. The spline represents a smooth, nonparametric estimate of the median PFS as a function of last known taxon (LKT) abundance, calculated using the sm-survival algorithm. **x** indicates PFS; **o** indicates time of last observation for patients who did not progress. **b.** and **c.** Gene set enrichment analysis (GSEA) to check whether the significant taxa at different FDR cutoffs (“LKT sets”) at different FDR cutoffs (0.05, 0.10, 0.15, 0.20) from one cohort (Pittsburgh) are enriched ( $q < 0.05$ ) in an independent cohort (Houston) pre-ranked as per beta from CV Cox Regression (Supplementary Table 10). Only unfavorable LKTs (microbes associated with shorter PFS) from one cohort were enriched in the independent cohort; and increasing FDR cutoff for favorable LKTs only introduced noise without increasing significance. **c.** Enrichment plot and list of LKTs from the leading edge for the most significant LKT set from **(b).**



**Supplementary Fig. 10 | Microbial genes differentially enriched in responder and non-responder patients by fecal microbiome meta-analysis of five independent cohorts of anti-PD-1 treated melanoma patients**

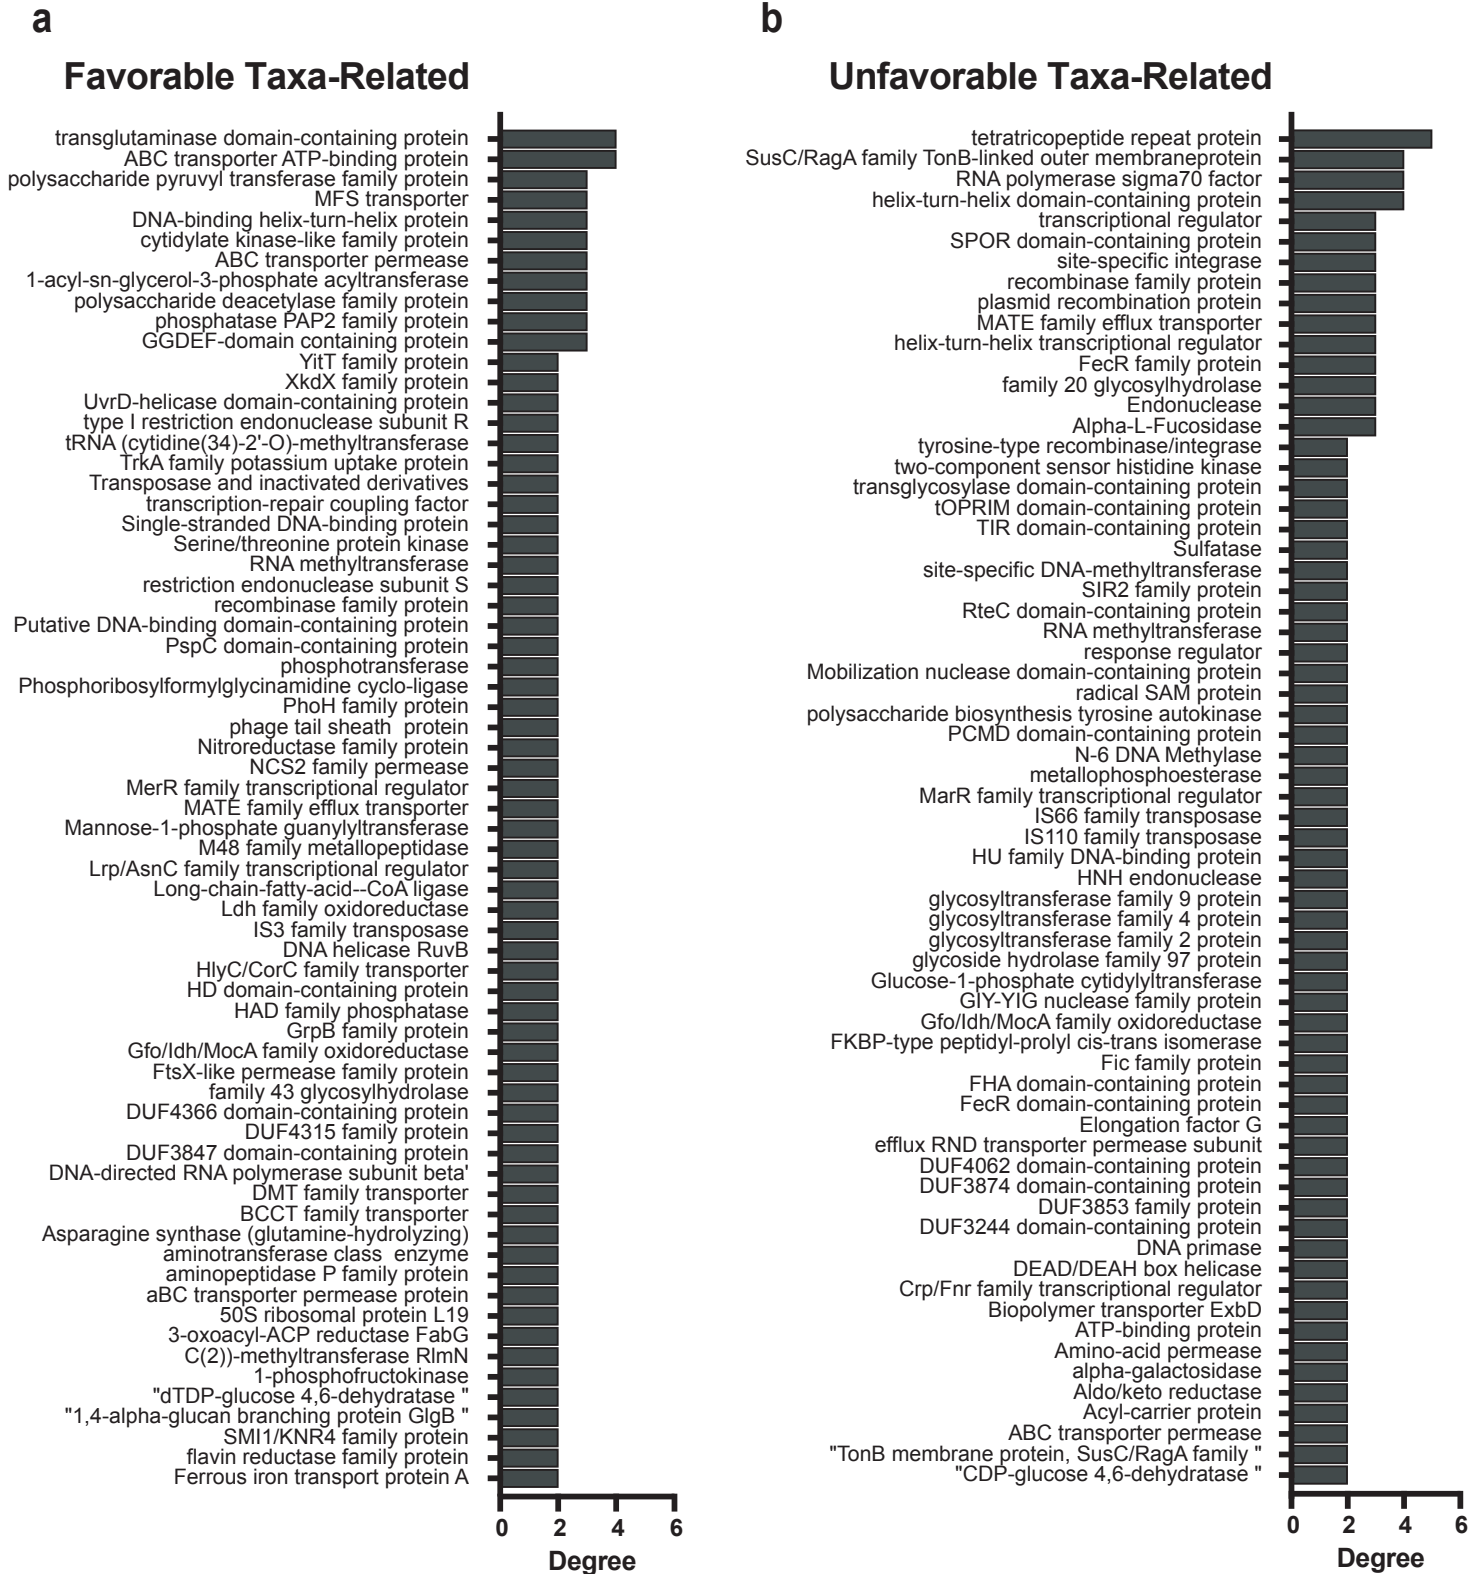

**Supplementary Fig. 10 | Microbial genes differentially enriched in responder and non-responder patients by fecal microbiome meta-analysis of five independent cohorts of anti-PD-1 treated melanoma patients.**

After removing study-related batch effects using ComBat R package, the resultant batch-corrected dataset was further analyzed using linear discriminant analysis effect size (LEfSe).

# Supplementary Fig. 11 | Machine learning models trained on one cohort and tested on another show limited predictive ability

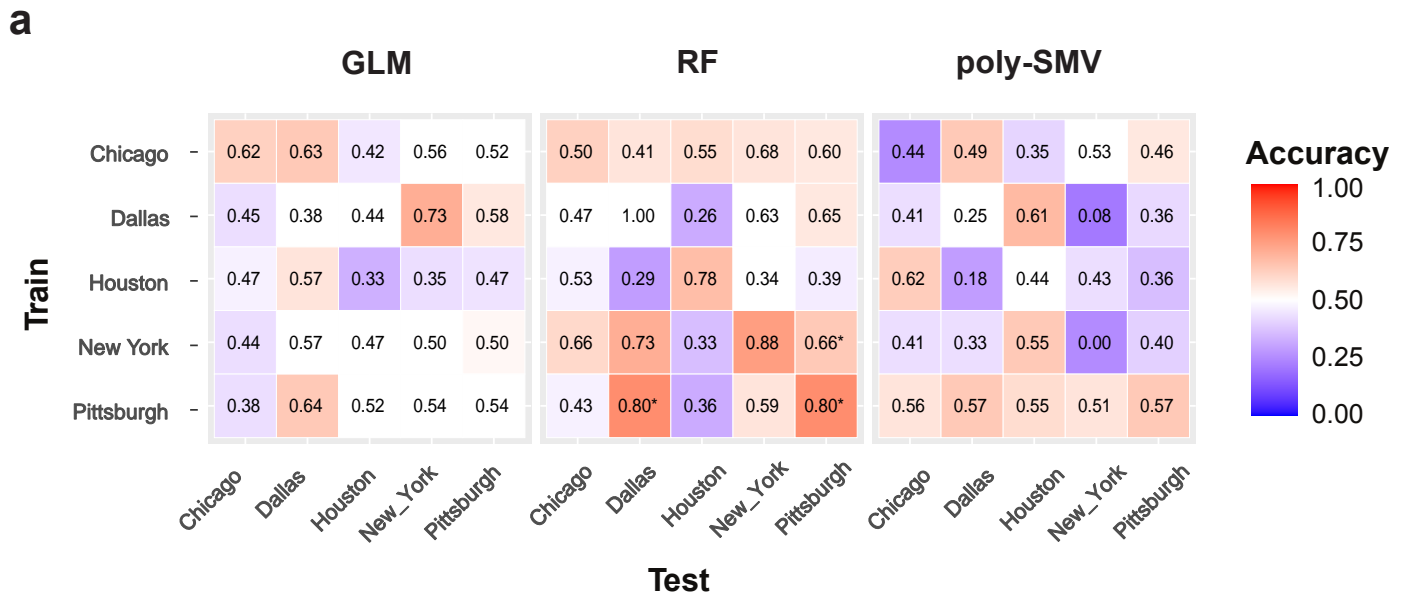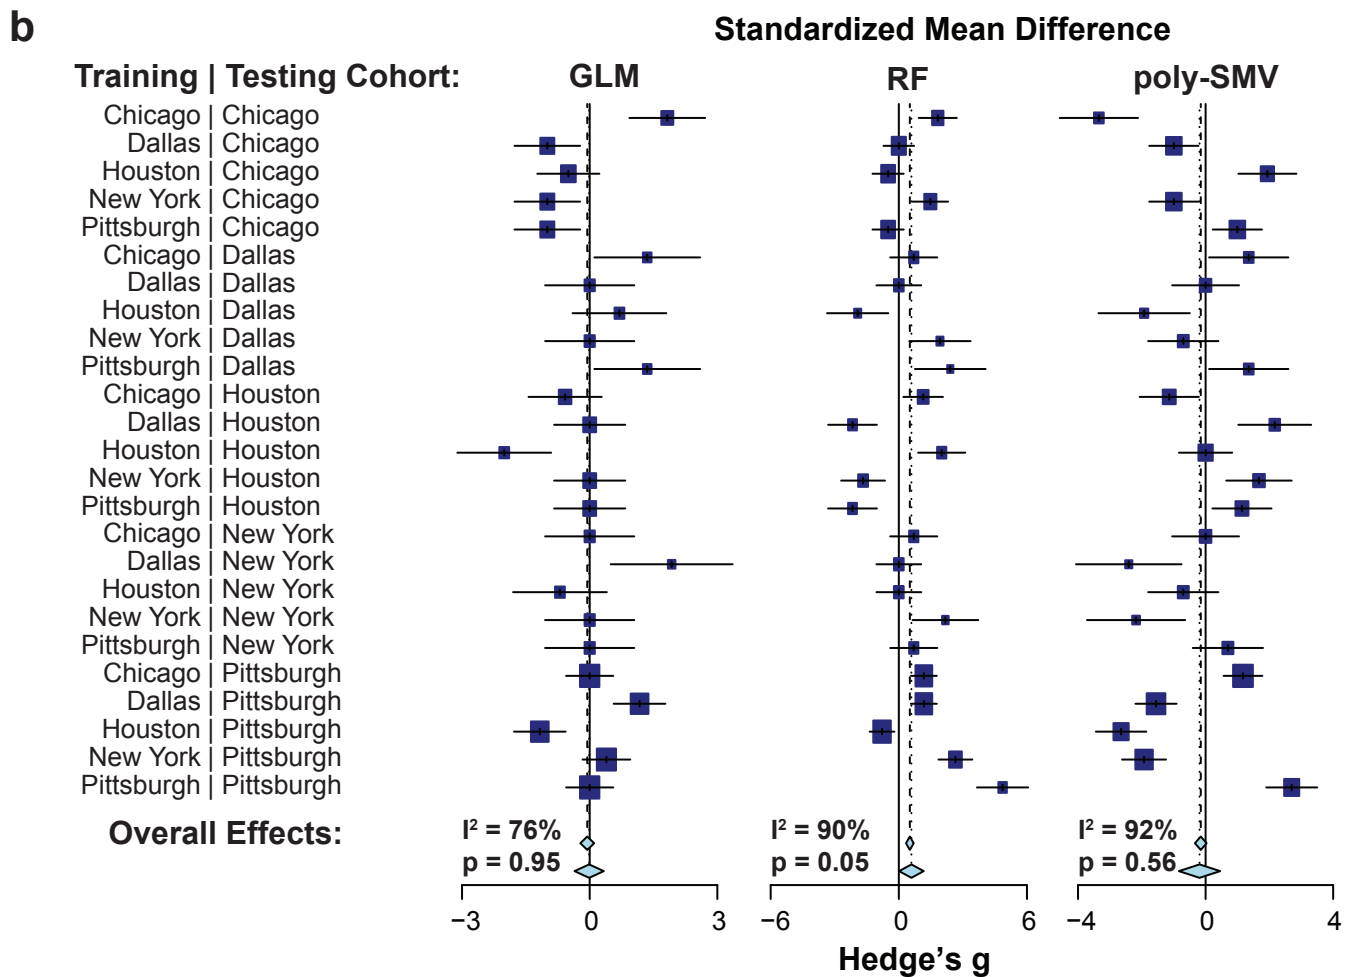

**Supplementary Fig. 11 | Machine learning models trained on one cohort and tested on another show limited predictive ability.**

**a.** Heatmap showing all 25 combinations of train and test cohorts for each machine learning method [generalized linear model (GLM), random forest (RF), polynomial support vector machine (poly-SMV)]. Accuracies are shown by color scale, and area under the curve (AUC) by numbers with an asterisk if the result is significant ( $p < 0.05$ ) ( $p[\text{accuracy}] > \text{no information rate}$ ] via the one-tailed binomial test). In cases where the train and test cohort are the same, accuracy given is that of the 30% test set rather than the full cohort to avoid testing on the training set. **b.** Forest plots based on results from **(a)**. Each machine learning method gets a separate forest plot with the cohorts shown on different lines. Hedge's  $g$  (squares, standardized mean difference, size proportional to sample size) and associated 95% confidence intervals (bars) are shown along with the dotted vertical line of no effect. To control for unobserved heterogeneity, we separately evaluated Hedge's  $g$  using random effect model on metagenomic data and performed  $I^2$  test for heterogeneity as shown.

Supplementary Fig. 12 | Network of shared organisms important for response prediction based on leave one-out analysis.

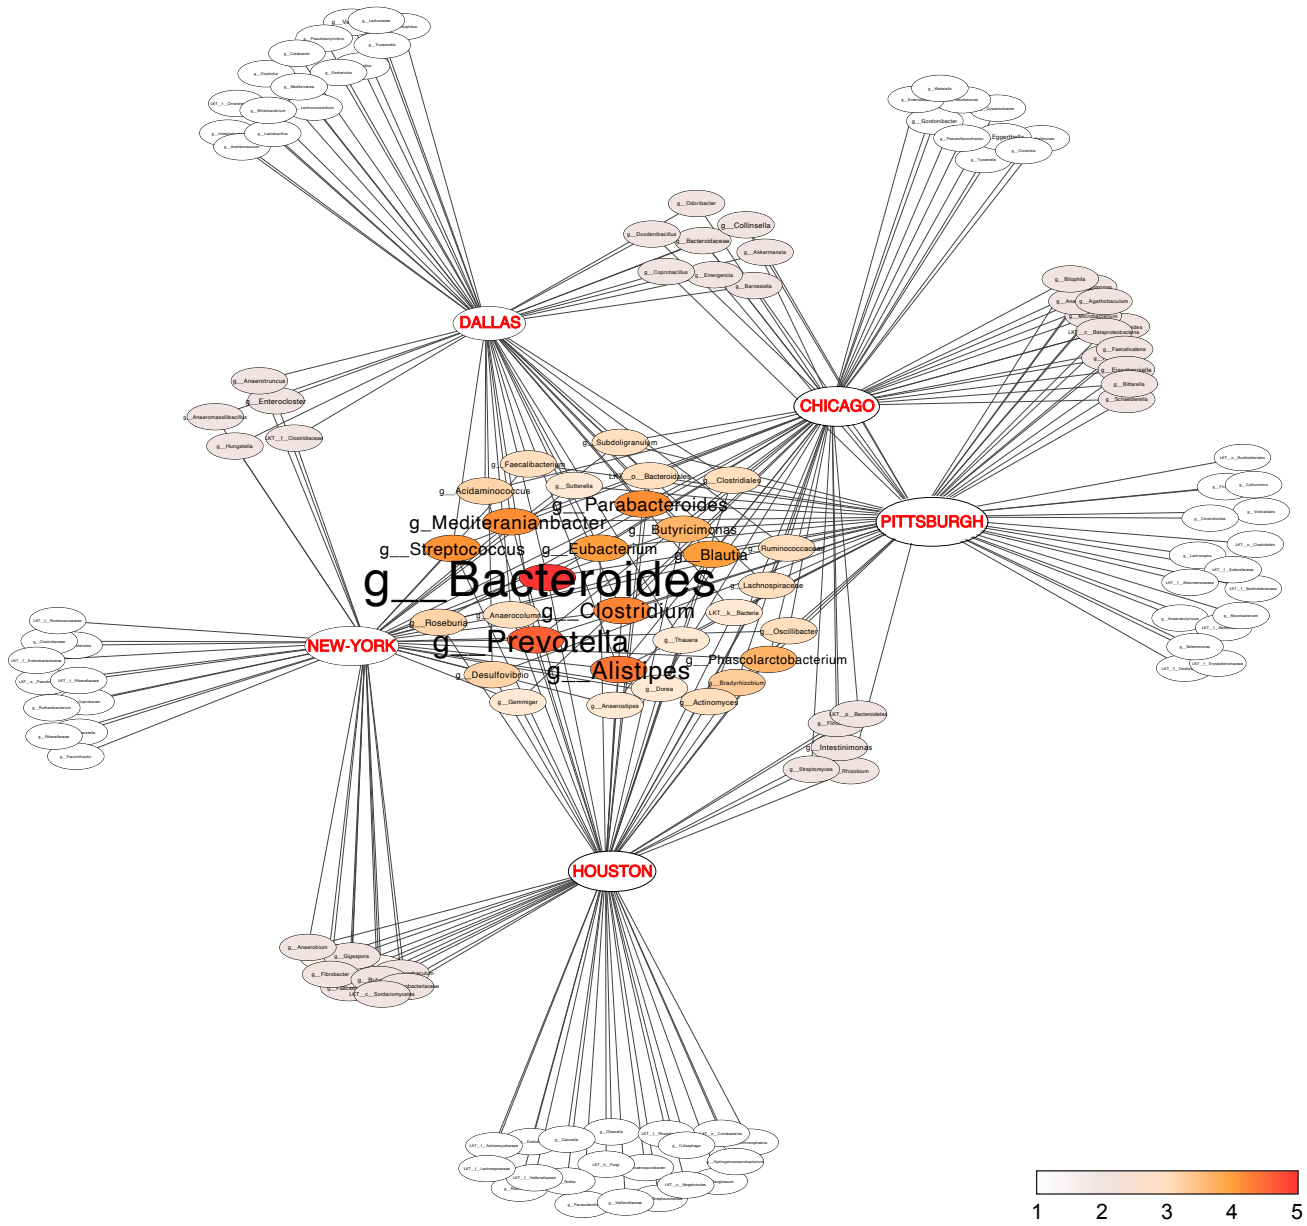

**Supplementary Fig. 12 | Network of shared organisms important for response prediction based on leave one-out analysis.**

The organisms shown are among the top 20 organisms in model importance in at least one of the five cohorts in the random forest leave one-out analysis. Size of the organism label (and color of the node) is based on how many of the five cohorts had that organism among its top 20.

Supplementary Fig. 13 | Correlogram of taxa abundance to each other using metagenomic data from five melanoma cohorts

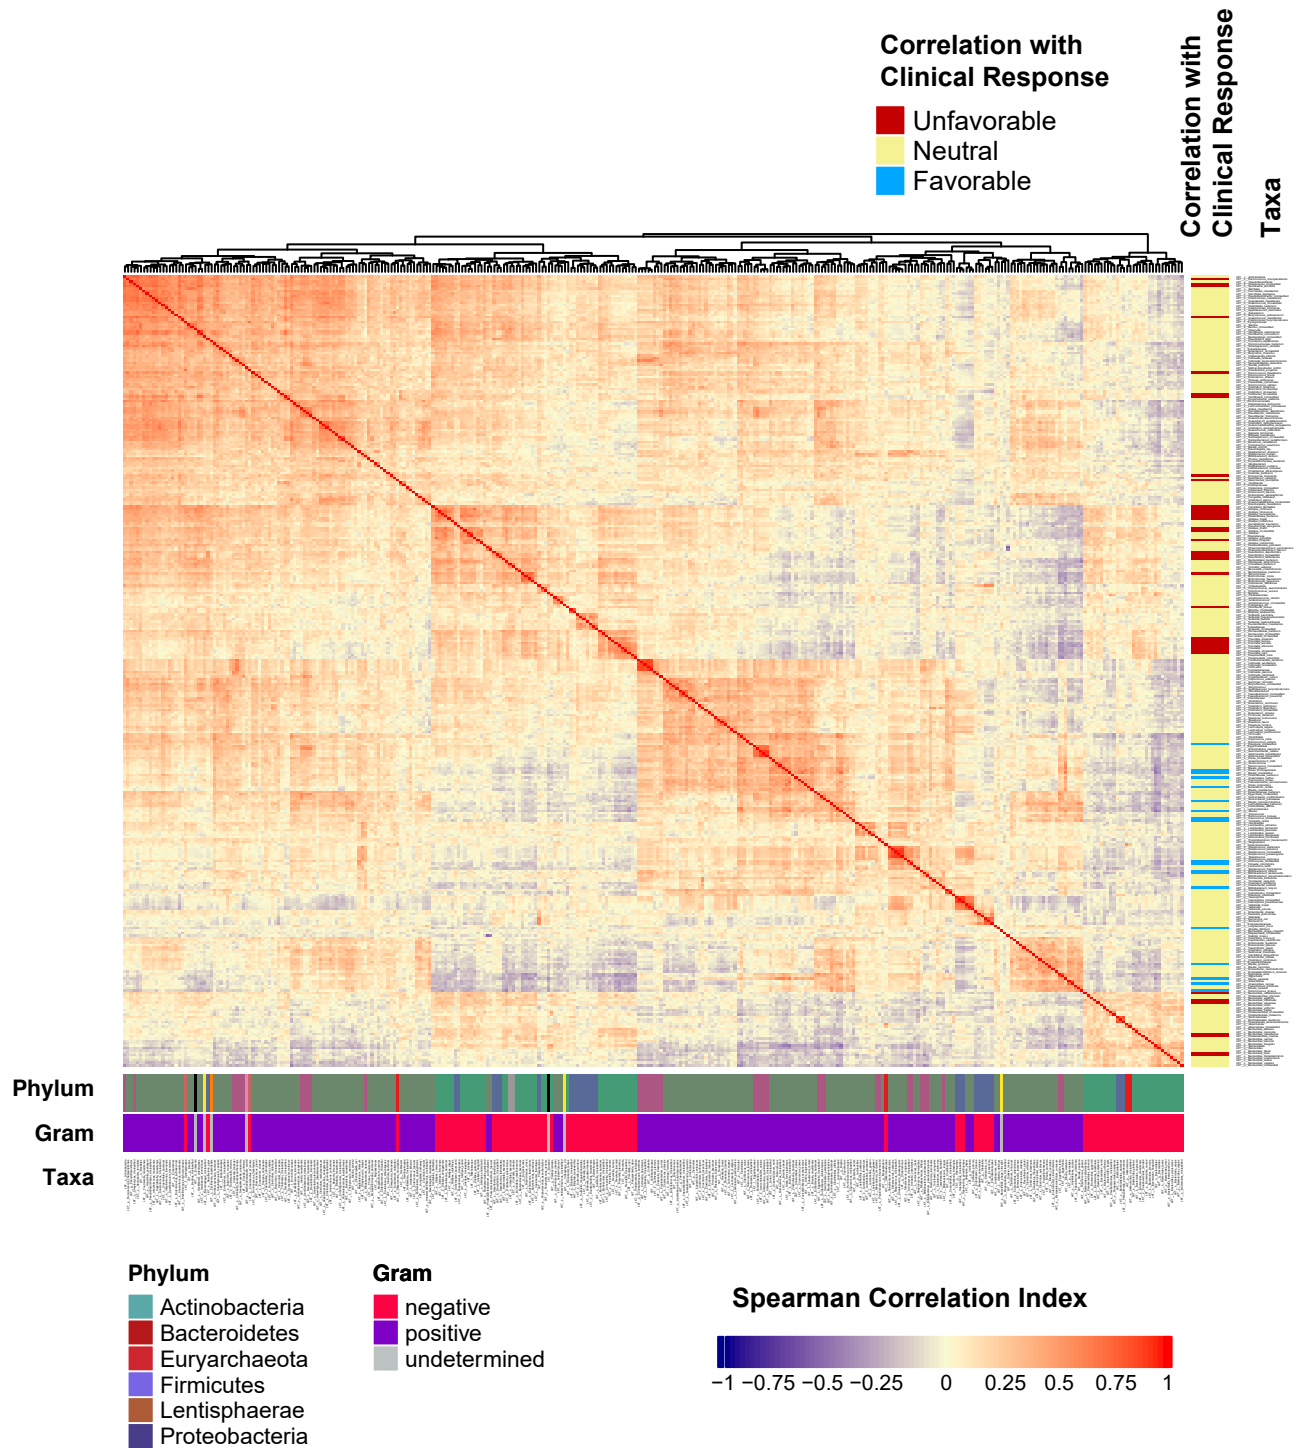

**Supplementary Fig. 13 | Correlogram of taxa abundance to each other using metagenomic data from five melanoma cohorts.**

Pairwise correlations between the COMBAT batch-corrected relative abundances of the top 330 most variant taxa across samples were calculated using Spearman's rank correlation coefficient. Taxa whose largest Spearman  $\rho$  with any other taxon was  $< 0.3$  are not shown. Bar on right represents taxa significantly associated (blue – beneficial; red - detrimental) with response or non-response to anti-PD-1 therapy, while bars on the bottom represent phylum and Gram stain characteristics of each taxa. To be considered significantly associated with response or non-response to anti-PD-1 therapy, a taxon had to present a raw p-value of at least 0.1 as calculated by the Mann-Whitney-Wilcoxon U-test and an absolute log<sub>2</sub> fold-change of at least 0.5 between responder and non-responder patients on the same COMBAT batch-corrected relative abundances as used for the correlogram.



Supplementary Fig. 14 | Enteric microbiotypes identified in the American Gut Project database and their distribution within the four cohorts of PD-1-treated melanoma patients

a

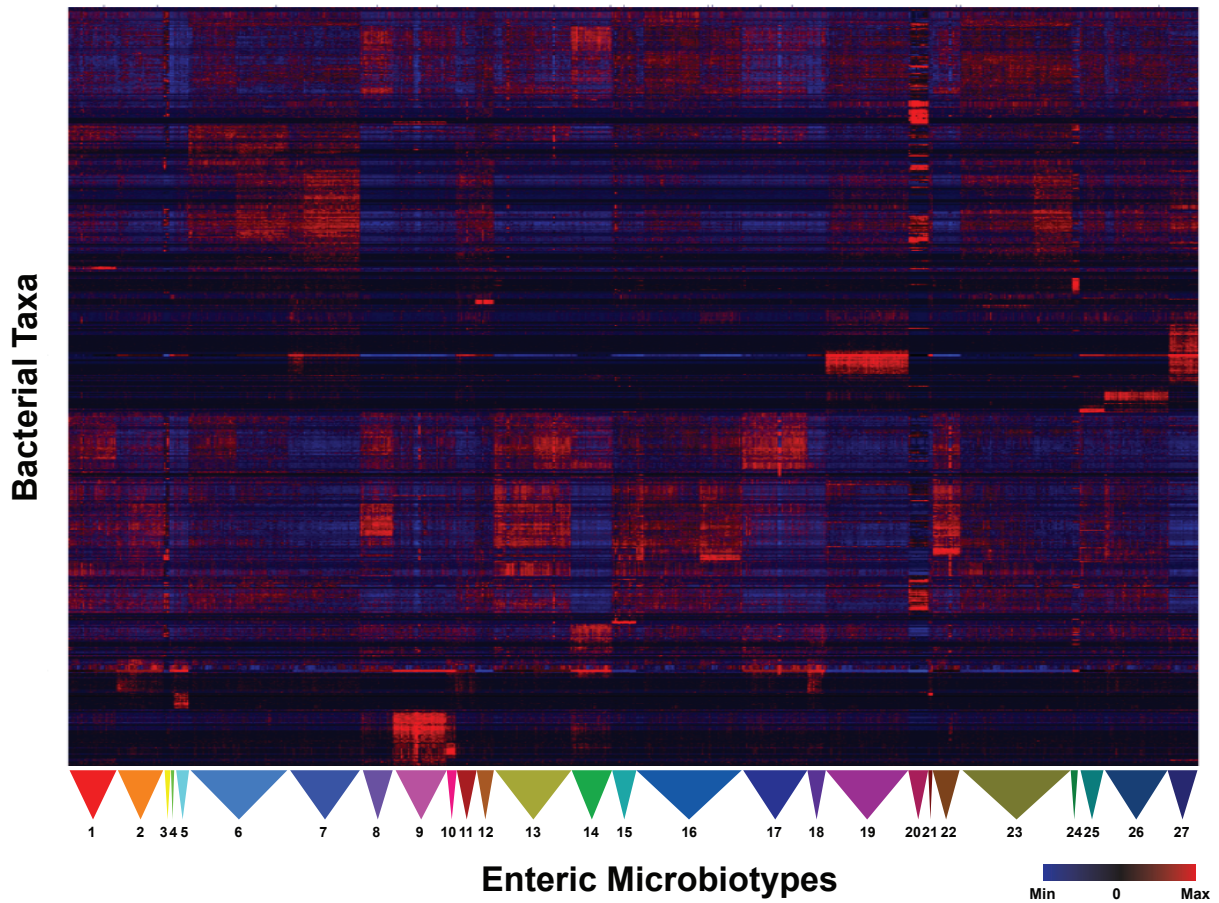

b

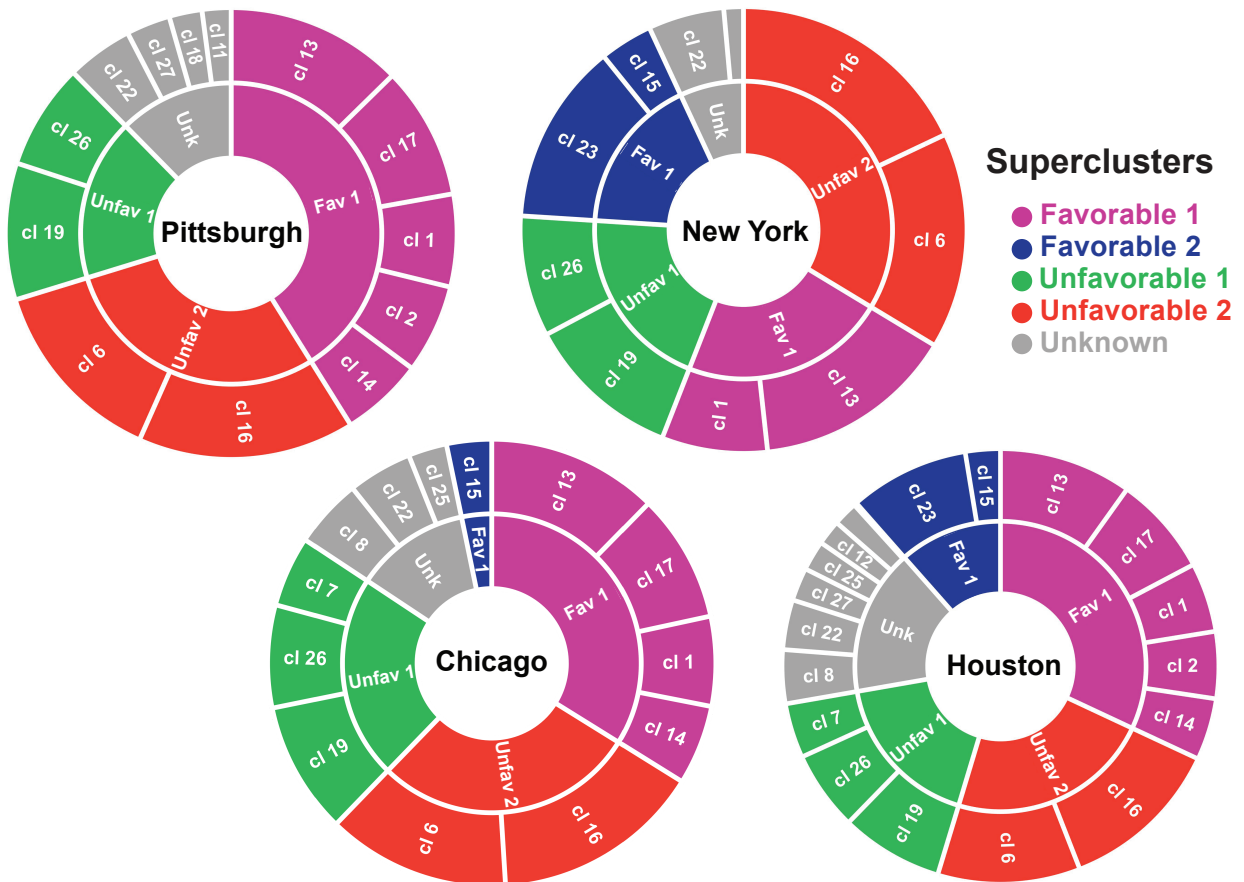

**Supplementary Fig. 14 | Enteric microbiotypes identified in the American Gut Project database and their distribution within the four cohorts of PD-1-treated melanoma patients.**

**a.** The heatmap shows the distribution of differentially abundant taxa in different clusters/microbiotypes from American Gut Project (AGP) fecal microbiota dataset identified using PhenoGraph R package. **b.** Nested pie charts show relative distribution of microbiotypes and favorable or unfavorable superclusters within four cohorts of PD-1-treated melanoma patients.

**Supplementary Table 1. Patient characteristics (Pittsburgh cohorts)**

| <b>Characteristics</b>               | <b>Total<br/>(n = 94)</b> | <b>Early Sample Cohort<br/>(n = 63)</b> | <b>Late Sample Cohort<br/>(n = 31)</b> |
|--------------------------------------|---------------------------|-----------------------------------------|----------------------------------------|
| <b>Age (Years):</b>                  |                           |                                         |                                        |
| Median, range                        | 70 (32-90)                | 67 (32-90)                              | 74 (41-89)                             |
| <b>Sex:</b>                          |                           |                                         |                                        |
| Male                                 | 66 (70%)                  | 42 (67%)                                | 24 (77%)                               |
| <b>Race:</b>                         |                           |                                         |                                        |
| Caucasian                            | 94 (100%)                 | 63 (100%)                               | 31 (100%)                              |
| <b>Body Mass Index:</b>              |                           |                                         |                                        |
| Males: Median, range                 | 29 (19-43)                | 28 (19-43)                              | 29 (20-42)                             |
| Females: Median, range               | 30 (18-42)                | 32 (18-42)                              | 29 (25-42)                             |
| <b>Melanoma Stage IV Grouping:</b>   |                           |                                         |                                        |
| M1a                                  | 29 (31%)                  | 18 (29%)                                | 11 (36%)                               |
| M1b                                  | 20 (21%)                  | 14 (22%)                                | 6 (19%)                                |
| M1c                                  | 34 (36%)                  | 24 (38%)                                | 10 (32%)                               |
| M1d                                  | 1 (12%)                   | 7 (11%)                                 | 4 (13%)                                |
| <b>Lactate Dehydrogenase:</b>        |                           |                                         |                                        |
| Median, range (U/ml)                 | 202 (136-1108)            | 202 (141-603)                           | 202 (136-1108)                         |
| Ratio to high normal (171u/ml)       | 1.18 (0.80-6.48)          | 1.18 (0.82-3.53)                        | 1.18 (0.80-6.48)                       |
| <b>Neutrophil Lymphocyte Ratio:</b>  |                           |                                         |                                        |
| Median, range                        | 2.73(1.06-17.29)          | 2.74 (1.29-17.29)                       | 2.69 (1.06-11.29)                      |
| <b>Prior therapy:</b>                |                           |                                         |                                        |
| None                                 | 78 (83%)                  | 60 (95%)                                | 18 (58%)                               |
| Anti-CTLA-4                          | 13 (14%)                  | 3 (5%)                                  | 10 (32%)                               |
| High Dose IL-2                       | 3 (3%)                    | 0                                       | 3 (10%)                                |
| BRAF/MEK Inhibitors                  | 4 (4%)                    | 1 (2%)                                  | 3 (10%)                                |
| Melanoma Vaccine                     | 1 (1%)                    | 0                                       | 1 (3%)                                 |
| <b>Immunotherapy type:</b>           |                           |                                         |                                        |
| Nivolumab                            | 23 (25%)                  | 18 (29%)                                | 5 (16%)                                |
| Pembrolizumab                        | 48 (51%)                  | 29 (46%)                                | 19 (61%)                               |
| Pembrolizumab/PEG-Interferon         | 21 (22%)                  | 14 (22%)                                | 7 (23%)                                |
| Anti-PD-1 (investigational)          | 2 (2%)                    | 2 (3%)                                  | 0                                      |
| <b>Immune-related Adverse Events</b> |                           |                                         |                                        |
| None                                 | 37 (39%)                  | 24 (38%)                                | 13 (42%)                               |
| Any                                  | 57 (61%)                  | 39 (62%)                                | 18 (58%)                               |
| Highest Grade Event                  |                           |                                         |                                        |
| Grade 1-2                            | 32 (34%)                  | 23 (37%)                                | 9 (29%)                                |
| Grade 3-4                            | 25 (27%)                  | 16 (25%)                                | 9 (29%)                                |

## Supplementary Table 2. Cox regression models on overall survival and progression free survival (Pittsburgh early sample cohort)

| Factors                                               | Overall Survival               |                                  | Factors                                               | Progression Free Survival      |                                  |
|-------------------------------------------------------|--------------------------------|----------------------------------|-------------------------------------------------------|--------------------------------|----------------------------------|
|                                                       | Univariate HR, 95% CI, p-value | Multivariate HR, 95% CI, p-value |                                                       | Univariate HR, 95% CI, p-value | Multivariate HR, 95% CI, p-value |
| Sex (M vs F)                                          | 1.31 (0.578 – 2.99), P=0.513   |                                  | Sex (M vs F)                                          | 1.36 (0.649 – 2.85), P=0.413   |                                  |
| Age in years<br>(≥76.51 vs <76.51)                    | 1.71 (0.799 – 3.65), P=0.162   |                                  | Age in years<br>(≥56.02 vs <56.02)                    | 0.55 (0.238 – 1.27), P=0.154   |                                  |
| BMI<br>(≥26.4 vs <26.4)                               | 0.388 (0.184 – 0.82), P=0.010  | 0.424 (0.198 – 0.909), P=0.028   | BMI<br>(≥26.4 vs <26.4)                               | 0.552 (0.278 – 1.09), P=0.084  |                                  |
| Lines of treatment<br>(≥1 vs 0)                       | 1.79 (0.423 – 7.56), P=0.423   |                                  | Lines of treatment<br>(≥1 vs 0)                       | 1.25 (0.299 – 5.22), P=0.759   |                                  |
| PPI usage (yes vs no)                                 | 2.07 (0.907 – 4.71), P=0.078   |                                  | PPI usage                                             | 2.12 (0.988 – 4.56), P=0.048   | 2.197 (1.01 – 4.80), P=0.0483    |
| LDH ratio<br>(≥1.69 vs <1.69)                         | 2.24 (0.946 – 5.28), P=0.060   |                                  | LDH ratio<br>(≥1.368 vs <1.368)                       | 1.43 (0.706 – 2.89), P=0.318   |                                  |
| Neutrophil to<br>lymphocyte ratio<br>(≥3.75 vs <3.75) | 2.4 (1.11 – 5.19), P=0.022     | 2.227 (1.025 – 4.841), P=0.043   | Neutrophil to<br>lymphocyte ratio<br>(≥3.75 vs <3.75) | 2.53 (1.23 – 5.17), P=0.009    | 2.443 (1.19 – 5.01), P=0.015     |

### Abbreviations:

HR = Hazard Ratio

95% CI = 95% Confidence Interval

p-value = Score (logrank) test two-tailed p-value

M = Male

F = Female

BMI = Body Mass Index

PPI = Proton Pump Inhibitors

LDH = Lactate Dehydrogenase

**Supplementary Table 3. Characteristics of melanoma patient cohorts from previously published studies**

| Study                              | Region   | Patient Characteristics (response breakdown)                                                                                                                                                                                                                                                                                                                | Analytic Pipeline                                                                                                                                     | Database Corrections                                                          | Duration of Follow-up                                                       | Definition of response                                                      |
|------------------------------------|----------|-------------------------------------------------------------------------------------------------------------------------------------------------------------------------------------------------------------------------------------------------------------------------------------------------------------------------------------------------------------|-------------------------------------------------------------------------------------------------------------------------------------------------------|-------------------------------------------------------------------------------|-----------------------------------------------------------------------------|-----------------------------------------------------------------------------|
| <b>Peters et al., 2019</b>         | New York | 14 metastatic melanoma patients on anti-PD1 therapy (7 non-progressors, 7 progressors) <ul style="list-style-type: none"> <li>Fecal samples analyzed by 16S and shotgun metagenomic + metatranscriptomic sequencing</li> </ul>                                                                                                                              | <ul style="list-style-type: none"> <li>16S sequencing: QIIME 2, Greengenes database</li> <li>Shotgun sequencing: MetaPhlan2, HUMAnN2</li> </ul>       | Taxa unidentified at the genus or species level removed                       | Start of therapy to progression, death, or loss to follow up (10-25 months) | PD or death from any cause vs non progression during follow-up period       |
| <b>Frankel et al., 2017</b>        | Dallas   | 14 non-resectable or metastatic melanoma patients on anti-PD1 therapy (7 non-progressors, 7 progressors) <ul style="list-style-type: none"> <li>Fecal samples analyzed by shotgun metagenomic sequencing</li> </ul>                                                                                                                                         | <ul style="list-style-type: none"> <li>MetaPhlan, HUMAnN and FMAP</li> </ul>                                                                          |                                                                               | Not reported                                                                | Response by RECIST v1.1 (CR/PR/SD vs. PD, evaluated at 3-6 month intervals) |
| <b>Matson et al., 2018</b>         | Chicago  | 38 metastatic melanoma patients on anti-PD1 therapy +4 patients on anti-CTLA-4 therapy (16 responders, 26 non-responders) <ul style="list-style-type: none"> <li>Fecal samples from 42 patients analyzed by 16S sequencing</li> <li>Fecal samples from 39 patients analyzed by shotgun metagenomic sequencing (15 responders, 24 non-responders)</li> </ul> | <ul style="list-style-type: none"> <li>16S sequencing: QIIME, NCBI database</li> <li>Shotgun sequencing: MetaPhlan2</li> </ul>                        | Composite analysis-Species identified in 16S, qPCR, and shotgun were retained | Not reported                                                                | Response by RECIST v1.1 (CR/PR any time during the study vs. no response)   |
| <b>Gopalakrishnan et al., 2018</b> | Houston  | 43 metastatic melanoma patients on anti-PD1 therapy (30 responders, 13 non-responders) <ul style="list-style-type: none"> <li>Fecal samples from 43 patients analyzed by 16S sequencing</li> <li>Fecal samples from 25 patients analyzed by shotgun metagenomic sequencing (14 responders, 11 non-responders)</li> </ul>                                    | <ul style="list-style-type: none"> <li>16S sequencing: QIIME, Greengenes, RDP, and Silva databases</li> <li>Shotgun sequencing: MetaOMiner</li> </ul> | 16S restricted to family level                                                | Not reported                                                                | Response by RECIST v1.1 (CR/PR or SD>6 months vs. PD or SD<6 months)        |

CR=complete response, PR=partial response, PD=progressive disease, SD=stable disease, FMAP=Functional Mapping and Analysis Pipeline, RECIST=Response Evaluation Criteria In Solid Tumors-version 1.1., QIIME=Quantitative Insights Into Microbial Ecology, MetaPhlan: Metagenomic Phylogenetic Analysis, HUMAnN=HMP Unified Metabolic Analysis Network, NCBI= National Center for Biotechnology Information, RDP=Ribosomal Database Project, MetaOMiner=Mining Metaomics Data.

**Supplementary Table 4. Taxa associated with improved progression free survival  
(Pittsburgh early sample cohort)**

| LKT                                  | Cutpoint | Biomarker<Cutpoint<br>n (%) | Biomarker>=Cutpoint<br>n (%) | HR     | 95% CI             | Storey q-value |
|--------------------------------------|----------|-----------------------------|------------------------------|--------|--------------------|----------------|
| LKT_s_Blautia_coccoides              | 6        | 10 (16%)                    | 53 (84%)                     | 0.223  | ( 0.104 - 0.477 )  | 0.012          |
| LKT_s_Ruminococcus_torques           | 3664     | 32 (51%)                    | 31 (49%)                     | 0.271  | ( 0.128 - 0.573 )  | 0.020          |
| LKT_s_Blautia_producta               | 86       | 20 (32%)                    | 43 (68%)                     | 0.324  | ( 0.163 - 0.644 )  | 0.020          |
| LKT_s_Absiella_dolichum              | 4        | 32 (51%)                    | 31 (49%)                     | 0.329  | ( 0.16 - 0.679 )   | 0.020          |
| LKT_s_Anaerostipes_hadrus            | 3690     | 29 (46%)                    | 34 (54%)                     | 0.358  | ( 0.178 - 0.719 )  | 0.021          |
| LKT_s_Clostridium_scindens           | 32       | 15 (24%)                    | 48 (76%)                     | 0.356  | ( 0.175 - 0.723 )  | 0.027          |
| LKT_s_Enterocloster_clostridioformis | 495      | 13 (21%)                    | 50 (79%)                     | 0.345  | ( 0.165 - 0.719 )  | 0.030          |
| LKT_s_Collinsella_intestinalis       | 40       | 50 (79%)                    | 13 (21%)                     | 0.163  | ( 0.039 - 0.682 )  | 0.038          |
| LKT_s_Enterocloster_bolteae          | 289      | 17 (27%)                    | 46 (73%)                     | 0.345  | ( 0.173 - 0.692 )  | 0.038          |
| LKT_s_Lachnospiraceae_bacterium      | 8746     | 23 (37%)                    | 40 (63%)                     | 0.372  | ( 0.189 - 0.733 )  | 0.038          |
| LKT_s_Blautia_wexlerae               | 581      | 13 (21%)                    | 50 (79%)                     | 0.379  | ( 0.18 - 0.797 )   | 0.038          |
| LKT_f_Lachnospiraceae                | 7515     | 11 (17%)                    | 52 (83%)                     | 0.268  | ( 0.124 - 0.575 )  | 0.038          |
| LKT_s_Ruminococcus_gnavus            | 693      | 14 (22%)                    | 49 (78%)                     | 0.405  | ( 0.195 - 0.839 )  | 0.045          |
| LKT_s_Bifidobacterium_bifidum        | 8        | 20 (32%)                    | 43 (68%)                     | 0.352  | ( 0.179 - 0.693 )  | 0.045          |
| LKT_s_Enterorhabdus_caecimuris       | 39       | 52 (83%)                    | 11 (17%)                     | 0.0975 | ( 0.0133 - 0.714 ) | 0.050          |
| LKT_g_Coproccoccus                   | 49       | 26 (41%)                    | 37 (59%)                     | 0.393  | ( 0.199 - 0.776 )  | 0.057          |
| LKT_s_Eisenbergiella_massiliensis    | 220      | 34 (54%)                    | 29 (46%)                     | 0.357  | ( 0.17 - 0.75 )    | 0.060          |
| LKT_s_Mogibacterium_diversum         | 9        | 35 (56%)                    | 28 (44%)                     | 0.456  | ( 0.221 - 0.938 )  | 0.060          |
| LKT_s_Anaerostipes_caccae            | 6        | 23 (37%)                    | 40 (63%)                     | 0.459  | ( 0.233 - 0.904 )  | 0.061          |
| LKT_f_Erysipelotrichaceae            | 188      | 11 (17%)                    | 52 (83%)                     | 0.3    | ( 0.138 - 0.652 )  | 0.078          |
| LKT_s_Adlercreutzia_equolifaciens    | 1547     | 52 (83%)                    | 11 (17%)                     | 0.206  | ( 0.0491 - 0.861 ) | 0.085          |
| LKT_g_Anaerostipes                   | 305      | 52 (83%)                    | 11 (17%)                     | 0.341  | ( 0.104 - 1.12 )   | 0.095          |
| LKT_s_Blautia_hydrogenotrophica      | 45       | 15 (24%)                    | 48 (76%)                     | 0.398  | ( 0.196 - 0.809 )  | 0.096          |
| LKT_s_Clostridium_methylpentosum     | 149      | 40 (63%)                    | 23 (37%)                     | 0.415  | ( 0.188 - 0.92 )   | 0.098          |

**Abbreviations:**

LKT = Last Known Taxon  
 HR = Hazard Ratio  
 95% CI = 95% Confidence Interval  
 n = number of patients

**Supplementary Table 5. Taxa associated with decreased progression free survival  
(Pittsburgh early sample cohort)**

| LKT                                      | Cutpoint | Biomarker<Cutpoint<br>n (%) | Biomarker>=Cutpoint<br>n (%) | HR   | 95% CI          | Storey q-value |
|------------------------------------------|----------|-----------------------------|------------------------------|------|-----------------|----------------|
| LKT_g_Prevotella                         | 521      | 52 (83%)                    | 11 (17%)                     | 5.1  | ( 2.4 - 10.8 )  | 0.001          |
| LKT_s_Prevotella_copri                   | 431      | 47 (75%)                    | 16 (25%)                     | 4.37 | ( 2.16 - 8.81 ) | 0.001          |
| LKT_k_Bacteria                           | 8711     | 52 (83%)                    | 11 (17%)                     | 4.87 | ( 2.26 - 10.5 ) | 0.002          |
| LKT_s_Prevotella_Unclassified            | 565      | 51 (81%)                    | 12 (19%)                     | 3.81 | ( 1.83 - 7.94 ) | 0.011          |
| LKT_s_Prevotella_buccae                  | 59       | 53 (84%)                    | 10 (16%)                     | 3.88 | ( 1.77 - 8.48 ) | 0.012          |
| LKT_s_Prevotella_koreensis               | 6        | 52 (83%)                    | 11 (17%)                     | 4.14 | ( 1.93 - 8.89 ) | 0.013          |
| LKT_s_Prevotella_oryzae                  | 3        | 53 (84%)                    | 10 (16%)                     | 3.83 | ( 1.75 - 8.37 ) | 0.020          |
| LKT_s_Parabacteroides_merdae             | 11165    | 52 (83%)                    | 11 (17%)                     | 3.61 | ( 1.66 - 7.85 ) | 0.020          |
| LKT_s_Streptomyces_Unclassified          | 59       | 31 (49%)                    | 32 (51%)                     | 3.39 | ( 1.61 - 7.13 ) | 0.020          |
| LKT_s_Veillonella_parvula                | 7        | 36 (57%)                    | 27 (43%)                     | 3.12 | ( 1.55 - 6.27 ) | 0.020          |
| LKT_s_Sporobacter_terminidis             | 39       | 38 (60%)                    | 25 (40%)                     | 3.05 | ( 1.53 - 6.08 ) | 0.020          |
| LKT_s_Lactobacillus_fermentum            | 28       | 45 (71%)                    | 18 (29%)                     | 3.01 | ( 1.51 - 5.99 ) | 0.020          |
| LKT_s_Alistipes_senegalensis             | 299      | 38 (60%)                    | 25 (40%)                     | 2.98 | ( 1.5 - 5.91 )  | 0.020          |
| LKT_g_Pseudoflavonifractor               | 124      | 37 (59%)                    | 26 (41%)                     | 2.97 | ( 1.49 - 5.91 ) | 0.020          |
| LKT_s_Bacteroidales_bacterium            | 15       | 46 (73%)                    | 17 (27%)                     | 3.01 | ( 1.49 - 6.09 ) | 0.021          |
| LKT_s_Flintibacter_Unclassified          | 150      | 48 (76%)                    | 15 (24%)                     | 2.92 | ( 1.43 - 5.96 ) | 0.021          |
| LKT_s_Fournierella_massiliensis          | 752      | 50 (79%)                    | 13 (21%)                     | 3.06 | ( 1.48 - 6.33 ) | 0.023          |
| LKT_s_Intestinimonas_butyrificiproducens | 280      | 28 (44%)                    | 35 (56%)                     | 3.63 | ( 1.68 - 7.84 ) | 0.023          |
| LKT_g_Haemophilus                        | 3        | 28 (44%)                    | 35 (56%)                     | 3.24 | ( 1.51 - 6.98 ) | 0.023          |
| LKT_s_Ruminococcus_flavofaciens          | 962      | 21 (33%)                    | 42 (67%)                     | 3.99 | ( 1.54 - 10.3 ) | 0.027          |
| LKT_g_Veillonella                        | 91       | 49 (78%)                    | 14 (22%)                     | 3.07 | ( 1.5 - 6.28 )  | 0.027          |
| LKT_s_Acinetobacter_baumanni             | 98       | 38 (60%)                    | 25 (40%)                     | 2.64 | ( 1.34 - 5.19 ) | 0.027          |
| LKT_s_Clostridium_perfringens            | 218      | 52 (83%)                    | 11 (17%)                     | 3.25 | ( 1.53 - 6.91 ) | 0.030          |
| LKT_s_Bacteroides_caccae                 | 10876    | 48 (76%)                    | 15 (24%)                     | 2.48 | ( 1.23 - 5.03 ) | 0.030          |
| LKT_s_Christensenella_minuta             | 21       | 29 (46%)                    | 34 (54%)                     | 2.78 | ( 1.32 - 5.86 ) | 0.030          |
| LKT_s_Prevotella_stercorea               | 75       | 51 (81%)                    | 12 (19%)                     | 3.24 | ( 1.53 - 6.86 ) | 0.032          |
| LKT_c_Actinobacteria                     | 157      | 38 (60%)                    | 25 (40%)                     | 2.64 | ( 1.33 - 5.22 ) | 0.033          |
| LKT_s_Prevotella_lascoiiai               | 5        | 39 (62%)                    | 24 (38%)                     | 2.51 | ( 1.27 - 4.93 ) | 0.035          |
| LKT_s_Eubacterium_pyruvivorans           | 3        | 16 (25%)                    | 47 (75%)                     | 5.17 | ( 1.57 - 17 )   | 0.037          |
| LKT_p-Proteobacteria                     | 628      | 46 (73%)                    | 17 (27%)                     | 3.11 | ( 1.56 - 6.21 ) | 0.037          |
| LKT_s_Oscillibacter_valericigenes        | 241      | 50 (79%)                    | 13 (21%)                     | 2.88 | ( 1.39 - 5.99 ) | 0.037          |
| LKT_s_Porphyromonas_uenonis              | 1        | 33 (52%)                    | 30 (48%)                     | 2.7  | ( 1.34 - 5.42 ) | 0.037          |
| LKT_s_Alistipes_dispar                   | 44       | 35 (56%)                    | 28 (44%)                     | 2.63 | ( 1.32 - 5.25 ) | 0.037          |
| LKT_Unclassified                         | 51400    | 33 (52%)                    | 30 (48%)                     | 2.66 | ( 1.32 - 5.35 ) | 0.038          |
| LKT_s_Oxalobacter_formigenes             | 7        | 49 (78%)                    | 14 (22%)                     | 2.55 | ( 1.23 - 5.28 ) | 0.038          |
| LKT_g_Klebsiella                         | 115      | 50 (79%)                    | 13 (21%)                     | 2.87 | ( 1.38 - 5.94 ) | 0.050          |
| LKT_s_Odoribacter_splanchnicus           | 2436     | 44 (70%)                    | 19 (30%)                     | 2.37 | ( 1.19 - 4.72 ) | 0.050          |
| LKT_s_Cuneatibacter_caecimuris           | 155      | 53 (84%)                    | 10 (16%)                     | 3.31 | ( 1.53 - 7.16 ) | 0.051          |
| LKT_s_Streptococcus_mutans               | 413      | 53 (84%)                    | 10 (16%)                     | 3.31 | ( 1.53 - 7.16 ) | 0.051          |
| LKT_s_Paenibacillus_Unclassified         | 52       | 40 (63%)                    | 23 (37%)                     | 2.21 | ( 1.12 - 4.36 ) | 0.051          |
| LKT_s_Anaerotruncus_massiliensis         | 916      | 51 (81%)                    | 12 (19%)                     | 2.3  | ( 1.06 - 4.95 ) | 0.052          |
| LKT_s_Lactobacillus_gasseri              | 57       | 49 (78%)                    | 14 (22%)                     | 2.38 | ( 1.16 - 4.9 )  | 0.053          |
| LKT_g_Acidaminococcus                    | 10       | 31 (49%)                    | 32 (51%)                     | 2.36 | ( 1.16 - 4.78 ) | 0.053          |
| LKT_s_Bacteroides_ilei                   | 16       | 39 (62%)                    | 24 (38%)                     | 2.35 | ( 1.19 - 4.63 ) | 0.053          |
| LKT_g_Lactobacillus                      | 25       | 20 (32%)                    | 43 (68%)                     | 2.57 | ( 1.06 - 6.22 ) | 0.056          |
| LKT_s_Odoribacter_laneus                 | 18       | 46 (73%)                    | 17 (27%)                     | 2.34 | ( 1.16 - 4.68 ) | 0.056          |
| LKT_f_Sutterellaceae                     | 5        | 34 (54%)                    | 29 (46%)                     | 2.33 | ( 1.17 - 4.64 ) | 0.057          |
| LKT_s_Agathobaculum_desmolans            | 270      | 53 (84%)                    | 10 (16%)                     | 3.1  | ( 1.43 - 6.74 ) | 0.060          |
| LKT_s_Haemophilus_Unclassified           | 1        | 20 (32%)                    | 43 (68%)                     | 2.48 | ( 1.08 - 5.7 )  | 0.060          |
| LKT_s_Agathobaculum_butyrificiproducens  | 473      | 53 (84%)                    | 10 (16%)                     | 2.29 | ( 1.03 - 5.1 )  | 0.060          |
| LKT_s_Akkermansia_muciniphila            | 5080     | 43 (68%)                    | 20 (32%)                     | 2.49 | ( 1.25 - 4.95 ) | 0.061          |
| LKT_s_Acidaminococcus_fermentans         | 4        | 24 (38%)                    | 39 (62%)                     | 2.29 | ( 1.07 - 4.92 ) | 0.063          |
| LKT_s_Oscillibacter_ruminantium          | 267      | 42 (67%)                    | 21 (33%)                     | 2.94 | ( 1.49 - 5.82 ) | 0.063          |
| LKT_s_Haemophilus_paraireinfluenzae      | 2        | 30 (48%)                    | 33 (52%)                     | 2.44 | ( 1.18 - 5.02 ) | 0.063          |
| LKT_s_Alistipes_timonensis               | 120      | 49 (78%)                    | 14 (22%)                     | 2.41 | ( 1.14 - 5.09 ) | 0.063          |
| LKT_s_Muribaculaceae_bacterium           | 34       | 51 (81%)                    | 12 (19%)                     | 2.37 | ( 1.09 - 5.12 ) | 0.063          |

|                                         |      |          |          |      |                  |       |
|-----------------------------------------|------|----------|----------|------|------------------|-------|
| LKT_s_Bacteroides_coprocola             | 29   | 30 (48%) | 33 (52%) | 1.99 | ( 0.993 - 3.97 ) | 0.063 |
| LKT_d_Eukaryota                         | 80   | 30 (48%) | 33 (52%) | 2.21 | ( 1.09 - 4.48 )  | 0.064 |
| LKT_s_Pseudoflavonifractor_Unclassified | 373  | 38 (60%) | 25 (40%) | 2.17 | ( 1.1 - 4.26 )   | 0.066 |
| LKT_s_Bacteroides_cellulosilyticus      | 225  | 16 (25%) | 47 (75%) | 2.58 | ( 0.997 - 6.68 ) | 0.075 |
| LKT_s_Veillonella_dispar                | 19   | 47 (75%) | 16 (25%) | 2.09 | ( 1.03 - 4.23 )  | 0.075 |
| LKT_s_Bacteriophage_Unclassified        | 5    | 14 (22%) | 49 (78%) | 4.19 | ( 1.28 - 13.7 )  | 0.078 |
| LKT_s_Subdoligranulum_Unclassified      | 2806 | 50 (79%) | 13 (21%) | 3.22 | ( 1.54 - 6.7 )   | 0.078 |
| LKT_s_Victivallales_bacterium           | 3    | 33 (52%) | 30 (48%) | 2.43 | ( 1.21 - 4.88 )  | 0.078 |
| LKT_s_Muribaculum_Unclassified          | 1    | 14 (22%) | 49 (78%) | 2.99 | ( 1.05 - 8.53 )  | 0.081 |
| LKT_s_Bacillus_Unclassified             | 26   | 31 (49%) | 32 (51%) | 2.41 | ( 1.19 - 4.91 )  | 0.086 |
| LKT_s_Angelakisella_massiliensis        | 101  | 14 (22%) | 49 (78%) | 4.13 | ( 1.26 - 13.6 )  | 0.096 |
| LKT_s_Duncaniella_Unclassified          | 1    | 31 (49%) | 32 (51%) | 1.96 | ( 0.978 - 3.93 ) | 0.096 |
| LKT_s_Porphyrmonas_asaccharolytica      | 3    | 44 (70%) | 19 (30%) | 1.85 | ( 0.922 - 3.72 ) | 0.100 |

**Abbreviations:**

LKT = Last Known Taxon

HR = Hazard Ratio

95% CI = 95% Confidence Interval

n = number of patients



**Supplemental Table 6. Cox regression models for immune related adverse effects (Pittsburgh early sample cohort, landmark analysis, time 10 months)**

| irAE                                            | Samples in irAE group<br>(n in no irAE = 25) | Overall Survival               | Progression Free Survival      |
|-------------------------------------------------|----------------------------------------------|--------------------------------|--------------------------------|
|                                                 |                                              | Univariate HR, 95% CI, p-value | Univariate HR, 95% CI, p-value |
| Grade 1-4 vs no irAE reported                   | 28                                           | 0.464 (0.180 - 1.20), P=0.104  | 0.403 (0.175 - 0.926), P=0.027 |
| Grade 1-2 only <sup>#</sup> vs no irAE-reported | 18                                           | 0.530 (0.184 - 1.53), P=0.232  | 0.317 (0.114 - 0.877), P=0.020 |
| Grade 3-4 only <sup>#</sup> vs no irAE-reported | 7                                            | 0.565 (0.125 - 2.55), P=0.452  | 0.623 (0.180 - 2.160), P=0.452 |
| Grade 3-4 all vs no irAE-reported               | 10                                           | 0.365 (0.080 - 1.65), P=0.173  | 0.601 (0.199 - 1.820), P=0.361 |

Patients alive at the landmark time (10 months) were analyzed. An irAE was considered to be present if developed before the landmark time.

<sup>#</sup>Patients who developed the other grade irAE before landmark time are excluded.

**Abbreviations:**

HR = Hazard Ratio

95% CI = 95% Confidence Interval

p-value = Score (logrank) test two-tailed p-value

# Supplementar Table 7. Linear discrimination analysis scores of differentially abundant taxa from five separate anti-PD-1-treated melanoma patient cohorts

| Taxa                                                                                                                                                                 | Abundance | Class         | LDA score | p-value |
|----------------------------------------------------------------------------------------------------------------------------------------------------------------------|-----------|---------------|-----------|---------|
| k__Bacteria; p__Actinobacteria; c__Actinobacteria; o__Corynebacteriales; f__Mycobacteriaceae; g__Unclassified                                                        | 1.440     | Non_Responder | 2.072     | 0.015   |
| k__Bacteria; p__Actinobacteria; c__Actinobacteria; o__Corynebacteriales; f__Mycobacteriaceae; g__Unclassified; LKT_f__Mycobacteriaceae                               | 1.440     | Non_Responder | 2.072     | 0.015   |
| k__Bacteria; p__Bacteroidetes; c__Bacteroidia; o__Bacteroidales; f__Bacteroidaceae; g__Bacteroides; LKT_s__Bacteroides_cellulosilyticus                              | 4.273     | Non_Responder | 3.716     | 0.013   |
| k__Bacteria; p__Bacteroidetes; c__Bacteroidia; o__Bacteroidales; f__Bacteroidaceae; g__Bacteroides; LKT_s__Bacteroides_fragilis                                      | 4.216     | Non_Responder | 3.425     | 0.040   |
| k__Bacteria; p__Bacteroidetes; c__Bacteroidia; o__Bacteroidales; f__Bacteroidaceae; g__Bacteroides; LKT_s__Bacteroides_intestinalis                                  | 4.274     | Non_Responder | 3.422     | 0.031   |
| k__Bacteria; p__Bacteroidetes; c__Bacteroidia; o__Bacteroidales; f__Odoribacteraceae                                                                                 | 4.095     | Non_Responder | 3.265     | 0.014   |
| k__Bacteria; p__Bacteroidetes; c__Bacteroidia; o__Bacteroidales; f__Odoribacteraceae; g__Butyricimonas                                                               | 3.400     | Non_Responder | 2.566     | 0.044   |
| k__Bacteria; p__Bacteroidetes; c__Bacteroidia; o__Bacteroidales; f__Odoribacteraceae; g__Butyricimonas; LKT_s__Butyricimonas_virosa                                  | 3.054     | Non_Responder | 2.263     | 0.047   |
| k__Bacteria; p__Bacteroidetes; c__Bacteroidia; o__Bacteroidales; f__Odoribacteraceae; g__Odoribacter                                                                 | 3.964     | Non_Responder | 3.183     | 0.015   |
| k__Bacteria; p__Bacteroidetes; c__Bacteroidia; o__Bacteroidales; f__Odoribacteraceae; g__Odoribacter; LKT_g__Odoribacter                                             | 2.963     | Non_Responder | 2.374     | 0.047   |
| k__Bacteria; p__Bacteroidetes; c__Bacteroidia; o__Bacteroidales; f__Odoribacteraceae; g__Odoribacter; LKT_s__Odoribacter_laneus                                      | 3.132     | Non_Responder | 2.722     | 0.009   |
| k__Bacteria; p__Bacteroidetes; c__Bacteroidia; o__Bacteroidales; f__Odoribacteraceae; g__Odoribacter; LKT_s__Odoribacter_splanchnicus                                | 3.822     | Non_Responder | 3.069     | 0.048   |
| k__Bacteria; p__Bacteroidetes; c__Bacteroidia; o__Bacteroidales; f__Prevotellaceae                                                                                   | 4.454     | Non_Responder | 3.822     | 0.003   |
| k__Bacteria; p__Bacteroidetes; c__Bacteroidia; o__Bacteroidales; f__Prevotellaceae; g__Prevotella                                                                    | 4.397     | Non_Responder | 3.781     | 0.002   |
| k__Bacteria; p__Bacteroidetes; c__Bacteroidia; o__Bacteroidales; f__Prevotellaceae; g__Prevotella; LKT_g__Prevotella                                                 | 2.899     | Non_Responder | 2.443     | 0.031   |
| k__Bacteria; p__Bacteroidetes; c__Bacteroidia; o__Bacteroidales; f__Prevotellaceae; g__Prevotella; LKT_s__Prevotella_copri                                           | 4.044     | Non_Responder | 3.457     | 0.000   |
| k__Bacteria; p__Bacteroidetes; c__Bacteroidia; o__Bacteroidales; f__Prevotellaceae; g__Prevotella; LKT_s__Prevotella_lascolai                                        | 2.876     | Non_Responder | 2.361     | 0.001   |
| k__Bacteria; p__Bacteroidetes; c__Bacteroidia; o__Bacteroidales; f__Prevotellaceae; g__Prevotella; LKT_s__Prevotella_ruminicola                                      | 2.561     | Non_Responder | 2.084     | 0.003   |
| k__Bacteria; p__Bacteroidetes; c__Bacteroidia; o__Bacteroidales; f__Prevotellaceae; g__Prevotella; LKT_s__Prevotella_stercora                                        | 3.270     | Non_Responder | 2.764     | 0.000   |
| k__Bacteria; p__Bacteroidetes; c__Bacteroidia; o__Bacteroidales; f__Prevotellaceae; g__Prevotella; LKT_s__Prevotella_Unclassified                                    | 3.927     | Non_Responder | 3.404     | 0.000   |
| k__Bacteria; p__Bacteroidetes; c__Bacteroidia; o__Bacteroidales; f__Prevotellaceae; g__Prevotellamassilia                                                            | 2.593     | Non_Responder | 2.172     | 0.000   |
| k__Bacteria; p__Bacteroidetes; c__Bacteroidia; o__Bacteroidales; f__Prevotellaceae; g__Prevotellamassilia; LKT_s__Prevotellamassilia_timonensis                      | 2.593     | Non_Responder | 2.172     | 0.000   |
| k__Bacteria; p__Bacteroidetes; c__Bacteroidia; o__Bacteroidales; f__Rikenellaceae                                                                                    | 4.794     | Non_Responder | 4.031     | 0.043   |
| k__Bacteria; p__Bacteroidetes; c__Bacteroidia; o__Bacteroidales; f__Rikenellaceae; g__Alistipes                                                                      | 4.791     | Non_Responder | 4.038     | 0.037   |
| k__Bacteria; p__Bacteroidetes; c__Bacteroidia; o__Bacteroidales; f__Rikenellaceae; g__Alistipes; LKT_g__Alistipes                                                    | 3.208     | Non_Responder | 2.382     | 0.021   |
| k__Bacteria; p__Bacteroidetes; c__Bacteroidia; o__Bacteroidales; f__Rikenellaceae; g__Alistipes; LKT_s__Alistipes_obesi                                              | 3.572     | Non_Responder | 2.942     | 0.019   |
| k__Bacteria; p__Bacteroidetes; c__Bacteroidia; o__Bacteroidales; f__Rikenellaceae; g__Alistipes; LKT_s__Alistipes_seneegalensis                                      | 3.659     | Non_Responder | 2.980     | 0.034   |
| k__Bacteria; p__Bacteroidetes; c__Bacteroidia; o__Bacteroidales; f__Rikenellaceae; g__Alistipes; LKT_s__Alistipes_timonensis                                         | 3.183     | Non_Responder | 2.554     | 0.005   |
| k__Bacteria; p__Bacteroidetes; c__Bacteroidia; o__Bacteroidales; f__Rikenellaceae; g__Alistipes; LKT_s__Alistipes_Unclassified                                       | 4.123     | Non_Responder | 3.441     | 0.028   |
| k__Bacteria; p__Firmicutes; c__Bacilli; o__Bacillales; f__Planococcaceae; g__Rummeliibacillus                                                                        | 0.745     | Non_Responder | 2.025     | 0.027   |
| k__Bacteria; p__Firmicutes; c__Bacilli; o__Bacillales; f__Planococcaceae; g__Rummeliibacillus; LKT_s__Rummeliibacillus_pyncus                                        | 0.745     | Non_Responder | 2.025     | 0.027   |
| k__Bacteria; p__Firmicutes; c__Bacilli; o__Lactobacillales; f__Lactobacillaceae; g__Lactobacillus                                                                    | 2.534     | Non_Responder | 2.362     | 0.001   |
| k__Bacteria; p__Firmicutes; c__Clostridia; o__Clostridiales; f__Oscillospiraceae; g__Unclassified                                                                    | 3.448     | Non_Responder | 2.193     | 0.038   |
| k__Bacteria; p__Firmicutes; c__Clostridia; o__Clostridiales; f__Oscillospiraceae; g__Unclassified; LKT_f__Oscillospiraceae                                           | 3.448     | Non_Responder | 2.193     | 0.038   |
| k__Bacteria; p__Firmicutes; c__Clostridia; o__Clostridiales; f__Ruminococcaceae; g__Unclassified                                                                     | 3.537     | Non_Responder | 2.571     | 0.027   |
| k__Bacteria; p__Firmicutes; c__Clostridia; o__Clostridiales; f__Ruminococcaceae; g__Unclassified; LKT_f__Ruminococcaceae                                             | 3.537     | Non_Responder | 2.571     | 0.027   |
| k__Bacteria; p__Proteobacteria; c__Deltaproteobacteria; o__Desulfufovibrionales; f__Desulfufovibrionaceae; g__Desulfufovibrio                                        | 3.285     | Non_Responder | 2.511     | 0.038   |
| k__Bacteria; p__Proteobacteria; c__Deltaproteobacteria; o__Desulfufovibrionales; f__Desulfufovibrionaceae; g__Desulfufovibrio; LKT_s__Desulfufovibrio_fairfieldensis | 2.730     | Non_Responder | 2.181     | 0.034   |
| k__Bacteria; p__Proteobacteria; c__Gammaproteobacteria; o__Aeromonadales; f__Aeromonadaceae; g__Aeromonas; LKT_s__Aeromonas_veronii                                  | 1.304     | Non_Responder | 2.022     | 0.047   |
| k__Bacteria; p__Verrucomicrobia                                                                                                                                      | 4.217     | Non_Responder | 3.302     | 0.005   |
| k__Bacteria; p__Verrucomicrobia; c__Verrucomicrobiae                                                                                                                 | 4.217     | Non_Responder | 3.302     | 0.005   |
| k__Bacteria; p__Verrucomicrobia; c__Verrucomicrobiae; o__Verrucomicrobiales                                                                                          | 4.217     | Non_Responder | 3.302     | 0.005   |
| k__Bacteria; p__Verrucomicrobia; c__Verrucomicrobiae; o__Verrucomicrobiales; f__Akkermansiaceae                                                                      | 4.217     | Non_Responder | 3.302     | 0.005   |
| k__Bacteria; p__Verrucomicrobia; c__Verrucomicrobiae; o__Verrucomicrobiales; f__Akkermansiaceae; g__Akkermansia                                                      | 4.217     | Non_Responder | 3.302     | 0.005   |
| k__Bacteria; p__Verrucomicrobia; c__Verrucomicrobiae; o__Verrucomicrobiales; f__Akkermansiaceae; g__Akkermansia; LKT_g__Akkermansia                                  | 3.263     | Non_Responder | 2.719     | 0.045   |
| k__Bacteria; p__Verrucomicrobia; c__Verrucomicrobiae; o__Verrucomicrobiales; f__Akkermansiaceae; g__Akkermansia; LKT_s__Akkermansia_muciniphila                      | 4.166     | Non_Responder | 3.269     | 0.005   |
| k__Bacteria; p__Actinobacteria; c__Actinobacteria; o__Actinomycetales                                                                                                | 2.739     | Responder     | 2.038     | 0.008   |
| k__Bacteria; p__Actinobacteria; c__Actinobacteria; o__Actinomycetales; f__Actinomycetaceae                                                                           | 2.739     | Responder     | 2.038     | 0.008   |
| k__Bacteria; p__Actinobacteria; c__Actinobacteria; o__Actinomycetales; f__Actinomycetaceae; g__Unclassified                                                          | 0.195     | Responder     | 2.654     | 0.000   |
| k__Bacteria; p__Actinobacteria; c__Actinobacteria; o__Actinomycetales; f__Actinomycetaceae; g__Unclassified; LKT_f__Actinomycetaceae                                 | 0.195     | Responder     | 2.654     | 0.000   |
| k__Bacteria; p__Actinobacteria; c__Actinobacteria; o__Bifidobacteriales; f__Bifidobacteriaceae; g__Bifidobacterium; LKT_s__Bifidobacterium_pseudocatenulatum         | 3.033     | Responder     | 2.585     | 0.030   |
| k__Bacteria; p__Actinobacteria; c__Actinobacteria; o__Micrococcales; f__Promicromonosporaceae                                                                        | 0.991     | Responder     | 2.093     | 0.001   |
| k__Bacteria; p__Actinobacteria; c__Actinobacteria; o__Micrococcales; f__Promicromonosporaceae; g__Xylanimonas                                                        | 0.991     | Responder     | 2.093     | 0.001   |
| k__Bacteria; p__Actinobacteria; c__Actinobacteria; o__Micrococcales; f__Promicromonosporaceae; g__Xylanimonas; LKT_s__Xylanimonas_cellulosilytica                    | 0.991     | Responder     | 2.093     | 0.001   |
| k__Bacteria; p__Actinobacteria; c__Actinobacteria; o__Micrococcales; f__Sanguibacteraceae                                                                            | 0.883     | Responder     | 2.147     | 0.002   |
| k__Bacteria; p__Actinobacteria; c__Actinobacteria; o__Micrococcales; f__Sanguibacteraceae; g__Sanguibacter                                                           | 0.883     | Responder     | 2.147     | 0.002   |
| k__Bacteria; p__Actinobacteria; c__Actinobacteria; o__Micrococcales; f__Sanguibacteraceae; g__Sanguibacter; LKT_s__Sanguibacter_keddiei                              | 0.883     | Responder     | 2.147     | 0.002   |
| k__Bacteria; p__Bacteroidetes; c__Bacteroidia; o__Bacteroidales; f__Prevotellaceae; g__Prevotella; LKT_s__Prevotella_buccae                                          | 2.996     | Responder     | 2.529     | 0.028   |
| k__Bacteria; p__Bacteroidetes; c__Bacteroidia; o__Bacteroidales; f__Prevotellaceae; g__Prevotella; LKT_s__Prevotella_tindicola                                       | 2.619     | Responder     | 2.118     | 0.007   |
| k__Bacteria; p__Firmicutes                                                                                                                                           | 5.647     | Responder     | 4.557     | 0.001   |
| k__Bacteria; p__Firmicutes; c__Bacilli; o__Lactobacillales; f__Lactobacillaceae; g__Lactobacillus; LKT_s__Lactobacillus_acidophilus                                  | 0.803     | Responder     | 2.008     | 0.022   |
| k__Bacteria; p__Firmicutes; c__Bacilli; o__Lactobacillales; f__Streptococcaceae; g__Streptococcus; LKT_g__Streptococcus                                              | 2.569     | Responder     | 2.006     | 0.037   |
| k__Bacteria; p__Firmicutes; c__Clostridia                                                                                                                            | 5.602     | Responder     | 4.530     | 0.002   |
| k__Bacteria; p__Firmicutes; c__Clostridia; o__Clostridiales                                                                                                          | 5.602     | Responder     | 4.530     | 0.002   |
| k__Bacteria; p__Firmicutes; c__Clostridia; o__Clostridiales; f__Clostridiaceae; g__Butyricoccus                                                                      | 3.548     | Responder     | 2.533     | 0.049   |
| k__Bacteria; p__Firmicutes; c__Clostridia; o__Clostridiales; f__Clostridiaceae; g__Clostridium; LKT_g__Clostridium                                                   | 3.593     | Responder     | 2.623     | 0.027   |
| k__Bacteria; p__Firmicutes; c__Clostridia; o__Clostridiales; f__Clostridiaceae; g__Clostridium; LKT_s__Clostridium_cadaveris                                         | 1.053     | Responder     | 2.132     | 0.034   |
| k__Bacteria; p__Firmicutes; c__Clostridia; o__Clostridiales; f__Clostridiaceae; g__Clostridium; LKT_s__Clostridium_kluuyeri                                          | 1.084     | Responder     | 2.070     | 0.020   |
| k__Bacteria; p__Firmicutes; c__Clostridia; o__Clostridiales; f__Clostridiaceae; g__Clostridium; LKT_s__Clostridium_Unclassified                                      | 4.326     | Responder     | 3.203     | 0.041   |
| k__Bacteria; p__Firmicutes; c__Clostridia; o__Clostridiales; f__Clostridiaceae; g__Missing                                                                           | 2.925     | Responder     | 2.001     | 0.001   |
| k__Bacteria; p__Firmicutes; c__Clostridia; o__Clostridiales; f__Clostridiaceae; g__Missing; LKT_s__Clostridiaceae_bacterium                                          | 2.925     | Responder     | 2.003     | 0.001   |
| k__Bacteria; p__Firmicutes; c__Clostridia; o__Clostridiales; f__Eubacteriaceae; g__Eubacterium; LKT_s__Eubacterium_ventriosum                                        | 3.155     | Responder     | 2.087     | 0.036   |
| k__Bacteria; p__Firmicutes; c__Clostridia; o__Clostridiales; f__Lachnospiraceae                                                                                      | 5.240     | Responder     | 4.295     | 0.001   |
| k__Bacteria; p__Firmicutes; c__Clostridia; o__Clostridiales; f__Lachnospiraceae; g__Anaerostipes                                                                     | 3.493     | Responder     | 2.726     | 0.013   |
| k__Bacteria; p__Firmicutes; c__Clostridia; o__Clostridiales; f__Lachnospiraceae; g__Anaerostipes; LKT_s__Anaerostipes_hadrus                                         | 3.429     | Responder     | 2.715     | 0.039   |
| k__Bacteria; p__Firmicutes; c__Clostridia; o__Clostridiales; f__Lachnospiraceae; g__Blautia                                                                          | 4.667     | Responder     | 3.738     | 0.008   |
| k__Bacteria; p__Firmicutes; c__Clostridia; o__Clostridiales; f__Lachnospiraceae; g__Blautia; LKT_g__Blautia                                                          | 3.708     | Responder     | 2.821     | 0.006   |
| k__Bacteria; p__Firmicutes; c__Clostridia; o__Clostridiales; f__Lachnospiraceae; g__Blautia; LKT_s__Blautia_hansenii                                                 | 3.670     | Responder     | 2.856     | 0.005   |
| k__Bacteria; p__Firmicutes; c__Clostridia; o__Clostridiales; f__Lachnospiraceae; g__Blautia; LKT_s__Blautia_massiliensis                                             | 2.950     | Responder     | 2.287     | 0.020   |
| k__Bacteria; p__Firmicutes; c__Clostridia; o__Clostridiales; f__Lachnospiraceae; g__Blautia; LKT_s__Blautia_oboem                                                    | 3.960     | Responder     | 2.775     | 0.042   |
| k__Bacteria; p__Firmicutes; c__Clostridia; o__Clostridiales; f__Lachnospiraceae; g__Blautia; LKT_s__Blautia_producta                                                 | 3.231     | Responder     | 2.508     | 0.009   |
| k__Bacteria; p__Firmicutes; c__Clostridia; o__Clostridiales; f__Lachnospiraceae; g__Blautia; LKT_s__Blautia_Unclassified                                             | 4.072     | Responder     | 3.123     | 0.004   |
| k__Bacteria; p__Firmicutes; c__Clostridia; o__Clostridiales; f__Lachnospiraceae; g__Blautia; LKT_s__Blautia_wexlerae                                                 | 3.361     | Responder     | 2.587     | 0.007   |
| k__Bacteria; p__Firmicutes; c__Clostridia; o__Clostridiales; f__Lachnospiraceae; g__Blautia; LKT_s__Ruminococcus_gnavus                                              | 3.751     | Responder     | 3.091     | 0.007   |
| k__Bacteria; p__Firmicutes; c__Clostridia; o__Clostridiales; f__Lachnospiraceae; g__Butyrivibrio                                                                     | 3.581     | Responder     | 2.994     | 0.032   |
| k__Bacteria; p__Firmicutes; c__Clostridia; o__Clostridiales; f__Lachnospiraceae; g__Butyrivibrio; LKT_s__Butyrivibrio_crosotus                                       | 3.343     | Responder     | 2.947     | 0.000   |
| k__Bacteria; p__Firmicutes; c__Clostridia; o__Clostridiales; f__Lachnospiraceae; g__Butyrivibrio; LKT_s__Butyrivibrio_fibrisolvens                                   | 1.542     | Responder     | 2.169     | 0.010   |
| k__Bacteria; p__Firmicutes; c__Clostridia; o__Clostridiales; f__Lachnospiraceae; g__Butyrivibrio; LKT_s__Butyrivibrio_proteoclasticus                                | 1.696     | Responder     | 2.017     | 0.005   |
| k__Bacteria; p__Firmicutes; c__Clostridia; o__Clostridiales; f__Lachnospiraceae; g__Coprococcus; LKT_s__Coprococcus_Unclassified                                     | 2.835     | Responder     | 2.087     | 0.000   |
| k__Bacteria; p__Firmicutes; c__Clostridia; o__Clostridiales; f__Lachnospiraceae; g__Dorea; LKT_s__Dorea_formicigenans                                                | 3.411     | Responder     | 2.650     | 0.003   |
| k__Bacteria; p__Firmicutes; c__Clostridia; o__Clostridiales; f__Lachnospiraceae; g__Dorea; LKT_s__Dorea_Unclassified                                                 | 3.048     | Responder     | 2.116     | 0.008   |
| k__Bacteria; p__Firmicutes; c__Clostridia; o__Clostridiales; f__Lachnospiraceae; g__Lachnoclostridium                                                                | 3.988     | Responder     | 2.893     | 0.037   |
| k__Bacteria; p__Firmicutes; c__Clostridia; o__Clostridiales; f__Lachnospiraceae; g__Lachnoclostridium; LKT_s__Lachnoclostridium_phytofermentans                      | 1.310     | Responder     | 2.170     | 0.013   |
| k__Bacteria; p__Firmicutes; c__Clostridia; o__Clostridiales; f__Lachnospiraceae; g__Missing                                                                          | 4.655     | Responder     | 3.843     | 0.001   |
| k__Bacteria; p__Firmicutes; c__Clostridia; o__Clostridiales; f__Lachnospiraceae; g__Missing; LKT_s__Eubacterium_rectale                                              | 4.455     | Responder     | 3.717     | 0.001   |
| k__Bacteria; p__Firmicutes; c__Clostridia; o__Clostridiales; f__Lachnospiraceae; g__Missing; LKT_s__Lachnospiraceae_bacterium                                        | 4.222     | Responder     | 3.244     | 0.040   |
| k__Bacteria; p__Firmicutes; c__Clostridia; o__Clostridiales; f__Lachnospiraceae; g__Roseburia                                                                        | 4.424     | Responder     | 3.374     | 0.009   |
| k__Bacteria; p__Firmicutes; c__Clostridia; o__Clostridiales; f__Lachnospiraceae; g__Roseburia; LKT_g__Roseburia                                                      | 3.209     | Responder     | 2.484     | 0.000   |
| k__Bacteria; p__Firmicutes; c__Clostridia; o__Clostridiales; f__Lachnospiraceae; g__Roseburia; LKT_s__Roseburia_faecis                                               | 3.269     | Responder     | 2.466     | 0.028   |
| k__Bacteria; p__Firmicutes; c__Clostridia; o__Clostridiales; f__Lachnospiraceae; g__Roseburia; LKT_s__Roseburia_hominis                                              | 3.657     | Responder     | 2.780     | 0.022   |
| k__Bacteria; p__Firmicutes; c__Clostridia; o__Clostridiales; f__Lachnospiraceae; g__Roseburia; LKT_s__Roseburia_Unclassified                                         | 3.777     | Responder     | 3.017     | 0.001   |
| k__Bacteria; p__Firmicutes; c__Clostridia; o__Clostridiales; f__Lachnospiraceae; g__Sellimonas                                                                       | 3.358     | Responder     | 2.799     | 0.007   |
| k__Bacteria; p__Firmicutes; c__Clostridia; o__Clostridiales; f__Lachnospiraceae; g__Sellimonas; LKT_s__Sellimonas_intestinalis                                       | 3.358     | Responder     | 2.799     | 0.007   |

|                                                                                                                                                              |       |           |       |       |
|--------------------------------------------------------------------------------------------------------------------------------------------------------------|-------|-----------|-------|-------|
| k__Bacteria; p__Firmicutes; c__Clostridia; o__Clostridiales; f__Peptococcaceae; g__Desulfotomaculum; LKT__s__Desulfotomaculum_Unclassified                   | 1.572 | Responder | 2.011 | 0.002 |
| k__Bacteria; p__Firmicutes; c__Clostridia; o__Clostridiales; f__Peptostreptococcaceae; g__Clostridioides                                                     | 3.197 | Responder | 2.055 | 0.003 |
| k__Bacteria; p__Firmicutes; c__Clostridia; o__Clostridiales; f__Peptostreptococcaceae; g__Clostridioides; LKT__s__Clostridioides_difficile                   | 3.197 | Responder | 2.055 | 0.003 |
| k__Bacteria; p__Firmicutes; c__Clostridia; o__Clostridiales; f__Ruminococcaceae                                                                              | 5.130 | Responder | 4.033 | 0.046 |
| k__Bacteria; p__Firmicutes; c__Erysipelotrichia                                                                                                              | 3.928 | Responder | 3.014 | 0.044 |
| k__Bacteria; p__Firmicutes; c__Erysipelotrichia; o__Erysipelotrichales                                                                                       | 3.928 | Responder | 3.014 | 0.044 |
| k__Bacteria; p__Firmicutes; c__Erysipelotrichia; o__Erysipelotrichales; f__Erysipelotrichaceae                                                               | 3.928 | Responder | 3.014 | 0.044 |
| k__Bacteria; p__Firmicutes; c__Erysipelotrichia; o__Erysipelotrichales; f__Erysipelotrichaceae; g__Catenibacterium                                           | 2.577 | Responder | 2.147 | 0.035 |
| k__Bacteria; p__Firmicutes; c__Erysipelotrichia; o__Erysipelotrichales; f__Erysipelotrichaceae; g__Catenibacterium; LKT__g__Catenibacterium                  | 2.577 | Responder | 2.147 | 0.035 |
| k__Bacteria; p__Firmicutes; c__Erysipelotrichia; o__Erysipelotrichales; f__Erysipelotrichaceae; g__Coprobaecillus; LKT__g__Coprobaecillus                    | 2.975 | Responder | 2.320 | 0.012 |
| k__Bacteria; p__Firmicutes; c__Erysipelotrichia; o__Erysipelotrichales; f__Erysipelotrichaceae; g__Coprobaecillus; LKT__s__Coprobaecillus_Unclassified       | 3.071 | Responder | 2.438 | 0.007 |
| k__Bacteria; p__Firmicutes; c__Erysipelotrichia; o__Erysipelotrichales; f__Erysipelotrichaceae; g__Turicibacter; LKT__g__Turicibacter                        | 1.309 | Responder | 2.452 | 0.002 |
| k__Bacteria; p__Firmicutes; c__Negativicutes; o__Selenomonadales; f__Selenomonadaceae; g__Megamonas                                                          | 2.980 | Responder | 2.620 | 0.034 |
| k__Bacteria; p__Firmicutes; c__Negativicutes; o__Selenomonadales; f__Selenomonadaceae; g__Megamonas; LKT__g__Megamonas                                       | 2.182 | Responder | 2.007 | 0.028 |
| k__Bacteria; p__Firmicutes; c__Negativicutes; o__Selenomonadales; f__Selenomonadaceae; g__Megamonas; LKT__s__Megamonas_rupellensis                           | 2.487 | Responder | 2.171 | 0.004 |
| k__Bacteria; p__Firmicutes; c__Negativicutes; o__Veillonellales                                                                                              | 3.597 | Responder | 2.936 | 0.049 |
| k__Bacteria; p__Firmicutes; c__Negativicutes; o__Veillonellales; f__Veillonellaceae                                                                          | 3.597 | Responder | 2.936 | 0.049 |
| k__Bacteria; p__Firmicutes; c__Tissierellia; o__Tissierellales; f__Peptoniphilaceae; g__Anaerococcus; LKT__g__Anaerococcus                                   | 1.305 | Responder | 2.145 | 0.008 |
| k__Bacteria; p__Firmicutes; c__Tissierellia; o__Tissierellales; f__Peptoniphilaceae; g__Anaerococcus; LKT__s__Anaerococcus_vaginalis                         | 0.475 | Responder | 2.339 | 0.011 |
| k__Bacteria; p__Firmicutes; c__Tissierellia; o__Tissierellales; f__Peptoniphilaceae; g__Finegoldia                                                           | 0.925 | Responder | 2.274 | 0.011 |
| k__Bacteria; p__Firmicutes; c__Tissierellia; o__Tissierellales; f__Peptoniphilaceae; g__Finegoldia; LKT__s__Finegoldia_magna                                 | 0.925 | Responder | 2.274 | 0.011 |
| k__Bacteria; p__Fusobacteria; c__Fusobacteria; o__Fusobacteriales; f__Fusobacteriaceae; g__Fusobacterium; LKT__s__Fusobacterium_varium                       | 1.730 | Responder | 2.181 | 0.001 |
| k__Bacteria; p__Proteobacteria; c__Betaproteobacteria; o__Burkholderiales; f__Comamonadaceae; g__Variovorax; LKT__g__Variovorax                              | 0.141 | Responder | 3.018 | 0.002 |
| k__Bacteria; p__Proteobacteria; c__Betaproteobacteria; o__Burkholderiales; f__Oxalobacteraceae; g__Janthinobacterium; LKT__s__Janthinobacterium_Unclassified | 0.852 | Responder | 2.383 | 0.048 |

Linear discrimination analysis (LDA) scores computed for differentially abundant taxa calculated on batch-corrected metagenomic data obtained from five combined melanoma patient cohorts. Taxa with  $p \leq 0.05$  for the Kruskal-Wallis H statistic and LDA score  $> 2$  are listed.

**Supplementary Table 8. Continuous variable Cox regression models (Pittsburgh full cohort)**

| Taxa Associated with Decreased PFS | beta   | HR (95% CI for HR)    | Storey q-value |
|------------------------------------|--------|-----------------------|----------------|
| LKT_s_Absiella_dolichum            | -0.280 | 0.75543 (0.633-0.902) | 0.04           |
| LKT_s_Ruminococcus_gnavus          | -0.224 | 0.79927 (0.692-0.923) | 0.05           |
| LKT_s_Mogibacterium_diversum       | -0.204 | 0.81523 (0.712-0.934) | 0.06           |
| LKT_s_Blautia_coccoides            | -0.217 | 0.80514 (0.694-0.934) | 0.07           |
| LKT_s_Blautia_producta             | -0.191 | 0.82575 (0.721-0.946) | 0.08           |
| LKT_g_Blautia                      | -0.266 | 0.76658 (0.632-0.93)  | 0.08           |
| LKT_s_Lachnospiraceae_bacterium    | -0.265 | 0.76697 (0.633-0.93)  | 0.08           |
| LKT_f_Lachnospiraceae              | -0.431 | 0.64976 (0.469-0.9)   | 0.11           |

| Taxa Associated with Increased PFS  | beta  | HR (95% CI for HR) | Storey q-value |
|-------------------------------------|-------|--------------------|----------------|
| LKT_s_Prevotella_oryzae             | 0.199 | 1.2204 (1.11-1.34) | 0.01           |
| LKT_s_Prevotella_lascolaii          | 0.131 | 1.1401 (1.06-1.22) | 0.01           |
| LKT_g_Prevotella                    | 0.188 | 1.2063 (1.09-1.33) | 0.01           |
| LKT_s_Prevotella_koreensis          | 0.202 | 1.2236 (1.1-1.36)  | 0.01           |
| LKT_s_Oxalobacter_formigenes        | 0.242 | 1.2741 (1.12-1.45) | 0.01           |
| LKT_s_Prevotella_stercorea          | 0.123 | 1.1304 (1.05-1.21) | 0.03           |
| LKT_s_Prevotella_Unclassified       | 0.125 | 1.1333 (1.05-1.22) | 0.03           |
| LKT_s_Prevotella_copri              | 0.102 | 1.107 (1.04-1.18)  | 0.04           |
| LKT_s_Prevotella_buccae             | 0.120 | 1.1274 (1.05-1.21) | 0.04           |
| LKT_s_Bacteroides_caccae            | 0.150 | 1.1614 (1.05-1.29) | 0.07           |
| LKT_k_Bacteria                      | 0.733 | 2.0817 (1.24-3.5)  | 0.08           |
| LKT_s_Lactobacillus_paracasei       | 0.115 | 1.122 (1.03-1.22)  | 0.11           |
| LKT_s_Acinetobacter_baumannii       | 0.177 | 1.1931 (1.04-1.36) | 0.11           |
| LKT_s_Acidaminococcus_fermentans    | 0.154 | 1.1659 (1.04-1.31) | 0.11           |
| LKT_s_Lactobacillus_rhamnosus       | 0.122 | 1.1296 (1.02-1.25) | 0.14           |
| LKT_s_Bacillus_Unclassified         | 0.199 | 1.2196 (1.04-1.43) | 0.14           |
| LKT_s_Faecalibacterium_Unclassified | 0.130 | 1.1385 (1.02-1.27) | 0.19           |

**Abbreviations:**

LKT = Last Known Taxon

PFS = Progression Free Survival

HR = Hazard Ratio

95% CI = 95% Confidence Interval

## Supplementary Table 9. Differentially abundant taxa between different clusters from American Gut Project dataset identified using PhenoGraph R package

| Taxa                                                                                                                                  | Microbiotype_classification | LDA score (log10) | p-value         |
|---------------------------------------------------------------------------------------------------------------------------------------|-----------------------------|-------------------|-----------------|
| k_Bacteria.p_Actinobacteria                                                                                                           | Beneficial I                | 3.819243502       | 3.29E-39        |
| k_Bacteria.p_Actinobacteria.c_Bifidobacteriales                                                                                       | Beneficial I                | 3.691189427       | 4.16E-12        |
| k_Bacteria.p_Actinobacteria.c_Bifidobacteriales.o_Bifidobacteriaceae                                                                  | Beneficial I                | 3.691189427       | 4.16E-12        |
| k_Bacteria.p_Actinobacteria.c_Bifidobacteriales.o_Bifidobacteriaceae.f_Bifidobacterium                                                | Beneficial I                | 3.689824886       | 9.05E-11        |
| k_Bacteria.p_Actinobacteria.c_Bifidobacteriales.o_Bifidobacteriaceae.f_Bifidobacterium.g_Bifidobacterium                              | Beneficial I                | 3.689824886       | 9.05E-11        |
| k_Bacteria.p_Bacteroidetes.c_Bacteroidia.o_Bacteroidales.f_Bacteroidaceae                                                             | Beneficial I                | 4.70242304        | 4.08E-77        |
| k_Bacteria.p_Bacteroidetes.c_Bacteroidia.o_Bacteroidales.f_Bacteroidaceae.g_Bacteroides                                               | Beneficial I                | 4.70242304        | 4.08E-77        |
| k_Bacteria.p_Bacteroidetes.c_Bacteroidia.o_Bacteroidales.f_Bacteroidaceae.g_Bacteroides.s_Bacteroides_acidifaciens                    | Beneficial I                | 4.159304822       | 1.37E-52        |
| k_Bacteria.p_Bacteroidetes.c_Bacteroidia.o_Bacteroidales.f_Bacteroidaceae.g_Bacteroides.s_Bacteroides_caccaee                         | Beneficial I                | 3.729009039       | 1.18E-08        |
| k_Bacteria.p_Bacteroidetes.c_Bacteroidia.o_Bacteroidales.f_Bacteroidaceae.g_Bacteroides.s_Bacteroides_dellulosilyticus                | Beneficial I                | 3.444473356       | 9.19E-21        |
| k_Bacteria.p_Bacteroidetes.c_Bacteroidia.o_Bacteroidales.f_Bacteroidaceae.g_Bacteroides.s_Bacteroides_coriolii                        | Beneficial I                | 4.172780832       | 2.61E-26        |
| k_Bacteria.p_Bacteroidetes.c_Bacteroidia.o_Bacteroidales.f_Bacteroidaceae.g_Bacteroides.s_Bacteroides_fragilis                        | Beneficial I                | 3.89098049        | 3.35E-69        |
| k_Bacteria.p_Bacteroidetes.c_Bacteroidia.o_Bacteroidales.f_Bacteroidaceae.g_Bacteroides.s_Bacteroides_thetaiotaomicron                | Beneficial I                | 3.75555452        | 5.81E-12        |
| k_Bacteria.p_Bacteroidetes.c_Bacteroidia.o_Bacteroidales.f_Porphyrromonadaceae                                                        | Beneficial I                | 3.92601832        | 3.30E-27        |
| k_Bacteria.p_Bacteroidetes.c_Bacteroidia.o_Bacteroidales.f_Porphyrromonadaceae.g_Dysgonomonas                                         | Beneficial I                | 3.273404782       | 0.00250048      |
| k_Bacteria.p_Bacteroidetes.c_Bacteroidia.o_Bacteroidales.f_Porphyrromonadaceae.g_Dysgonomonas.s_Dysgonomonas_capnocytophagoides       | Beneficial I                | 3.095098402       | 0.00324438      |
| k_Bacteria.p_Bacteroidetes.c_Bacteroidia.o_Bacteroidales.f_Porphyrromonadaceae.g_Parabacteroides                                      | Beneficial I                | 3.812451692       | 4.35E-27        |
| k_Bacteria.p_Bacteroidetes.c_Bacteroidia.o_Bacteroidales.f_Rikenellaceae.g_Alistipes.s_Alistipes_finegoldii                           | Beneficial I                | 3.142527774       | 1.45E-28        |
| k_Bacteria.p_Bacteroidetes.c_Bacteroidia.o_Bacteroidales.f_Rikenellaceae.g_Alistipes.s_Alistipes_anderdonkii                          | Beneficial I                | 3.53230735        | 3.59E-24        |
| k_Bacteria.p_Firmicutes.c_Bacilli                                                                                                     | Beneficial I                | 3.936260536       | 1.66E-128       |
| k_Bacteria.p_Firmicutes.c_Bacilli.o_Bacillales                                                                                        | Beneficial I                | 3.600549386       | 2.92E-101       |
| k_Bacteria.p_Firmicutes.c_Bacilli.o_Bacillales.f_Bacillaceae                                                                          | Beneficial I                | 3.184482887       | 7.92E-11        |
| k_Bacteria.p_Firmicutes.c_Bacilli.o_Lactobacillales                                                                                   | Beneficial I                | 3.659730468       | 2.31E-79        |
| k_Bacteria.p_Firmicutes.c_Bacilli.o_Lactobacillales.f_Lactobacillaceae                                                                | Beneficial I                | 3.048689172       | 0.00031837      |
| k_Bacteria.p_Firmicutes.c_Bacilli.o_Lactobacillales.f_Streptococcaceae                                                                | Beneficial I                | 3.274214595       | 1.13E-56        |
| k_Bacteria.p_Firmicutes.c_Bacilli.o_Lactobacillales.f_Streptococcaceae.g_Streptococcus                                                | Beneficial I                | 3.191879415       | 5.09E-53        |
| k_Bacteria.p_Firmicutes.c_Bacilli.o_Lactobacillales.f_Streptococcaceae.g_Streptococcus.s_Streptococcus_salivarius                     | Beneficial I                | 3.016356545       | 2.35E-40        |
| k_Bacteria.p_Firmicutes.c_Clostridia.o_Clostridiales.f_Clostridiaceae                                                                 | Beneficial I                | 3.390281462       | 2.50E-26        |
| k_Bacteria.p_Firmicutes.c_Clostridia.o_Clostridiales.f_Clostridiaceae.g_Hungatella                                                    | Beneficial I                | 3.225546866       | 2.00E-52        |
| k_Bacteria.p_Firmicutes.c_Clostridia.o_Clostridiales.f_Clostridiaceae.g_Hungatella.s_Clostridium_hathewayi                            | Beneficial I                | 3.225546866       | 2.00E-52        |
| k_Bacteria.p_Firmicutes.c_Clostridia.o_Clostridiales.f_Eubacteriaceae.g_Eubacterium.s_Eubacterium_coprostanoligenes                   | Beneficial I                | 3.748185827       | 1.43E-14        |
| k_Bacteria.p_Firmicutes.c_Clostridia.o_Clostridiales.f_Flavonifractor                                                                 | Beneficial I                | 3.3827463         | 0               |
| k_Bacteria.p_Firmicutes.c_Clostridia.o_Clostridiales.f_Flavonifractor.g_Flavonifractor                                                | Beneficial I                | 3.3827463         | 0               |
| k_Bacteria.p_Firmicutes.c_Clostridia.o_Clostridiales.f_Flavonifractor.g_Flavonifractor.s_Flavonifractor_plautii                       | Beneficial I                | 3.3827463         | 0               |
| k_Bacteria.p_Firmicutes.c_Clostridia.o_Clostridiales.f_Lachnospiraceae                                                                | Beneficial I                | 4.41557092        | 1.19E-84        |
| k_Bacteria.p_Firmicutes.c_Clostridia.o_Clostridiales.f_Lachnospiraceae.g_Anaerostipes                                                 | Beneficial I                | 3.419739044       | 3.42E-91        |
| k_Bacteria.p_Firmicutes.c_Clostridia.o_Clostridiales.f_Lachnospiraceae.g_Anaerostipes.s_Anaerostipes_caccaee                          | Beneficial I                | 3.419739044       | 3.42E-91        |
| k_Bacteria.p_Firmicutes.c_Clostridia.o_Clostridiales.f_Lachnospiraceae.g_Blautia                                                      | Beneficial I                | 4.193999479       | 9.72E-135       |
| k_Bacteria.p_Firmicutes.c_Clostridia.o_Clostridiales.f_Lachnospiraceae.g_Blautia.faecis                                               | Beneficial I                | 3.173490081       | 5.57E-23        |
| k_Bacteria.p_Firmicutes.c_Clostridia.o_Clostridiales.f_Lachnospiraceae.g_Blautia.s_Blautia_wexlerae                                   | Beneficial I                | 3.70130596        | 1.14E-29        |
| k_Bacteria.p_Firmicutes.c_Clostridia.o_Clostridiales.f_Lachnospiraceae.g_Blautia.s_Ruminococcus_gnavus                                | Beneficial I                | 3.470677739       | 7.34E-43        |
| k_Bacteria.p_Firmicutes.c_Clostridia.o_Clostridiales.f_Lachnospiraceae.g_Blautia.s_Ruminococcus_torques                               | Beneficial I                | 3.59456387        | 3.96E-139       |
| k_Bacteria.p_Firmicutes.c_Clostridia.o_Clostridiales.f_Lachnospiraceae.g_Eisenbergiella                                               | Beneficial I                | 3.055902552       | 2.71E-14        |
| k_Bacteria.p_Firmicutes.c_Clostridia.o_Clostridiales.f_Lachnospiraceae.g_Eisenbergiella.s_Eisenbergiella_tayi                         | Beneficial I                | 3.055902552       | 2.71E-14        |
| k_Bacteria.p_Firmicutes.c_Clostridia.o_Clostridiales.f_Lachnospiraceae.g_Lachnospiraceae                                              | Beneficial I                | 3.42241278        | 6.63E-214       |
| k_Bacteria.p_Firmicutes.c_Clostridia.o_Clostridiales.f_Lachnospiraceae.g_Lachnospiraceae.s_Clostridium_boleae                         | Beneficial I                | 3.357974994       | 1628523404e-311 |
| k_Bacteria.p_Firmicutes.c_Clostridia.o_Clostridiales.f_Peptostreptococcaceae                                                          | Beneficial I                | 3.058639056       | 6.80E-30        |
| k_Bacteria.p_Firmicutes.c_Clostridia.o_Clostridiales.f_Ruminococcaceae.g_Ruminococcus_leptum                                          | Beneficial I                | 3.488811176       | 4.94E-44        |
| k_Bacteria.p_Firmicutes.c_Clostridia.o_Clostridiales.f_Ruminococcaceae.g_Subdoligranulum                                              | Beneficial I                | 3.392874087       | 2.99E-158       |
| k_Bacteria.p_Firmicutes.c_Clostridia.o_Clostridiales.f_Ruminococcaceae.g_Subdoligranulum_variabile                                    | Beneficial I                | 3.392874087       | 2.99E-158       |
| k_Bacteria.p_Firmicutes.c_Erysipelotrichia                                                                                            | Beneficial I                | 3.759608225       | 1.45E-104       |
| k_Bacteria.p_Firmicutes.c_Erysipelotrichia.o_Erysipelotrichales                                                                       | Beneficial I                | 3.759608225       | 1.45E-104       |
| k_Bacteria.p_Firmicutes.c_Erysipelotrichia.o_Erysipelotrichales.f_Erysipelotrichaceae                                                 | Beneficial I                | 3.759608225       | 1.45E-104       |
| k_Bacteria.p_Firmicutes.c_Erysipelotrichia.o_Erysipelotrichales.f_Erysipelotrichaceae.g_Erysipelatoclostridium                        | Beneficial I                | 3.508658417       | 0               |
| k_Bacteria.p_Firmicutes.c_Erysipelotrichia.o_Erysipelotrichales.f_Erysipelotrichaceae.g_Erysipelatoclostridium.s_Clostridium_innocuum | Beneficial I                | 3.083136193       | 2.85E-173       |
| k_Bacteria.p_Firmicutes.c_Negativicutes.o_Selenomonadales.f_Veillonellaceae.g_Dialister.s_Dialister_invisus                           | Beneficial I                | 3.321573457       | 5.68E-21        |
| k_Bacteria.p_Firmicutes.c_Negativicutes.o_Selenomonadales.f_Veillonellaceae.g_Veillonella                                             | Beneficial I                | 3.034274048       | 1.59E-09        |
| k_Bacteria.p_Proteobacteria                                                                                                           | Beneficial I                | 3.276964498       | 1.02E-18        |
| k_Bacteria.p_Verrucomicrobia                                                                                                          | Beneficial I                | 4.028224626       | 1.54E-18        |
| k_Bacteria.p_Verrucomicrobia.c_Verrucomicrobiae                                                                                       | Beneficial I                | 4.028224626       | 1.54E-18        |
| k_Bacteria.p_Verrucomicrobia.c_Verrucomicrobiae.o_Verrucomicrobiales                                                                  | Beneficial I                | 4.028224626       | 1.54E-18        |
| k_Bacteria.p_Verrucomicrobia.c_Verrucomicrobiae.o_Verrucomicrobiales.f_Akkermansiaceae                                                | Beneficial I                | 4.027924965       | 2.13E-18        |
| k_Bacteria.p_Verrucomicrobia.c_Verrucomicrobiae.o_Verrucomicrobiales.f_Akkermansiaceae.g_Akkermansia                                  | Beneficial I                | 4.027924965       | 2.13E-18        |
| k_Bacteria.p_Verrucomicrobia.c_Verrucomicrobiae.o_Verrucomicrobiales.f_Akkermansiaceae.g_Akkermansia_muciniphila                      | Beneficial I                | 4.027924965       | 2.13E-18        |
|                                                                                                                                       |                             |                   |                 |
| k_Bacteria.p_Bacteroidetes.c_Bacteroidia.o_Bacteroidales.f_Bacteroidaceae.g_Bacteroides.s_Bacteroides_eggerthii                       | Beneficial II               | 3.85217923        | 1.83E-54        |
| k_Bacteria.p_Firmicutes                                                                                                               | Beneficial II               | 4.594075446       | 2.06E-26        |
| k_Bacteria.p_Firmicutes.c_Clostridia                                                                                                  | Beneficial II               | 4.651187611       | 2.53E-34        |
| k_Bacteria.p_Firmicutes.c_Clostridia.o_Clostridiales                                                                                  | Beneficial II               | 4.651130026       | 2.51E-34        |
| k_Bacteria.p_Firmicutes.c_Clostridia.o_Clostridiales.f_Eubacteriaceae                                                                 | Beneficial II               | 3.613304876       | 1.66E-17        |
| k_Bacteria.p_Firmicutes.c_Clostridia.o_Clostridiales.f_Eubacteriaceae.g_Eubacterium                                                   | Beneficial II               | 3.613304876       | 1.66E-17        |
| k_Bacteria.p_Firmicutes.c_Clostridia.o_Clostridiales.f_Eubacteriaceae.g_Eubacterium.s_Eubacterium_eligens                             | Beneficial II               | 3.789677137       | 1.16E-21        |
| k_Bacteria.p_Firmicutes.c_Clostridia.o_Clostridiales.f_Lachnospiraceae.g_Coproccoccus                                                 | Beneficial II               | 3.704215745       | 1.09E-132       |
| k_Bacteria.p_Firmicutes.c_Clostridia.o_Clostridiales.f_Lachnospiraceae.g_Coproccoccus.s_Coproccoccus_eutactus                         | Beneficial II               | 3.708042675       | 3.16E-177       |
| k_Bacteria.p_Firmicutes.c_Clostridia.o_Clostridiales.f_Lachnospiraceae.g_Roseburia                                                    | Beneficial II               | 3.80135345        | 6.00E-39        |
| k_Bacteria.p_Firmicutes.c_Clostridia.o_Clostridiales.f_Lachnospiraceae.g_Roseburia.s_Roseburia_intestinalis                           | Beneficial II               | 3.797825264       | 7.46E-49        |
| k_Bacteria.p_Firmicutes.c_Clostridia.o_Clostridiales.f_Ruminococcaceae                                                                | Beneficial II               | 4.505907877       | 1.73E-80        |
| k_Bacteria.p_Firmicutes.c_Clostridia.o_Clostridiales.f_Ruminococcaceae.g_Faecalibacterium                                             | Beneficial II               | 4.243499214       | 2.09E-98        |
| k_Bacteria.p_Firmicutes.c_Clostridia.o_Clostridiales.f_Ruminococcaceae.g_Faecalibacterium.s_Faecalibacterium_prausnitzii              | Beneficial II               | 4.243499214       | 2.09E-98        |
| k_Bacteria.p_Firmicutes.c_Clostridia.o_Clostridiales.f_Ruminococcaceae.g_Ruminococcus                                                 | Beneficial II               | 3.663369746       | 4.23E-101       |
| k_Bacteria.p_Firmicutes.c_Clostridia.o_Clostridiales.f_Ruminococcaceae.g_Ruminococcus_bromii                                          | Beneficial II               | 3.515374817       | 2.34E-52        |
|                                                                                                                                       |                             |                   |                 |
| k_Bacteria.p_Bacteroidetes                                                                                                            | Detrimental I               | 4.570155149       | 7.96E-20        |
| k_Bacteria.p_Bacteroidetes.c_Bacteroidia                                                                                              | Detrimental I               | 4.579688261       | 1.08E-20        |
| k_Bacteria.p_Bacteroidetes.c_Bacteroidia.o_Bacteroidales                                                                              | Detrimental I               | 4.579688261       | 1.08E-20        |
| k_Bacteria.p_Bacteroidetes.c_Bacteroidia.o_Bacteroidales.f_Bacteroidaceae.g_Bacteroides.s_Bacteroides_coprocola                       | Detrimental I               | 3.410770739       | 4.05E-45        |
| k_Bacteria.p_Bacteroidetes.c_Bacteroidia.o_Bacteroidales.f_Bacteroidaceae.g_Bacteroides.s_Bacteroides_coprophilus                     | Detrimental I               | 3.409526889       | 2.01E-46        |
| k_Bacteria.p_Bacteroidetes.c_Bacteroidia.o_Bacteroidales.f_Bacteroidaceae.g_Bacteroides.s_Bacteroides_plebeius                        | Detrimental I               | 4.15454528        | 1.26E-165       |
| k_Bacteria.p_Bacteroidetes.c_Bacteroidia.o_Bacteroidales.f_Prevotellaceae                                                             | Detrimental I               | 4.873942135       | 2.91E-298       |
| k_Bacteria.p_Bacteroidetes.c_Bacteroidia.o_Bacteroidales.f_Prevotellaceae.g_Paraprevotella                                            | Detrimental I               | 3.429306761       | 1.68E-98        |

|                                                                                                                                     |                |             |           |
|-------------------------------------------------------------------------------------------------------------------------------------|----------------|-------------|-----------|
| k__Bacteria.p__Bacteroidetes.c__Bacteroidia.o__Bacteroidales.f__Prevotellaceae.g__Paraprevotella.s__Paraprevotella_clara            | Detrimental I  | 3.395656211 | 4.63E-88  |
| k__Bacteria.p__Bacteroidetes.c__Bacteroidia.o__Bacteroidales.f__Prevotellaceae.g__Prevotella                                        | Detrimental I  | 4.858163337 | 3.10E-259 |
| k__Bacteria.p__Bacteroidetes.c__Bacteroidia.o__Bacteroidales.f__Prevotellaceae.g__Prevotella.s__Prevotella_copri                    | Detrimental I  | 4.804878001 | 2.23E-265 |
| k__Bacteria.p__Bacteroidetes.c__Bacteroidia.o__Bacteroidales.f__Prevotellaceae.g__Prevotella.s__Prevotella_stercorea                | Detrimental I  | 3.046336967 | 2.61E-06  |
| k__Bacteria.p__Firmicutes.c__Clostridia.o__Clostridiales.f__Lachnospiraceae.g__Butyrivibrio                                         | Detrimental I  | 3.231967398 | 2.83E-77  |
| k__Bacteria.p__Firmicutes.c__Clostridia.o__Clostridiales.f__Lachnospiraceae.g__Butyrivibrio.s__Butyrivibrio_crossotus               | Detrimental I  | 3.229243637 | 2.61E-72  |
| k__Bacteria.p__Firmicutes.c__Clostridia.o__Clostridiales.f__Lachnospiraceae.g__Roseburia.s__Roseburia_inulinivorans                 | Detrimental I  | 3.793236902 | 3.47E-35  |
| k__Bacteria.p__Firmicutes.c__Negativicutes.o__Selenomonadales.f__Veillonellaceae                                                    | Detrimental I  | 3.608581791 | 2.90E-32  |
| k__Bacteria.p__Bacteroidetes.c__Bacteroidia.o__Bacteroidales.f__Bacteroidaceae.g__Bacteroides.s__Bacteroides_intestinalis           | Detrimental II | 3.184865466 | 4.37E-19  |
| k__Bacteria.p__Bacteroidetes.c__Bacteroidia.o__Bacteroidales.f__Bacteroidaceae.g__Bacteroides.s__Bacteroides_massiliensis           | Detrimental II | 4.006943092 | 4.97E-43  |
| k__Bacteria.p__Bacteroidetes.c__Bacteroidia.o__Bacteroidales.f__Bacteroidaceae.g__Bacteroides.s__Bacteroides_stercoris              | Detrimental II | 3.860989438 | 1.28E-57  |
| k__Bacteria.p__Bacteroidetes.c__Bacteroidia.o__Bacteroidales.f__Bacteroidaceae.g__Bacteroides.s__Bacteroides_uniformis              | Detrimental II | 3.987259424 | 4.54E-60  |
| k__Bacteria.p__Bacteroidetes.c__Bacteroidia.o__Bacteroidales.f__Porphyromonadaceae.g__Barnesiella                                   | Detrimental II | 3.078344295 | 3.92E-62  |
| k__Bacteria.p__Bacteroidetes.c__Bacteroidia.o__Bacteroidales.f__Porphyromonadaceae.g__Parabacteroides.s__Parabacteroides_goldsteini | Detrimental II | 3.30898263  | 8.92E-22  |
| k__Bacteria.p__Bacteroidetes.c__Bacteroidia.o__Bacteroidales.f__Rikenellaceae                                                       | Detrimental II | 3.912723817 | 9.98E-49  |
| k__Bacteria.p__Bacteroidetes.c__Bacteroidia.o__Bacteroidales.f__Rikenellaceae.g__Alistipes                                          | Detrimental II | 3.912723817 | 9.98E-49  |
| k__Bacteria.p__Bacteroidetes.c__Bacteroidia.o__Bacteroidales.f__Rikenellaceae.g__Alistipes.s__Alistipes_putredinis                  | Detrimental II | 3.327553199 | 1.92E-62  |
| k__Bacteria.p__Firmicutes.c__Clostridia.o__Clostridiales.f__Ruminococcaceae.g__Ruminiclostridium                                    | Detrimental II | 3.628399675 | 1.42E-48  |
| k__Bacteria.p__Firmicutes.c__Clostridia.o__Clostridiales.f__Ruminococcaceae.g__Ruminiclostridium.s__Eubacterium_siraeum_V10Sc8a     | Detrimental II | 3.665277663 | 6.88E-107 |

LDA scores and p-values were calculated using the LEFse package.

**Abbreviation:**

LDA = Linear discrimination analysis

**Supplementary Table 10.** Continuous variable Cox regression models for Pittsburgh (full cohort) and Houston.

| LKT                                  | PITTSBURGH |                       |          |            | HOUSTON |                     |         |   | Same HR dir |
|--------------------------------------|------------|-----------------------|----------|------------|---------|---------------------|---------|---|-------------|
|                                      | beta       | HR (95% CI for HR)    | p.value  | Storey FDR | beta    | HR (95% CI for HR)  | p.value |   |             |
| LKT_s_Lactobacillus_paragasseri      | -0.00909   | 0.99095 (0.894-1.1)   | 0.86     | 0.56       | 1.25    | 3.4759 (0.955-12.7) | 0.06    | 0 |             |
| LKT_s_Megasphaera_Unclassified       | -0.208     | 0.81256 (0.664-0.995) | 0.04     | 0.21       | 1.23    | 3.4179 (1.22-9.57)  | 0.02    | 0 |             |
| LKT_s_Lactobacillus_plantarum        | 0.0149     | 1.015 (0.916-1.13)    | 0.78     | 0.54       | 0.729   | 2.0725 (1.2-3.59)   | 0.01    | 1 |             |
| LKT_s_Lactobacillus_salivarius       | 0.065      | 1.0672 (0.973-1.17)   | 0.17     | 0.29       | 0.488   | 1.6294 (1.05-2.53)  | 0.03    | 1 |             |
| LKT_s_Enterobacter_roggenkampii      | -0.0329    | 0.96761 (0.844-1.11)  | 0.64     | 0.49       | 0.412   | 1.5103 (1.02-2.23)  | 0.04    | 0 |             |
| LKT_s_Actinomyces_oris               | -0.114     | 0.89262 (0.793-1)     | 0.06     | 0.21       | 0.303   | 1.3535 (0.808-2.27) | 0.25    | 0 |             |
| LKT_s_Bacteroides_plebeius           | 0.0992     | 1.1043 (0.988-1.23)   | 0.08     | 0.23       | 0.293   | 1.3407 (1.06-1.7)   | 0.01    | 1 |             |
| LKT_s_Enterocloster_clostridioformis | -0.169     | 0.84424 (0.699-1.02)  | 0.08     | 0.23       | 0.256   | 1.2921 (0.977-1.71) | 0.07    | 0 |             |
| LKT_s_Desulfovibrio_piger            | 0.0172     | 1.0174 (0.932-1.11)   | 0.70     | 0.51       | 0.214   | 1.2392 (0.933-1.65) | 0.14    | 1 |             |
| LKT_g_Escherichia                    | 0.0202     | 1.0204 (0.899-1.16)   | 0.75     | 0.53       | 0.187   | 1.2062 (0.964-1.51) | 0.10    | 1 |             |
| LKT_g_Megasphaera                    | -0.0743    | 0.92837 (0.824-1.05)  | 0.22     | 0.32       | 0.183   | 1.2005 (0.896-1.61) | 0.22    | 0 |             |
| LKT_s_Sutterella_parvirubra          | 0.0474     | 1.0485 (0.911-1.21)   | 0.51     | 0.47       | 0.178   | 1.1946 (1-1.43)     | 0.05    | 1 |             |
| LKT_s_Eubacterium_maltosivorans      | 0.033      | 1.0335 (0.924-1.16)   | 0.57     | 0.48       | 0.178   | 1.1951 (0.909-1.57) | 0.20    | 1 |             |
| LKT_s_Enterocloster_lavalensis       | -0.0737    | 0.92899 (0.806-1.07)  | 0.31     | 0.37       | 0.175   | 1.1911 (0.91-1.56)  | 0.20    | 0 |             |
| LKT_s_Desulfovibrio_fairfieldensis   | 0.033      | 1.0336 (0.944-1.13)   | 0.47     | 0.45       | 0.172   | 1.1874 (1.02-1.38)  | 0.03    | 1 |             |
| LKT_s_Bifidobacterium_dentium        | -0.0104    | 0.98961 (0.9-1.09)    | 0.83     | 0.55       | 0.171   | 1.1864 (0.776-1.81) | 0.43    | 0 |             |
| LKT_f_Enterobacteriaceae             | 0.0244     | 1.0247 (0.911-1.18)   | 0.73     | 0.52       | 0.17    | 1.1852 (0.941-1.49) | 0.15    | 1 |             |
| LKT_s_Sutterella_faecalis            | 0.113      | 1.1199 (1.01-1.24)    | 0.04     | 0.21       | 0.166   | 1.1812 (0.962-1.45) | 0.11    | 1 |             |
| LKT_s_Prevotella_buccae              | 0.12       | 1.1274 (1.05-1.21)    | 1.50E-03 | 0.04       | 0.164   | 1.1781 (0.988-1.41) | 0.07    | 1 |             |
| LKT_s_Prevotella_oryzae              | 0.199      | 1.2204 (1.11-1.34)    | 5.50E-05 | 0.01       | 0.16    | 1.1731 (0.993-1.39) | 0.06    | 1 |             |
| LKT_s_Bacteroides_massiliensis       | 0.0811     | 1.0845 (1-1.17)       | 0.04     | 0.21       | 0.159   | 1.1719 (0.988-1.39) | 0.07    | 1 |             |
| LKT_s_Enterocloster_boiteae          | -0.127     | 0.88085 (0.717-1.08)  | 0.23     | 0.32       | 0.157   | 1.1695 (0.842-1.63) | 0.35    | 0 |             |
| LKT_s_Prevotella_stercora            | 0.123      | 1.1304 (1.05-1.21)    | 8.11E-04 | 0.03       | 0.15    | 1.1617 (1.01-1.34)  | 0.04    | 1 |             |
| LKT_s_Duodenibacillus_massiliensis   | 0.0288     | 1.0292 (0.926-1.14)   | 0.59     | 0.48       | 0.149   | 1.1605 (0.975-1.38) | 0.09    | 1 |             |
| LKT_s_Lactobacillus_gasseri          | 0.0499     | 1.0512 (0.969-1.14)   | 0.23     | 0.32       | 0.148   | 1.1592 (0.886-1.52) | 0.28    | 1 |             |
| LKT_s_Sutterella_megalosphaeroides   | 0.0747     | 1.0776 (0.959-1.21)   | 0.21     | 0.32       | 0.146   | 1.1577 (0.971-1.38) | 0.10    | 1 |             |
| LKT_s_Prevotella_lascloaii           | 0.131      | 1.1401 (1.06-1.22)    | 2.73E-04 | 0.01       | 0.144   | 1.1545 (1-1.33)     | 0.04    | 1 |             |
| LKT_g_Prevotella                     | 0.188      | 1.2063 (1.09-1.33)    | 1.62E-04 | 0.01       | 0.143   | 1.1538 (0.981-1.36) | 0.08    | 1 |             |
| LKT_s_Acidaminococcus_intestini      | 0.0214     | 1.0216 (0.949-1.1)    | 0.57     | 0.48       | 0.143   | 1.154 (0.968-1.38)  | 0.11    | 1 |             |
| LKT_p_Proteobacteria                 | 0.099      | 1.1041 (0.927-1.31)   | 0.27     | 0.35       | 0.142   | 1.1528 (0.814-1.63) | 0.42    | 1 |             |
| LKT_g_Roseburia                      | 0.0472     | 1.0484 (0.885-1.24)   | 0.59     | 0.48       | 0.14    | 1.1507 (0.808-1.64) | 0.44    | 1 |             |
| LKT_s_Eisenbergiella_tayi            | -0.0703    | 0.93209 (0.817-1.06)  | 0.30     | 0.37       | 0.136   | 1.1452 (0.844-1.55) | 0.38    | 0 |             |
| LKT_s_Prevotella_Unclassified        | 0.125      | 1.1333 (1.05-1.22)    | 8.51E-04 | 0.03       | 0.134   | 1.1437 (1.01-1.3)   | 0.04    | 1 |             |
| LKT_s_Bacteroides_Unclassified       | -0.000593  | 0.99941 (0.865-1.16)  | 0.99     | 0.60       | 0.134   | 1.1436 (0.789-1.66) | 0.48    | 0 |             |
| LKT_s_Candidatus_Stoquefichus        | -0.0279    | 0.97248 (0.861-1.1)   | 0.65     | 0.49       | 0.13    | 1.1384 (0.802-1.62) | 0.47    | 0 |             |
| LKT_s_Streptococcus_parasanguinis    | -0.00183   | 0.99817 (0.906-1.1)   | 0.97     | 0.59       | 0.129   | 1.1377 (0.877-1.48) | 0.33    | 0 |             |
| LKT_s_Asaccharobacter_celatus        | -0.0399    | 0.96093 (0.877-1.05)  | 0.39     | 0.41       | 0.128   | 1.137 (0.879-1.47)  | 0.33    | 0 |             |
| LKT_s_Prevotella_koreensis           | 0.202      | 1.2236 (1.1-1.36)     | 2.89E-04 | 0.01       | 0.117   | 1.1247 (0.917-1.38) | 0.26    | 1 |             |
| LKT_s_Desulfovibrio_Unclassified     | 0.0725     | 1.0752 (0.985-1.17)   | 0.11     | 0.25       | 0.117   | 1.1239 (0.996-1.27) | 0.06    | 1 |             |
| LKT_s_Akkermansia_Unclassified       | 0.00208    | 1.0021 (0.912-1.1)    | 0.97     | 0.59       | 0.117   | 1.1239 (0.937-1.35) | 0.21    | 1 |             |
| LKT_s_Tyzzerella_nexilis             | -0.117     | 0.88979 (0.787-1.01)  | 0.06     | 0.22       | 0.114   | 1.121 (0.898-1.4)   | 0.31    | 0 |             |
| LKT_s_Paraprevotella_clara           | 0.0289     | 1.0293 (0.952-1.11)   | 0.47     | 0.45       | 0.113   | 1.1194 (0.98-1.28)  | 0.10    | 1 |             |
| LKT_s_Streptococcus_vestibularis     | 0.032      | 1.0325 (0.943-1.13)   | 0.49     | 0.46       | 0.113   | 1.1201 (0.827-1.52) | 0.46    | 1 |             |
| LKT_s_Prevotella_copri               | 0.102      | 1.107 (1.04-1.18)     | 1.49E-03 | 0.04       | 0.104   | 1.1091 (1.01-1.21)  | 0.02    | 1 |             |
| LKT_s_Raoultibacter_timonensis       | -0.0111    | 0.98892 (0.911-1.07)  | 0.79     | 0.54       | 0.103   | 1.1083 (0.835-1.47) | 0.48    | 1 |             |
| LKT_s_Enterocloster_asparagiformis   | -0.0437    | 0.95726 (0.821-1.12)  | 0.58     | 0.48       | 0.101   | 1.1066 (0.81-1.51)  | 0.53    | 0 |             |
| LKT_g_Klebsiella                     | 0.0149     | 1.015 (0.919-1.12)    | 0.77     | 0.53       | 0.0999  | 1.1051 (0.92-1.33)  | 0.29    | 1 |             |
| LKT_s_Collinsella_bouchesdurhonenis  | -0.0568    | 0.94481 (0.848-1.05)  | 0.31     | 0.37       | 0.098   | 1.1029 (0.832-1.46) | 0.50    | 0 |             |
| LKT_s_Cuneatibacter_caecimuris       | 0.194      | 1.2144 (1.03-1.44)    | 0.02     | 0.21       | 0.097   | 1.1018 (0.818-1.48) | 0.52    | 1 |             |
| LKT_g_Coproccoccus                   | -0.135     | 0.87358 (0.74-1.03)   | 0.11     | 0.25       | 0.0951  | 1.0998 (0.762-1.59) | 0.61    | 0 |             |
| LKT_f_Eggerthellaceae                | -0.0607    | 0.94115 (0.802-1.11)  | 0.46     | 0.45       | 0.095   | 1.0997 (0.799-1.51) | 0.56    | 0 |             |
| LKT_s_Desulfovibrio_desulfuricans    | 0.0721     | 1.0748 (0.988-1.17)   | 0.10     | 0.23       | 0.0945  | 1.0991 (0.91-1.33)  | 0.33    | 1 |             |
| LKT_s_Paraprevotella_xylaniphila     | 0.0323     | 1.0328 (0.936-1.14)   | 0.52     | 0.47       | 0.0931  | 1.0976 (0.937-1.29) | 0.25    | 1 |             |
| LKT_s_Enterocloster_aldensis         | -0.0676    | 0.93461 (0.796-1.1)   | 0.41     | 0.42       | 0.0914  | 1.0957 (0.879-1.37) | 0.42    | 0 |             |
| LKT_g_Streptococcus                  | -0.0152    | 0.98496 (0.857-1.13)  | 0.83     | 0.55       | 0.0906  | 1.0949 (0.808-1.48) | 0.56    | 0 |             |
| LKT_s_Escherichia_coli               | 0.00358    | 1.0036 (0.932-1.08)   | 0.93     | 0.58       | 0.0901  | 1.0942 (0.966-1.24) | 0.16    | 1 |             |
| LKT_s_Enterocloster_caecimuris       | -0.112     | 0.89402 (0.787-1.02)  | 0.08     | 0.23       | 0.0868  | 1.0907 (0.507-2.35) | 0.82    | 0 |             |
| LKT_s_Bacteroides_stercoris          | 0.0327     | 1.0332 (0.942-1.13)   | 0.49     | 0.46       | 0.0853  | 1.0891 (0.885-1.34) | 0.42    | 1 |             |
| LKT_s_Adlercreutzia_Unclassified     | -0.0375    | 0.9632 (0.888-1.04)   | 0.37     | 0.40       | 0.0852  | 1.0889 (0.841-1.41) | 0.52    | 0 |             |
| LKT_g_Akkermansia                    | -0.0224    | 0.97789 (0.882-1.08)  | 0.67     | 0.49       | 0.0834  | 1.087 (0.923-1.28)  | 0.32    | 0 |             |
| LKT_g_Subdoligranulum                | 0.00922    | 1.0093 (0.863-1.18)   | 0.91     | 0.57       | 0.0797  | 1.0829 (0.752-1.56) | 0.67    | 1 |             |
| LKT_s_Eggerthella_lenta              | -0.0948    | 0.90953 (0.826-1)     | 0.05     | 0.21       | 0.0741  | 1.0769 (0.76-1.53)  | 0.68    | 0 |             |
| LKT_f_Akkermansiaceae                | -0.0659    | 0.93623 (0.829-1.06)  | 0.29     | 0.37       | 0.0733  | 1.076 (0.914-1.27)  | 0.38    | 0 |             |
| LKT_s_Absiella_dolichum              | -0.28      | 0.75543 (0.633-0.902) | 1.94E-03 | 0.04       | 0.0697  | 1.0722 (0.779-1.48) | 0.67    | 0 |             |
| LKT_s_Bacteroides_thetaiotaomicron   | 0.0874     | 1.0913 (0.968-1.23)   | 0.15     | 0.29       | 0.0672  | 1.0696 (0.819-1.4)  | 0.62    | 1 |             |
| LKT_s_Clostridium_symbiosum          | -0.103     | 0.90234 (0.755-1.08)  | 0.26     | 0.34       | 0.0666  | 1.0688 (0.841-1.36) | 0.59    | 0 |             |
| LKT_s_Streptococcus_mutans           | 0.0456     | 1.0467 (0.953-1.15)   | 0.34     | 0.39       | 0.0646  | 1.0667 (0.695-1.64) | 0.77    | 1 |             |
| LKT_s_Butyricimonas_virosa           | 0.0621     | 1.0641 (0.976-1.16)   | 0.16     | 0.29       | 0.0645  | 1.0666 (0.911-1.25) | 0.42    | 1 |             |
| LKT_s_Dialister_invisus              | 0.016      | 1.0161 (0.946-1.09)   | 0.66     | 0.49       | 0.064   | 1.0661 (0.949-1.2)  | 0.28    | 1 |             |
| LKT_g_Acidaminococcus                | 0.0613     | 1.0633 (0.98-1.15)    | 0.14     | 0.28       | 0.0637  | 1.0658 (0.941-1.21) | 0.32    | 1 |             |
| LKT_s_Adlercreutzia_aequifaciens     | -0.0569    | 0.94466 (0.873-1.02)  | 0.16     | 0.29       | 0.0629  | 1.0649 (0.844-1.34) | 0.60    | 0 |             |
| LKT_s_Acidaminococcus_Unclassified   | 0.0528     | 1.0542 (0.975-1.14)   | 0.18     | 0.31       | 0.061   | 1.0629 (0.914-1.24) | 0.43    | 1 |             |
| LKT_s_Akkermansia_muciniphila        | 0.0628     | 1.0648 (0.988-1.15)   | 0.10     | 0.24       | 0.0593  | 1.0611 (0.934-1.21) | 0.36    | 1 |             |
| LKT_s_Butyricimonas_faehominis       | 0.0202     | 1.0205 (0.935-1.11)   | 0.65     | 0.49       | 0.0552  | 1.0567 (0.883-1.26) | 0.55    | 1 |             |
| LKT_s_Collinsella_intestinalis       | -0.113     | 0.89343 (0.799-0.999) | 0.05     | 0.21       | 0.0539  | 1.0553 (0.866-1.29) | 0.59    | 0 |             |
| LKT_g_Eggerthella                    | -0.0895    | 0.91442 (0.809-1.03)  | 0.15     | 0.29       | 0.0523  | 1.0537 (0.801-1.39) | 0.71    | 0 |             |
| LKT_s_Bacteroides_coprocola          | 0.0882     | 1.0922 (1.01-1.18)    | 0.03     | 0.21       | 0.0497  | 1.051 (0.888-1.24)  | 0.56    | 1 |             |
| LKT_s_Romboutsia_timonensis          | 0.0273     | 1.0277 (0.944-1.12)   | 0.53     | 0.47       | 0.0465  | 1.0476 (0.852-1.29) | 0.66    | 1 |             |
| LKT_s_Faecalimonas_umblicata         | -0.11      | 0.89558 (0.798-1)     | 0.06     | 0.21       | 0.0463  | 1.0474 (0.755-1.45) | 0.78    | 0 |             |
| LKT_s_Veillonella_parvula            | 0.0742     | 1.077 (0.981-1.18)    | 0.12     | 0.26       | 0.0455  | 1.0466 (0.709-1.54) | 0.82    | 1 |             |
| LKT_g_Oscillibacter                  | 0.0214     | 1.0216 (0.861-1.21)   | 0.81     | 0.55       | 0.0455  | 1.0466 (0.825-1.33) | 0.71    | 0 |             |
| LKT_s_Gordonibacter_pamelaeae        | -0.0422    | 0.95868 (0.876-1.05)  | 0.36     | 0.40       | 0.0389  | 1.0397 (0.813-1.33) | 0.76    | 1 |             |
| LKT_s_Bacteroides_eggerthii          | 0.0112     | 1.0113 (0.923-1.11)   | 0.81     | 0.55       | 0.0375  | 1.0382 (0.894-1.21) | 0.62    | 1 |             |

|                                          |          |                       |          |      |           |                      |      |   |
|------------------------------------------|----------|-----------------------|----------|------|-----------|----------------------|------|---|
| LKT_s_Sellimonas_intestinalis            | -0.0722  | 0.93032 (0.841-1.03)  | 0.16     | 0.29 | 0.035     | 1.0356 (0.78-1.37)   | 0.81 | 0 |
| LKT_s_Actinomyces_bouchesdurhonenis      | -0.122   | 0.88487 (0.768-1.02)  | 0.09     | 0.23 | 0.0339    | 1.0345 (0.58-1.84)   | 0.91 | 0 |
| LKT_s_Sutterella_wadsworthensis          | 0.0434   | 1.0444 (0.963-1.13)   | 0.30     | 0.37 | 0.0334    | 1.034 (0.916-1.17)   | 0.59 | 1 |
| LKT_s_Anaerotruncus_colihominis          | -0.0602  | 0.94159 (0.766-1.16)  | 0.57     | 0.48 | 0.033     | 1.0335 (0.633-1.69)  | 0.90 | 0 |
| LKT_s_Lactobacillus_fermentum            | 0.0236   | 1.0239 (0.942-1.11)   | 0.58     | 0.48 | 0.0316    | 1.0321 (0.833-1.28)  | 0.77 | 1 |
| LKT_g_Enterobacter                       | 0.00121  | 1.0012 (0.911-1.1)    | 0.98     | 0.59 | 0.0306    | 1.0311 (0.701-1.52)  | 0.88 | 1 |
| LKT_s_Catenibacterium_mitsuokai          | -0.148   | 0.86265 (0.734-1.01)  | 0.07     | 0.23 | 0.0305    | 1.0309 (0.819-1.3)   | 0.80 | 0 |
| LKT_s_Hungatella_hathewayi               | 0.0224   | 1.0226 (0.819-1.28)   | 0.84     | 0.56 | 0.0301    | 1.0306 (0.74-1.43)   | 0.86 | 1 |
| LKT_s_Emergencia_timonensis              | 0.00573  | 1.0057 (0.921-1.1)    | 0.90     | 0.57 | 0.0262    | 1.0266 (0.845-1.25)  | 0.79 | 1 |
| LKT_s_Parabacteroides_merdae             | 0.13     | 1.1385 (1.02-1.28)    | 0.03     | 0.21 | 0.0247    | 1.0251 (0.858-1.22)  | 0.78 | 1 |
| LKT_s_Erysipelatoclostridium_ramosum     | -0.105   | 0.89994 (0.809-1)     | 0.05     | 0.21 | 0.0238    | 1.0241 (0.758-1.38)  | 0.88 | 0 |
| LKT_s_Burkholderiales_bacterium          | -0.00671 | 0.99332 (0.911-1.08)  | 0.88     | 0.56 | 0.0214    | 1.0216 (0.89-1.17)   | 0.76 | 0 |
| LKT_g_Veillonella                        | 0.101    | 1.106 (0.978-1.25)    | 0.11     | 0.25 | 0.0175    | 1.0176 (0.738-1.4)   | 0.92 | 1 |
| LKT_s_Dorea_formicigenans                | -0.135   | 0.87345 (0.754-1.01)  | 0.07     | 0.22 | 0.0167    | 1.0168 (0.685-1.51)  | 0.93 | 0 |
| LKT_s_Bilophila_wadsworthia              | 0.0514   | 1.0527 (0.968-1.15)   | 0.23     | 0.32 | 0.0166    | 1.0167 (0.893-1.16)  | 0.80 | 1 |
| LKT_s_CrAssphage_ZA                      | 0.0197   | 1.0199 (0.943-1.1)    | 0.62     | 0.49 | 0.0162    | 1.0164 (0.923-1.12)  | 0.74 | 1 |
| LKT_s_Haemophilus_painfluenzae           | 0.0814   | 1.0848 (0.975-1.21)   | 0.14     | 0.27 | 0.012     | 1.0121 (0.823-1.24)  | 0.91 | 1 |
| LKT_s_Victivallis_vadensis               | 0.088    | 1.092 (0.987-1.21)    | 0.09     | 0.23 | 0.0108    | 1.0109 (0.796-1.28)  | 0.93 | 1 |
| LKT_s_Butyricimonas_paravirosa           | 0.0585   | 1.0603 (0.957-1.17)   | 0.26     | 0.34 | 0.0105    | 1.0106 (0.782-1.31)  | 0.94 | 1 |
| LKT_s_Faecalitalea_cylindroides          | 0.065    | 1.0672 (0.972-1.17)   | 0.17     | 0.30 | 0.00824   | 1.0083 (0.763-1.33)  | 0.95 | 1 |
| LKT_s_Roseburia_inulinivorans            | -0.0421  | 0.95874 (0.84-1.09)   | 0.53     | 0.47 | 0.00774   | 1.0078 (0.789-1.29)  | 0.95 | 0 |
| LKT_s_Oscillibacter_Unclassified         | 0.0981   | 1.1031 (0.971-1.25)   | 0.13     | 0.27 | 0.00726   | 1.0073 (0.782-1.3)   | 0.96 | 1 |
| LKT_s_Ruminococcus_gnavus                | -0.224   | 0.79927 (0.692-0.923) | 2.36E-03 | 0.05 | 0.00665   | 1.0067 (0.611-1.66)  | 0.98 | 0 |
| LKT_s_Anaerobutyrium_halii               | -0.0191  | 0.98106 (0.896-1.07)  | 0.68     | 0.50 | 0.00422   | 1.0042 (0.828-1.22)  | 0.97 | 0 |
| LKT_g_Bacteroides                        | 0.0994   | 1.1045 (0.885-1.38)   | 0.38     | 0.41 | 0.00362   | 1.0036 (0.488-2.06)  | 0.99 | 1 |
| LKT_s_Parasutterella_excrementihominis   | -0.00475 | 0.99526 (0.925-1.07)  | 0.90     | 0.57 | 0.000783  | 1.0008 (0.89-1.13)   | 0.99 | 0 |
| LKT_g_Collinsella                        | -0.00159 | 0.99841 (0.888-1.12)  | 0.98     | 0.59 | 0.000769  | 1.0008 (0.812-1.23)  | 0.99 | 0 |
| LKT_s_Acinetobacter_baumannii            | 0.177    | 1.1931 (1.04-1.36)    | 0.01     | 0.11 | -0.000585 | 0.99942 (0.871-1.15) | 0.99 | 0 |
| LKT_s_Collinsella_Unclassified           | 0.00286  | 1.0029 (0.915-1.1)    | 0.95     | 0.59 | -0.00129  | 0.99871 (0.837-1.19) | 0.99 | 0 |
| LKT_s_Alistipes_dispar                   | 0.0789   | 1.0821 (1-1.17)       | 0.04     | 0.21 | -0.00176  | 0.99824 (0.849-1.17) | 0.98 | 0 |
| LKT_s_Enterobacter_cloacae               | -0.0322  | 0.96834 (0.873-1.07)  | 0.54     | 0.48 | -0.00219  | 0.99782 (0.658-1.51) | 0.99 | 1 |
| LKT_s_Collinsella_stercoris              | -0.103   | 0.90169 (0.807-1.01)  | 0.07     | 0.22 | -0.00414  | 0.99587 (0.775-1.28) | 0.97 | 1 |
| LKT_s_Alistipes_putredinis               | 0.0274   | 1.0278 (0.946-1.12)   | 0.51     | 0.47 | -0.00434  | 0.99567 (0.883-1.12) | 0.94 | 0 |
| LKT_s_Haemophilus_Unclassified           | 0.112    | 1.1187 (0.996-1.26)   | 0.06     | 0.21 | -0.00537  | 0.99464 (0.78-1.27)  | 0.97 | 0 |
| LKT_s_Eggerthella_Unclassified           | -0.0665  | 0.93562 (0.847-1.03)  | 0.19     | 0.31 | -0.00574  | 0.99428 (0.73-1.35)  | 0.97 | 1 |
| LKT_s_Bacteroides_intestinalis           | 0.00716  | 1.0072 (0.92-1.1)     | 0.88     | 0.56 | -0.00703  | 0.99299 (0.837-1.18) | 0.94 | 0 |
| LKT_s_Klebsiella_pneumoniae              | -0.0338  | 0.9668 (0.89-1.05)    | 0.43     | 0.43 | -0.00751  | 0.99252 (0.81-1.22)  | 0.94 | 1 |
| LKT_s_Bilophila_Unclassified             | 0.0253   | 1.0256 (0.934-1.13)   | 0.60     | 0.48 | -0.00789  | 0.99214 (0.854-1.15) | 0.92 | 0 |
| LKT_s_Lachnospira_eligens                | 0.0666   | 1.0688 (0.929-1.23)   | 0.35     | 0.40 | -0.00796  | 0.99208 (0.802-1.23) | 0.94 | 0 |
| LKT_s_Streptococcus_Unclassified         | -0.00988 | 0.99017 (0.896-1.09)  | 0.85     | 0.56 | -0.0103   | 0.98971 (0.752-1.3)  | 0.94 | 1 |
| LKT_g_Haemophilus                        | 0.113    | 1.1199 (1-1.25)       | 0.05     | 0.21 | -0.0113   | 0.98876 (0.814-1.2)  | 0.91 | 0 |
| LKT_g_Butyricimonas                      | 0.0926   | 1.0971 (0.984-1.22)   | 0.10     | 0.23 | -0.0113   | 0.98877 (0.796-1.23) | 0.92 | 0 |
| LKT_o_Burkholderiales                    | 0.0134   | 1.0135 (0.907-1.13)   | 0.81     | 0.55 | -0.012    | 0.98803 (0.845-1.16) | 0.88 | 0 |
| LKT_s_Mogibacterium_diversum             | -0.204   | 0.81523 (0.712-0.934) | 3.18E-03 | 0.06 | -0.0126   | 0.98747 (0.716-1.36) | 0.94 | 1 |
| LKT_s_Alistipes_shahii                   | 0.035    | 1.0357 (0.95-1.13)    | 0.43     | 0.43 | -0.0127   | 0.98735 (0.845-1.15) | 0.87 | 0 |
| LKT_s_Eubacterium_ventriosum             | -0.0355  | 0.96517 (0.859-1.08)  | 0.55     | 0.48 | -0.0131   | 0.98697 (0.817-1.19) | 0.89 | 1 |
| LKT_s_Odoribacter_splanchnicus           | 0.0833   | 1.0868 (0.998-1.18)   | 0.06     | 0.21 | -0.0176   | 0.98257 (0.846-1.14) | 0.82 | 0 |
| LKT_s_Ruminococcus_callidus              | 0.0462   | 1.0473 (0.97-1.13)    | 0.24     | 0.33 | -0.019    | 0.98115 (0.822-1.17) | 0.83 | 0 |
| LKT_s_Cyclopora_cayetanensis             | 0.0554   | 1.0569 (0.887-1.26)   | 0.54     | 0.47 | -0.0236   | 0.9767 (0.753-1.27)  | 0.86 | 0 |
| LKT_s_Lachnospira_pectinoschiza          | 0.0368   | 1.0375 (0.957-1.12)   | 0.37     | 0.40 | -0.024    | 0.97624 (0.853-1.12) | 0.73 | 0 |
| LKT_g_Anaerostipes                       | -0.13    | 0.87828 (0.779-0.99)  | 0.03     | 0.21 | -0.0244   | 0.97592 (0.724-1.31) | 0.87 | 1 |
| LKT_s_Bacteroides_cellulosilyticus       | 0.0794   | 1.0827 (0.998-1.17)   | 0.06     | 0.21 | -0.0252   | 0.97513 (0.856-1.11) | 0.71 | 0 |
| LKT_s_Roseburia_Unclassified             | 0.0191   | 1.0193 (0.901-1.15)   | 0.76     | 0.53 | -0.0252   | 0.9751 (0.699-1.36)  | 0.88 | 0 |
| LKT_s_Bacteroides_nordii                 | 0.0367   | 1.0374 (0.947-1.14)   | 0.43     | 0.43 | -0.0265   | 0.97381 (0.818-1.16) | 0.77 | 0 |
| LKT_s_Streptococcus_salivarius           | -0.0308  | 0.96963 (0.894-1.05)  | 0.46     | 0.45 | -0.0273   | 0.97308 (0.761-1.24) | 0.83 | 1 |
| LKT_s_Klebsiella_variicola               | 0.018    | 1.0181 (0.9-1.15)     | 0.78     | 0.54 | -0.028    | 0.97238 (0.741-1.28) | 0.84 | 0 |
| LKT_f_Coriobacteriaceae                  | -0.0318  | 0.96869 (0.857-1.09)  | 0.61     | 0.49 | -0.0281   | 0.9723 (0.828-1.14)  | 0.73 | 1 |
| LKT_s_Enterococcus_faecium               | -0.0231  | 0.97718 (0.844-1.13)  | 0.76     | 0.53 | -0.0281   | 0.97227 (0.766-1.23) | 0.82 | 1 |
| LKT_s_Roseburia_faecis                   | 0.0131   | 1.0132 (0.93-1.1)     | 0.76     | 0.53 | -0.0282   | 0.97219 (0.84-1.12)  | 0.70 | 0 |
| LKT_s_Alloscardovia_omnicolens           | -0.0423  | 0.95858 (0.845-1.09)  | 0.51     | 0.47 | -0.0291   | 0.97133 (0.447-2.11) | 0.94 | 1 |
| LKT_s_Anaerotruncus_Unclassified         | 0.00612  | 1.0061 (0.895-1.13)   | 0.92     | 0.58 | -0.0315   | 0.96904 (0.729-1.29) | 0.83 | 0 |
| LKT_s_Bacteroides_dorei                  | 0.122    | 1.1301 (1.01-1.26)    | 0.03     | 0.21 | -0.0322   | 0.96836 (0.755-1.24) | 0.80 | 0 |
| LKT_s_Odoribacter_laneus                 | 0.0686   | 1.071 (0.99-1.16)     | 0.09     | 0.23 | -0.0322   | 0.96827 (0.8-1.17)   | 0.74 | 0 |
| LKT_s_Blaustia_coccoides                 | -0.217   | 0.80514 (0.694-0.934) | 4.16E-03 | 0.07 | -0.0341   | 0.9665 (0.75-1.25)   | 0.79 | 1 |
| LKT_s_Anaeromassilibacillus_Unclassified | -0.0453  | 0.95574 (0.861-1.06)  | 0.40     | 0.41 | -0.0349   | 0.9657 (0.788-1.18)  | 0.74 | 1 |
| LKT_g_Lactobacillus                      | 0.0621   | 1.0641 (0.951-1.19)   | 0.28     | 0.36 | -0.0353   | 0.96536 (0.752-1.24) | 0.78 | 0 |
| LKT_s_Dorea_longicatena                  | -0.0806  | 0.92257 (0.821-1.04)  | 0.18     | 0.30 | -0.0363   | 0.96435 (0.734-1.27) | 0.80 | 1 |
| LKT_s_Ruminococcus_torques               | -0.117   | 0.88972 (0.796-0.995) | 0.04     | 0.21 | -0.0385   | 0.96223 (0.714-1.3)  | 0.80 | 1 |
| LKT_s_Collinsella_aerofaciens            | 0.00824  | 1.0083 (0.943-1.08)   | 0.81     | 0.55 | -0.0394   | 0.96135 (0.814-1.13) | 0.64 | 0 |
| LKT_s_Barnesiella_intestinihominis       | 0.0213   | 1.0215 (0.947-1.1)    | 0.58     | 0.48 | -0.0408   | 0.96 (0.856-1.08)    | 0.49 | 0 |
| LKT_s_Longibaculum_muris                 | 0.0161   | 1.0162 (0.931-1.11)   | 0.72     | 0.51 | -0.0409   | 0.95991 (0.777-1.19) | 0.71 | 0 |
| LKT_s_Coriobacteriaceae_bacterium        | -0.0215  | 0.97872 (0.892-1.07)  | 0.65     | 0.49 | -0.0437   | 0.95729 (0.756-1.21) | 0.72 | 1 |
| LKT_s_Intestinibacter_bartlettii         | -0.0391  | 0.96163 (0.884-1.05)  | 0.37     | 0.40 | -0.0439   | 0.95707 (0.791-1.16) | 0.65 | 1 |
| LKT_s_Anaeromassilibacillus_senegalensis | -0.00662 | 0.9934 (0.907-1.09)   | 0.89     | 0.57 | -0.0439   | 0.95706 (0.76-1.21)  | 0.71 | 1 |
| LKT_s_Alistipes_communis                 | 0.063    | 1.0651 (0.977-1.16)   | 0.15     | 0.29 | -0.0457   | 0.95537 (0.827-1.1)  | 0.53 | 0 |
| LKT_s_Bacteroides_ovatus                 | 0.0714   | 1.074 (0.969-1.19)    | 0.17     | 0.30 | -0.0457   | 0.9553 (0.787-1.16)  | 0.64 | 0 |
| LKT_s_Roseburia_hominis                  | 0.0311   | 1.0315 (0.912-1.17)   | 0.62     | 0.49 | -0.0471   | 0.95395 (0.773-1.18) | 0.66 | 0 |
| LKT_s_Ruminococcus_lactaris              | -0.0306  | 0.96982 (0.85-1.11)   | 0.65     | 0.49 | -0.048    | 0.9531 (0.758-1.2)   | 0.68 | 1 |
| LKT_s_Coprobacillus_cateniformis         | -0.00198 | 0.99802 (0.894-1.11)  | 0.97     | 0.59 | -0.048    | 0.95316 (0.741-1.23) | 0.71 | 1 |
| LKT_s_Veillonella_dispar                 | 0.0883   | 1.0923 (0.975-1.22)   | 0.13     | 0.27 | -0.0495   | 0.95169 (0.696-1.3)  | 0.76 | 0 |
| LKT_s_Bacteroides_caccae                 | 0.15     | 1.1614 (1.05-1.29)    | 4.19E-03 | 0.07 | -0.053    | 0.94837 (0.797-1.13) | 0.55 | 0 |
| LKT_s_Agathobaculum_butyriciproducens    | 0.113    | 1.12 (0.97-1.29)      | 0.12     | 0.26 | -0.0535   | 0.94792 (0.738-1.22) | 0.68 | 0 |
| LKT_g_Parabacteroides                    | 0.0892   | 1.0933 (0.923-1.3)    | 0.30     | 0.37 | -0.0535   | 0.94788 (0.787-1.14) | 0.57 | 0 |
| LKT_s_Senegalimassilia_anaerobia         | -0.0257  | 0.97459 (0.883-1.08)  | 0.61     | 0.49 | -0.0546   | 0.94685 (0.578-1.55) | 0.83 | 1 |
| LKT_s_Acidimicrococcus_fermentans        | 0.154    | 1.1659 (1.04-1.31)    | 0.01     | 0.11 | -0.0559   | 0.94561 (0.697-1.28) | 0.72 | 0 |
| LKT_s_Parabacteroides_johnsonii          | 0.00692  | 1.0069 (0.921-1.1)    | 0.88     | 0.56 | -0.0572   | 0.94441 (0.814-1.1)  | 0.45 | 0 |
| LKT_s_Actinomyces_Unclassified           | -0.118   | 0.88901 (0.783-1.01)  | 0.07     | 0.22 | -0.0587   | 0.94301 (0.602-1.48) | 0.80 | 1 |
| LKT_s_Gemmiger_formicilis                | 0.00776  | 1.0078 (0.927-1.1)    | 0.86     | 0.56 | -0.0591   | 0.94259 (0.815-1.09) | 0.43 | 0 |
| LKT_s_Collinsella_tanakaiae              | -0.0724  | 0.93018 (0.831-1.04)  | 0.21     | 0.32 | -0.0595   | 0.94225 (0.667-1.33) | 0.74 | 1 |
| LKT_s_Bacteroides_salyersiae             | 0.0706   | 1.0731 (0.975-1.18)   | 0.15     | 0.28 | -0.061    | 0.94086 (0.782-1.13) | 0.52 | 0 |



|                                        |           |                       |          |      |         |                      |      |   |
|----------------------------------------|-----------|-----------------------|----------|------|---------|----------------------|------|---|
| LKT_f_Rikenellaceae                    | 0.096     | 1.1007 (0.939-1.29)   | 0.24     | 0.32 | -0.0613 | 0.94059 (0.781-1.13) | 0.52 | 0 |
| LKT_s_Bacteriophage_Unclassified       | 0.0563    | 1.0579 (0.958-1.17)   | 0.27     | 0.35 | -0.0633 | 0.93864 (0.775-1.14) | 0.52 | 0 |
| LKT_s_Bacteroides_ilei                 | 0.0798    | 1.0831 (0.998-1.18)   | 0.06     | 0.21 | -0.0643 | 0.93768 (0.766-1.15) | 0.53 | 0 |
| LKT_s_Clostridiaceae_bacterium         | -0.0443   | 0.95667 (0.793-1.15)  | 0.64     | 0.49 | -0.0643 | 0.93774 (0.662-1.33) | 0.72 | 1 |
| LKT_s_Bacteroides_finegoldii           | 0.069     | 1.0714 (0.969-1.18)   | 0.18     | 0.30 | -0.0698 | 0.93259 (0.773-1.13) | 0.47 | 0 |
| LKT_s_Oxalobacter_formigenes           | 0.242     | 1.2741 (1.12-1.45)    | 2.05E-04 | 0.01 | -0.0701 | 0.93226 (0.726-1.12) | 0.58 | 0 |
| LKT_s_Clostridiales_bacterium          | 0.0872    | 1.0911 (0.886-1.34)   | 0.41     | 0.42 | -0.0707 | 0.93175 (0.644-1.35) | 0.71 | 0 |
| LKT_s_Eubacterium_siraenum             | 0.063     | 1.065 (0.964-1.18)    | 0.22     | 0.32 | -0.0714 | 0.93112 (0.797-1.09) | 0.37 | 0 |
| LKT_s_Schaalia_odontolytica            | -0.124    | 0.88369 (0.789-0.99)  | 0.03     | 0.21 | -0.0722 | 0.93033 (0.572-1.51) | 0.77 | 1 |
| LKT_s_Candidatus_Borkfalkia            | 0.047     | 1.0481 (0.96-1.14)    | 0.30     | 0.37 | -0.0725 | 0.93005 (0.801-1.08) | 0.34 | 0 |
| LKT_s_Bacteroidaceae_bacterium         | 0.0762    | 1.0792 (0.987-1.18)   | 0.10     | 0.23 | -0.0728 | 0.92981 (0.806-1.07) | 0.32 | 0 |
| LKT_s_Clostridia_bacterium             | -0.0303   | 0.97012 (0.878-1.07)  | 0.55     | 0.48 | -0.0728 | 0.92983 (0.727-1.19) | 0.56 | 1 |
| LKT_s_Streptococcus_thermophilus       | -0.0525   | 0.94888 (0.873-1.03)  | 0.22     | 0.32 | -0.0737 | 0.92894 (0.736-1.17) | 0.53 | 1 |
| LKT_s_Parabacteroides_distasonis       | 0.0137    | 1.0138 (0.934-1.1)    | 0.74     | 0.52 | -0.0742 | 0.92848 (0.807-1.07) | 0.30 | 0 |
| LKT_s_Porphyromonas_asaccharolytica    | 0.094     | 1.0986 (0.994-1.21)   | 0.07     | 0.22 | -0.0757 | 0.92708 (0.701-1.23) | 0.60 | 0 |
| LKT_s_Alistipes_finegoldii             | 0.0259    | 1.0262 (0.937-1.12)   | 0.58     | 0.48 | -0.0763 | 0.92652 (0.826-1.04) | 0.19 | 0 |
| LKT_s_Streptococcus_oralis             | 0.00302   | 1.003 (0.873-1.15)    | 0.97     | 0.59 | -0.0764 | 0.92645 (0.554-1.55) | 0.77 | 0 |
| LKT_s_Bifidobacterium_gallinarum       | -0.0253   | 0.97499 (0.847-1.12)  | 0.73     | 0.52 | -0.0781 | 0.92491 (0.267-3.2)  | 0.90 | 1 |
| LKT_s_Sutterella_Unclassified          | -0.00912  | 0.99092 (0.895-1.1)   | 0.86     | 0.56 | -0.0787 | 0.92431 (0.765-1.12) | 0.42 | 1 |
| LKT_s_Ruminococcus_bromii              | 0.0598    | 1.0617 (0.963-1.17)   | 0.23     | 0.32 | -0.0794 | 0.92371 (0.774-1.1)  | 0.38 | 0 |
| LKT_s_Bacteroides_faecis               | 0.098     | 1.103 (0.989-1.23)    | 0.08     | 0.23 | -0.0802 | 0.92294 (0.604-1.41) | 0.71 | 0 |
| LKT_s_Sporobacter_termitidis           | 0.0878    | 1.0918 (0.98-1.22)    | 0.11     | 0.25 | -0.0828 | 0.92052 (0.731-1.16) | 0.48 | 0 |
| LKT_s_Parabacteroides_goldsteini       | 0.0239    | 1.0242 (0.942-1.11)   | 0.58     | 0.48 | -0.0828 | 0.9205 (0.767-1.1)   | 0.37 | 0 |
| LKT_s_Holdemania_Unclassified          | -0.00541  | 0.99461 (0.885-1.12)  | 0.93     | 0.58 | -0.0853 | 0.91822 (0.738-1.14) | 0.44 | 1 |
| LKT_s_Holdemania_filiformis            | 0.028     | 1.0284 (0.904-1.17)   | 0.67     | 0.49 | -0.0854 | 0.9181 (0.771-1.09)  | 0.34 | 0 |
| LKT_s_Clostridium_phoceensis           | 0.0339    | 1.0344 (0.893-1.2)    | 0.65     | 0.49 | -0.0891 | 0.91476 (0.756-1.11) | 0.36 | 0 |
| LKT_s_Bittarella_massiliensis          | -0.074    | 0.92868 (0.795-1.08)  | 0.35     | 0.40 | -0.0894 | 0.91445 (0.673-1.24) | 0.57 | 1 |
| LKT_s_Clostridium_perfringens          | 0.0173    | 1.0174 (0.926-1.12)   | 0.72     | 0.51 | -0.09   | 0.91396 (0.743-1.12) | 0.39 | 0 |
| LKT_s_Blaugia_massiliensis             | -0.0147   | 0.98539 (0.906-1.07)  | 0.73     | 0.52 | -0.0908 | 0.91322 (0.624-1.34) | 0.64 | 1 |
| LKT_f_Sutterellaceae                   | 0.0432    | 1.0442 (0.945-1.15)   | 0.40     | 0.41 | -0.0917 | 0.91237 (0.746-1.12) | 0.37 | 0 |
| LKT_s_Blaugia_hanseni                  | -0.0817   | 0.92151 (0.832-1.02)  | 0.12     | 0.26 | -0.0922 | 0.91192 (0.698-1.19) | 0.50 | 1 |
| LKT_s_Eubacterium_rectale              | -0.079    | 0.92403 (0.828-1.03)  | 0.16     | 0.29 | -0.0959 | 0.90859 (0.686-1.2)  | 0.50 | 1 |
| LKT_s_Streptococcus_viridans           | -0.0714   | 0.9311 (0.798-1.09)   | 0.36     | 0.40 | -0.0985 | 0.9062 (0.456-1.8)   | 0.78 | 1 |
| LKT_s_Alistipes_anderdonkii            | 0.0157    | 1.0158 (0.942-1.1)    | 0.69     | 0.50 | -0.0993 | 0.9055 (0.808-1.02)  | 0.09 | 0 |
| LKT_s_Blaugia_hydrogenotrophica        | -0.109    | 0.89695 (0.805-1)     | 0.05     | 0.21 | -0.0995 | 0.90525 (0.695-1.18) | 0.46 | 1 |
| LKT_s_Fusicatenibacter_Unclassified    | -0.0511   | 0.95022 (0.846-1.07)  | 0.39     | 0.41 | -0.0995 | 0.90527 (0.686-1.12) | 0.48 | 1 |
| LKT_s_Subdoligranulum_variabile        | 0.0693    | 1.0717 (0.943-1.22)   | 0.29     | 0.37 | -0.101  | 0.90369 (0.725-1.13) | 0.37 | 0 |
| LKT_s_Anaerotruncus_massiliensis       | 0.0436    | 1.0446 (0.949-1.15)   | 0.37     | 0.40 | -0.102  | 0.90323 (0.738-1.11) | 0.33 | 0 |
| LKT_s_Butyricoccus_pullicaeorum        | 0.0384    | 1.0391 (0.92-1.17)    | 0.54     | 0.47 | -0.102  | 0.90318 (0.715-1.14) | 0.39 | 0 |
| LKT_s_Phascocartobacterium_faecium     | 0.0197    | 1.0199 (0.953-1.09)   | 0.57     | 0.48 | -0.102  | 0.9032 (0.802-1.02)  | 0.09 | 0 |
| LKT_s_Turcibacter_sanguinis            | 0.0514    | 1.0527 (0.967-1.15)   | 0.24     | 0.32 | -0.103  | 0.90237 (0.688-1.18) | 0.46 | 0 |
| LKT_s_Alistipes_timonensis             | 0.102     | 1.1076 (0.988-1.24)   | 0.08     | 0.23 | -0.104  | 0.90094 (0.758-1.07) | 0.24 | 0 |
| LKT_s_Flintibacter_Unclassified        | 0.0817    | 1.0851 (0.959-1.23)   | 0.20     | 0.32 | -0.104  | 0.90131 (0.694-1.17) | 0.44 | 0 |
| LKT_s_Bifidobacterium_adolescentis     | -0.0488   | 0.95233 (0.884-1.03)  | 0.20     | 0.32 | -0.104  | 0.90127 (0.748-1.09) | 0.27 | 1 |
| LKT_o_Bacillales                       | 0.0221    | 1.0223 (0.855-1.22)   | 0.81     | 0.55 | -0.104  | 0.90165 (0.685-1.19) | 0.46 | 0 |
| LKT_s_Bacteroides_vulgatus             | 0.0984    | 1.1034 (0.967-1.26)   | 0.14     | 0.28 | -0.106  | 0.89962 (0.66-1.23)  | 0.50 | 0 |
| LKT_s_Allisonella_histaminiformans     | 0.0921    | 1.0965 (0.946-1.27)   | 0.22     | 0.32 | -0.107  | 0.89827 (0.646-1.25) | 0.52 | 0 |
| LKT_f_Clostridiaceae                   | 0.148     | 1.1592 (0.876-1.53)   | 0.30     | 0.37 | -0.107  | 0.89878 (0.61-1.32)  | 0.59 | 0 |
| LKT_s_Subdoligranulum_Unclassified     | 0.104     | 1.1091 (0.946-1.3)    | 0.20     | 0.32 | -0.113  | 0.89306 (0.629-1.27) | 0.53 | 0 |
| LKT_s_Bifidobacterium_longum           | -0.0262   | 0.97417 (0.902-1.05)  | 0.51     | 0.47 | -0.113  | 0.89311 (0.763-1.05) | 0.16 | 1 |
| LKT_g_Alistipes                        | 0.0348    | 1.0354 (0.889-1.21)   | 0.65     | 0.49 | -0.113  | 0.89338 (0.755-1.06) | 0.19 | 0 |
| LKT_s_Victivallae_bacterium            | 0.0828    | 1.0863 (0.997-1.18)   | 0.06     | 0.21 | -0.115  | 0.89151 (0.631-1.26) | 0.52 | 0 |
| LKT_s_Coproibacter_fastidiosus         | 0.0532    | 1.0546 (0.962-1.16)   | 0.26     | 0.34 | -0.115  | 0.89135 (0.756-1.05) | 0.17 | 0 |
| LKT_s_Enterobacter_hormaechei          | 0.0461    | 1.0472 (0.956-1.15)   | 0.32     | 0.38 | -0.115  | 0.89125 (0.641-1.24) | 0.49 | 0 |
| LKT_s_Anaerostipes_caccae              | -0.119    | 0.88746 (0.791-0.995) | 0.04     | 0.21 | -0.116  | 0.89054 (0.628-1.26) | 0.52 | 1 |
| LKT_s_Faecalibacterium_prausnitzii     | 0.0824    | 1.0859 (0.948-1.24)   | 0.23     | 0.32 | -0.116  | 0.8905 (0.714-1.11)  | 0.30 | 0 |
| LKT_s_Coproccoccus_comes               | -0.0709   | 0.9316 (0.821-1.06)   | 0.27     | 0.35 | -0.12   | 0.88666 (0.707-1.11) | 0.30 | 1 |
| LKT_f_Oscillospiraceae                 | -0.0146   | 0.98555 (0.817-1.19)  | 0.88     | 0.56 | -0.12   | 0.88678 (0.697-1.13) | 0.33 | 1 |
| LKT_s_Oscillibacter_valericigenes      | 0.104     | 1.1097 (0.965-1.28)   | 0.14     | 0.28 | -0.121  | 0.8856 (0.725-1.08)  | 0.23 | 0 |
| LKT_s_Firmicutes_bacterium             | -0.107    | 0.89816 (0.784-1.03)  | 0.12     | 0.26 | -0.122  | 0.88505 (0.662-1.18) | 0.41 | 1 |
| LKT_s_Intestinimonas_massiliensis      | 0.116     | 1.1225 (0.941-1.34)   | 0.20     | 0.32 | -0.122  | 0.88496 (0.645-1.21) | 0.45 | 0 |
| LKT_s_Lactobacillus_crispatus          | -0.0547   | 0.94676 (0.845-1.06)  | 0.35     | 0.39 | -0.122  | 0.88481 (0.66-1.19)  | 0.41 | 1 |
| LKT_s_Rikenellaceae_bacterium          | 0.0387    | 1.0395 (0.93-1.16)    | 0.50     | 0.46 | -0.122  | 0.88491 (0.734-1.07) | 0.20 | 0 |
| LKT_s_Ruminococcus_champanelensis      | 0.0744    | 1.0773 (0.963-1.21)   | 0.19     | 0.32 | -0.124  | 0.88322 (0.702-1.11) | 0.29 | 0 |
| LKT_f_Lachnospiraceae                  | -0.431    | 0.64976 (0.469-0.9)   | 0.01     | 0.11 | -0.125  | 0.88212 (0.402-1.94) | 0.75 | 1 |
| LKT_s_Bacteroides_xylanisolvens        | 0.00351   | 1.0035 (0.903-1.12)   | 0.95     | 0.59 | -0.125  | 0.88292 (0.675-1.15) | 0.36 | 0 |
| LKT_g_Ruminococcus                     | -0.000565 | 0.99943 (0.842-1.19)  | 1.00     | 0.60 | -0.125  | 0.88256 (0.582-1.34) | 0.56 | 1 |
| LKT_g_Pseudoflavonifractor             | 0.137     | 1.1471 (0.996-1.32)   | 0.06     | 0.21 | -0.126  | 0.88157 (0.695-1.12) | 0.30 | 0 |
| LKT_s_Clostridium_disporicum           | 0.0182    | 1.0184 (0.941-1.1)    | 0.65     | 0.49 | -0.127  | 0.88092 (0.722-1.08) | 0.21 | 0 |
| LKT_s_Ruthenibacterium_lactatiformans  | 0.0845    | 1.0882 (0.97-1.22)    | 0.15     | 0.29 | -0.13   | 0.87801 (0.63-1.22)  | 0.44 | 0 |
| LKT_f_Synergistaceae                   | 0.0173    | 1.0174 (0.89-1.16)    | 0.80     | 0.55 | -0.13   | 0.87845 (0.624-1.24) | 0.46 | 0 |
| LKT_s_Ruminococcus_Unclassified        | -0.0155   | 0.98459 (0.863-1.12)  | 0.82     | 0.55 | -0.13   | 0.8782 (0.656-1.17)  | 0.38 | 1 |
| LKT_s_Arabia_massiliensis              | -0.00498  | 0.99503 (0.885-1.12)  | 0.93     | 0.58 | -0.132  | 0.87627 (0.481-1.6)  | 0.67 | 1 |
| LKT_s_Alistipes_senegalensis           | 0.105     | 1.1106 (1.01-1.23)    | 0.04     | 0.21 | -0.134  | 0.87422 (0.746-1.02) | 0.10 | 0 |
| LKT_s_Eubacterium_candleri             | -0.0314   | 0.96907 (0.881-1.07)  | 0.52     | 0.47 | -0.134  | 0.87466 (0.653-1.17) | 0.37 | 1 |
| LKT_f_Erysipelotrichaceae              | -0.209    | 0.81155 (0.668-0.986) | 0.04     | 0.21 | -0.135  | 0.87388 (0.55-1.39)  | 0.57 | 1 |
| LKT_s_Ruminococcus_flavofaciens        | 0.0887    | 1.0928 (0.97-1.23)    | 0.14     | 0.28 | -0.137  | 0.87223 (0.731-1.04) | 0.13 | 0 |
| LKT_s_Agathobaculum_desmolans          | 0.109     | 1.1154 (0.949-1.31)   | 0.19     | 0.31 | -0.138  | 0.87107 (0.606-1.25) | 0.46 | 0 |
| LKT_s_Clostridium_innocuum             | -0.0587   | 0.94302 (0.845-1.05)  | 0.30     | 0.37 | -0.14   | 0.86942 (0.578-1.31) | 0.50 | 1 |
| LKT_s_Roseburia_intestinalis           | -0.0619   | 0.93996 (0.83-1.06)   | 0.33     | 0.38 | -0.141  | 0.8683 (0.662-1.14)  | 0.31 | 1 |
| LKT_s_Streptomyces_Unclassified        | 0.147     | 1.1586 (1.02-1.32)    | 0.03     | 0.21 | -0.143  | 0.86698 (0.666-1.13) | 0.29 | 0 |
| LKT_s_Oscillibacter_ruminantium        | 0.0753    | 1.0782 (0.948-1.23)   | 0.25     | 0.34 | -0.144  | 0.8656 (0.694-1.08)  | 0.20 | 0 |
| LKT_s_Dysosmobacter_welbionis          | 0.087     | 1.0908 (0.923-1.29)   | 0.31     | 0.37 | -0.145  | 0.86486 (0.612-1.22) | 0.41 | 0 |
| LKT_s_Frisingicoccus_caecimuris        | -0.0258   | 0.97453 (0.874-1.09)  | 0.64     | 0.49 | -0.145  | 0.86493 (0.66-1.13)  | 0.29 | 1 |
| LKT_g_Faecalibacterium                 | 0.14      | 1.1503 (0.979-1.35)   | 0.09     | 0.23 | -0.149  | 0.86127 (0.693-1.07) | 0.18 | 0 |
| LKT_s_Anaerostipes_hadrus              | -0.0505   | 0.95073 (0.88-1.03)   | 0.20     | 0.32 | -0.149  | 0.86157 (0.711-1.04) | 0.13 | 1 |
| LKT_s_Methanobrevibacter_smithii       | -0.0157   | 0.98444 (0.912-1.06)  | 0.69     | 0.50 | -0.149  | 0.86167 (0.575-1.29) | 0.47 | 1 |
| LKT_s_Intestinimonas_butyliciproducens | 0.0734    | 1.0762 (0.955-1.21)   | 0.23     | 0.32 | -0.15   | 0.86113 (0.676-1.1)  | 0.23 | 0 |
| LKT_s_Muribaculaceae_bacterium         | 0.0887    | 1.0927 (0.985-1.21)   | 0.09     | 0.23 | -0.153  | 0.8578 (0.69-1.07)   | 0.17 | 0 |
| LKT_s_Eubacteriaceae_bacterium         | -0.0969   | 0.90768 (0.809-1.02)  | 0.10     | 0.23 | -0.153  | 0.85849 (0.64-1.15)  | 0.31 | 1 |

|                                                     |            |                       |      |      |        |                       |      |   |
|-----------------------------------------------------|------------|-----------------------|------|------|--------|-----------------------|------|---|
| LKT_s_Parabacteroides_Unclassified                  | 0.041      | 1.0418 (0.943-1.15)   | 0.42 | 0.43 | -0.153 | 0.85784 (0.734-1)     | 0.05 | 0 |
| LKT_s_Lactobacillus_rhannosus                       | 0.122      | 1.1296 (1.02-1.25)    | 0.01 | 0.14 | -0.154 | 0.85766 (0.605-1.22)  | 0.39 | 0 |
| LKT_s_Coproccoccus_catus                            | -0.0375    | 0.96323 (0.848-1.09)  | 0.57 | 0.48 | -0.155 | 0.85617 (0.574-1.28)  | 0.45 | 1 |
| LKT_s_Duncanella_Unclassified                       | 0.0901     | 1.0942 (0.974-1.23)   | 0.13 | 0.27 | -0.156 | 0.85552 (0.663-1.1)   | 0.23 | 0 |
| LKT_s_Cloacibacillus_evryensis                      | 0.00244    | 1.0024 (0.889-1.13)   | 0.97 | 0.59 | -0.158 | 0.85376 (0.457-1.59)  | 0.62 | 0 |
| LKT_s_Phascloarctobacterium_succinatutens           | 0.00356    | 1.0036 (0.917-1.1)    | 0.94 | 0.58 | -0.159 | 0.85275 (0.712-1.02)  | 0.08 | 0 |
| LKT_s_Ruminococcaceae_bacterium                     | -0.0572    | 0.94441 (0.79-1.1)    | 0.53 | 0.47 | -0.16  | 0.85249 (0.647-1.12)  | 0.26 | 1 |
| LKT_k_Bacteria                                      | 0.733      | 2.0817 (1.24-3.5)     | 0.01 | 0.08 | -0.163 | 0.84973 (0.288-2.5)   | 0.77 | 0 |
| LKT_g_Coprobacillus                                 | -0.0276    | 0.97276 (0.865-1.09)  | 0.64 | 0.49 | -0.164 | 0.84901 (0.687-1.05)  | 0.13 | 1 |
| LKT_s_Neglecta_timonensis                           | -0.0723    | 0.93028 (0.846-1.02)  | 0.14 | 0.27 | -0.166 | 0.84702 (0.686-1.05)  | 0.12 | 1 |
| LKT_s_Gordonibacter_uroolithfaciens                 | -0.0675    | 0.93474 (0.854-1.02)  | 0.14 | 0.28 | -0.168 | 0.84501 (0.607-1.18)  | 0.32 | 1 |
| LKT_s_Clostridium_spiroforme                        | -0.011     | 0.98907 (0.903-1.08)  | 0.81 | 0.55 | -0.168 | 0.84497 (0.677-1.05)  | 0.14 | 1 |
| LKT_s_Blaulia_wexlerae                              | -0.108     | 0.89784 (0.814-0.99)  | 0.03 | 0.21 | -0.171 | 0.84255 (0.627-1.13)  | 0.26 | 1 |
| LKT_g_Butyricoccus                                  | -0.0368    | 0.96383 (0.822-1.13)  | 0.65 | 0.49 | -0.175 | 0.83986 (0.629-1.12)  | 0.24 | 1 |
| LKT_s_Phocaea_massiliensis                          | -0.0318    | 0.96867 (0.819-1.15)  | 0.71 | 0.51 | -0.176 | 0.83882 (0.629-1.12)  | 0.23 | 1 |
| LKT_s_Eubacterium_ramulus                           | -0.0289    | 0.97152 (0.876-1.08)  | 0.58 | 0.48 | -0.177 | 0.83779 (0.677-1.04)  | 0.10 | 1 |
| LKT_s_Anaerofustis_stercorihominis                  | -0.0541    | 0.94736 (0.829-1.08)  | 0.43 | 0.43 | -0.178 | 0.83713 (0.639-1.1)   | 0.20 | 1 |
| LKT_s_Flavonifractor_plautii                        | 0.00229    | 1.0023 (0.826-1.22)   | 0.98 | 0.59 | -0.178 | 0.83727 (0.555-1.26)  | 0.40 | 0 |
| LKT_s_Marvinbryantia_formatexigens                  | 0.00512    | 1.0525 (0.912-1.21)   | 0.48 | 0.46 | -0.179 | 0.83573 (0.624-1.12)  | 0.23 | 0 |
| LKT_s_Eisenbergiella_massiliensis                   | -0.102     | 0.90267 (0.811-1)     | 0.06 | 0.21 | -0.18  | 0.83494 (0.643-1.08)  | 0.18 | 1 |
| LKT_s_Lachnospira_multipara                         | -0.037     | 0.96365 (0.854-1.09)  | 0.55 | 0.48 | -0.183 | 0.83253 (0.593-1.17)  | 0.29 | 1 |
| LKT_s_Alistipes_Unclassified                        | 0.0352     | 1.0359 (0.953-1.13)   | 0.41 | 0.42 | -0.184 | 0.83178 (0.685-1.01)  | 0.06 | 0 |
| LKT_s_Lactococcus_lactis                            | -0.005     | 0.99501 (0.885-1.12)  | 0.93 | 0.58 | -0.185 | 0.83129 (0.566-1.22)  | 0.35 | 1 |
| LKT_s_Terrisporobacter_glycolicus                   | 0.0495     | 1.0508 (0.939-1.18)   | 0.39 | 0.41 | -0.186 | 0.83062 (0.534-1.29)  | 0.41 | 0 |
| LKT_f_Eubacteriaceae                                | 0.0904     | 1.0946 (0.964-1.24)   | 0.16 | 0.29 | -0.187 | 0.82928 (0.659-1.04)  | 0.11 | 0 |
| LKT_s_Clostridium_viride                            | -0.0628    | 0.93916 (0.82-1.08)   | 0.37 | 0.40 | -0.187 | 0.8293 (0.6-1.15)     | 0.26 | 1 |
| LKT_s_Bifidobacterium_bifidum                       | -0.0209    | 0.97932 (0.889-1.08)  | 0.67 | 0.49 | -0.187 | 0.82955 (0.625-1.1)   | 0.20 | 1 |
| LKT_s_Faecalibacterium_Unclassified                 | 0.13       | 1.1385 (1.02-1.27)    | 0.02 | 0.19 | -0.193 | 0.82434 (0.666-1.02)  | 0.08 | 0 |
| LKT_s_Clostridium_botulinum                         | 0.0627     | 1.0647 (0.963-1.18)   | 0.22 | 0.32 | -0.195 | 0.82269 (0.674-1)     | 0.06 | 0 |
| LKT_s_Pseudomonas_aeruginosa                        | 0.0209     | 1.0211 (0.943-1.11)   | 0.61 | 0.49 | -0.195 | 0.82309 (0.708-0.956) | 0.01 | 0 |
| LKT_s_Alistipes_indistinctus                        | 0.0241     | 1.0244 (0.949-1.11)   | 0.54 | 0.47 | -0.196 | 0.82226 (0.672-1.01)  | 0.06 | 0 |
| LKT_s_Raoultibacter_massiliensis                    | -0.0196    | 0.98055 (0.895-1.07)  | 0.67 | 0.49 | -0.197 | 0.82134 (0.462-1.46)  | 0.50 | 1 |
| LKT_s_Slackia_piriformis                            | -0.0189    | 0.98132 (0.907-1.06)  | 0.64 | 0.49 | -0.198 | 0.82037 (0.438-1.54)  | 0.54 | 1 |
| LKT_s_Angelakissella_massiliensis                   | 0.17       | 1.1858 (1.01-1.39)    | 0.04 | 0.21 | -0.199 | 0.81951 (0.614-1.09)  | 0.18 | 0 |
| LKT_s_Harryflintia_acetispora                       | 0.0335     | 1.0341 (0.909-1.18)   | 0.61 | 0.49 | -0.2   | 0.81844 (0.629-1.06)  | 0.14 | 0 |
| LKT_g_Clostridium                                   | 0.218      | 1.2431 (0.999-1.55)   | 0.05 | 0.21 | -0.202 | 0.81712 (0.642-1.04)  | 0.10 | 0 |
| LKT_s_Clostridium_methylpentosum                    | -0.0961    | 0.90841 (0.815-1.01)  | 0.08 | 0.23 | -0.208 | 0.81232 (0.592-1.11)  | 0.20 | 1 |
| LKT_s_Clostridium_leptum                            | -0.0922    | 0.91188 (0.819-1.01)  | 0.09 | 0.23 | -0.21  | 0.81021 (0.643-1.02)  | 0.07 | 1 |
| LKT_s_Lachnodostridium_phocaeense                   | 0.0484     | 1.0496 (0.916-1.2)    | 0.49 | 0.46 | -0.21  | 0.81039 (0.616-1.07)  | 0.13 | 0 |
| LKT_s_Lachnospiraceae_bacterium                     | -0.265     | 0.76697 (0.633-0.93)  | 0.01 | 0.08 | -0.211 | 0.81 (0.505-1.3)      | 0.38 | 1 |
| LKT_s_Bacillus_Unclassified                         | 0.199      | 1.2196 (1.04-1.43)    | 0.02 | 0.14 | -0.214 | 0.80735 (0.638-1.02)  | 0.08 | 0 |
| LKT_s_Fusicatenibacter_saccharivorans               | -0.0467    | 0.95438 (0.862-1.06)  | 0.37 | 0.40 | -0.214 | 0.807 (0.592-1.1)     | 0.18 | 1 |
| LKT_s_Anaerofistula_lactatifermentans               | 0.0637     | 1.0658 (0.933-1.22)   | 0.35 | 0.39 | -0.217 | 0.80476 (0.631-1.03)  | 0.08 | 0 |
| LKT_c_Actinobacteria                                | 0.138      | 1.1477 (0.965-1.37)   | 0.12 | 0.26 | -0.218 | 0.80384 (0.602-1.07)  | 0.14 | 0 |
| LKT_s_Coproccoccus_eutactus                         | 0.0723     | 1.0749 (0.937-1.23)   | 0.30 | 0.37 | -0.218 | 0.80388 (0.593-1.09)  | 0.16 | 0 |
| LKT_s_Bacteroides_fragilis                          | 0.0459     | 1.047 (0.923-1.19)    | 0.47 | 0.45 | -0.219 | 0.80333 (0.559-1.15)  | 0.24 | 0 |
| LKT_s_Coprobacillus_Unclassified                    | -0.0478    | 0.95328 (0.866-1.05)  | 0.33 | 0.38 | -0.22  | 0.80224 (0.597-1.08)  | 0.14 | 1 |
| LKT_s_Sharpeya_azabuensis                           | -0.0143    | 0.98576 (0.866-1.12)  | 0.83 | 0.55 | -0.222 | 0.80095 (0.592-1.08)  | 0.15 | 1 |
| LKT_s_Intestinimonas_timonensis                     | 0.0575     | 1.0592 (0.911-1.23)   | 0.45 | 0.45 | -0.223 | 0.79984 (0.625-1.02)  | 0.08 | 0 |
| LKT_s_Porphyromonas_uenonis                         | 0.11       | 1.1162 (0.99-1.26)    | 0.07 | 0.23 | -0.225 | 0.7987 (0.531-1.2)    | 0.28 | 0 |
| LKT_s_Bacteroides_uniformis                         | 0.0819     | 1.0854 (0.965-1.22)   | 0.17 | 0.30 | -0.226 | 0.79771 (0.624-1.02)  | 0.07 | 0 |
| LKT_s_Fournierella_massiliensis                     | 0.115      | 1.1213 (1-1.25)       | 0.04 | 0.21 | -0.235 | 0.7902 (0.637-0.98)   | 0.03 | 0 |
| LKT_s_Erysipelotrichaceae_bacterium                 | -0.0000221 | 0.99998 (0.894-1.12)  | 1.00 | 0.60 | -0.236 | 0.78947 (0.578-1.08)  | 0.14 | 1 |
| LKT_s_Holdemanelia_biformis                         | 0.0322     | 1.0328 (0.925-1.15)   | 0.57 | 0.48 | -0.24  | 0.78645 (0.585-1.06)  | 0.11 | 0 |
| LKT_s_Bariatricus_massiliensis                      | -0.0258    | 0.97454 (0.852-1.11)  | 0.71 | 0.51 | -0.24  | 0.78672 (0.565-1.1)   | 0.16 | 1 |
| LKT_s_Eubacterium_Unclassified                      | 0.0117     | 1.0117 (0.905-1.13)   | 0.84 | 0.55 | -0.24  | 0.78695 (0.582-1.06)  | 0.12 | 0 |
| LKT_p_Firmicutes                                    | -0.115     | 0.89103 (0.631-1.26)  | 0.51 | 0.47 | -0.242 | 0.78513 (0.44-1.4)    | 0.41 | 1 |
| LKT_s_Clostridium_sporosphaeroides                  | -0.0108    | 0.98922 (0.904-1.08)  | 0.81 | 0.55 | -0.242 | 0.78492 (0.588-1.05)  | 0.10 | 1 |
| LKT_s_Blaulia_obum                                  | -0.114     | 0.89209 (0.782-1.02)  | 0.09 | 0.23 | -0.246 | 0.78225 (0.51-1.2)    | 0.26 | 1 |
| LKT_s_Bacteroidales_bacterium                       | 0.0827     | 1.0862 (0.999-1.18)   | 0.05 | 0.21 | -0.255 | 0.77506 (0.559-1.07)  | 0.13 | 0 |
| LKT_s_Pseudoflavonifractor_Unclassified             | 0.0841     | 1.0877 (0.939-1.26)   | 0.26 | 0.34 | -0.255 | 0.77512 (0.567-1.06)  | 0.11 | 0 |
| LKT_s_Blaulia_producta                              | -0.191     | 0.82575 (0.721-0.946) | 0.01 | 0.08 | -0.256 | 0.77424 (0.543-1.1)   | 0.16 | 0 |
| LKT_o_Bacteroidales                                 | 0.229      | 1.2573 (1-1.57)       | 0.05 | 0.21 | -0.26  | 0.77104 (0.21-2.83)   | 0.70 | 0 |
| LKT_s_Muribaculum_Unclassified                      | 0.108      | 1.1137 (1-1.24)       | 0.04 | 0.21 | -0.266 | 0.76639 (0.534-1.1)   | 0.15 | 0 |
| LKT_s_Eubacterium_limosum                           | -0.0749    | 0.92781 (0.817-1.05)  | 0.25 | 0.33 | -0.271 | 0.76256 (0.492-1.18)  | 0.23 | 1 |
| LKT_s_Paenibacillus_Unclassified                    | 0.142      | 1.1524 (0.97-1.37)    | 0.11 | 0.25 | -0.283 | 0.75356 (0.532-1.07)  | 0.11 | 0 |
| LKT_s_Blaulia_schinkii                              | -0.0316    | 0.96891 (0.84-1.12)   | 0.67 | 0.49 | -0.283 | 0.75338 (0.523-1.08)  | 0.13 | 1 |
| LKT_s_Clostridium_scindens                          | -0.122     | 0.88513 (0.792-0.989) | 0.03 | 0.21 | -0.29  | 0.74854 (0.46-1.22)   | 0.24 | 1 |
| LKT_g_Bacillus                                      | 0.101      | 1.1063 (0.948-1.29)   | 0.20 | 0.32 | -0.291 | 0.74774 (0.552-1.01)  | 0.06 | 0 |
| LKT_s_Butyrvibrio_Unclassified                      | 0.0699     | 1.0724 (0.914-1.26)   | 0.39 | 0.41 | -0.297 | 0.74329 (0.558-0.989) | 0.04 | 0 |
| LKT_s_Dorea_Unclassified                            | -0.0969    | 0.90765 (0.793-1.04)  | 0.16 | 0.29 | -0.299 | 0.74143 (0.536-1.03)  | 0.07 | 1 |
| LKT_g_Dorea                                         | -0.0857    | 0.91785 (0.797-1.06)  | 0.24 | 0.32 | -0.302 | 0.739 (0.416-1.31)    | 0.30 | 1 |
| LKT_s_Proteiniborus_ethanoligenes                   | 0.0283     | 1.0287 (0.93-1.14)    | 0.58 | 0.48 | -0.305 | 0.73703 (0.212-2.56)  | 0.63 | 0 |
| LKT_s_Clostridium_Unclassified                      | 0.0912     | 1.0955 (0.862-1.39)   | 0.46 | 0.45 | -0.308 | 0.73481 (0.508-1.06)  | 0.10 | 0 |
| LKT_s_Blaulia_Unclassified                          | -0.106     | 0.89925 (0.798-1.01)  | 0.08 | 0.23 | -0.31  | 0.73324 (0.502-1.07)  | 0.11 | 1 |
| LKT_s_Intestinibacillus_massiliensis                | 0.0642     | 1.0663 (0.935-1.22)   | 0.34 | 0.39 | -0.311 | 0.73239 (0.53-1.01)   | 0.06 | 0 |
| LKT_g_Eubacterium                                   | 0.044      | 1.0449 (0.909-1.2)    | 0.54 | 0.47 | -0.316 | 0.72895 (0.535-0.993) | 0.04 | 0 |
| LKT_s_Christensenella_minuta                        | 0.101      | 1.1065 (0.995-1.23)   | 0.06 | 0.21 | -0.32  | 0.72646 (0.504-1.05)  | 0.09 | 0 |
| LKT_s_Bifidobacterium_animalis                      | 0.0484     | 1.0496 (0.951-1.16)   | 0.34 | 0.39 | -0.34  | 0.71169 (0.311-1.63)  | 0.42 | 0 |
| LKT_s_Ruminococcus_albus                            | 0.0664     | 1.0686 (0.935-1.22)   | 0.33 | 0.39 | -0.376 | 0.68659 (0.493-0.957) | 0.03 | 0 |
| LKT_s_Eubacterium_pyruvativorans                    | 0.0323     | 1.0328 (0.897-1.19)   | 0.65 | 0.49 | -0.376 | 0.6869 (0.424-1.11)   | 0.13 | 0 |
| LKT_s_Streptococcus_anginosus                       | 0.00948    | 1.0095 (0.911-1.12)   | 0.86 | 0.56 | -0.376 | 0.6868 (0.265-1.78)   | 0.44 | 0 |
| LKT_s_Coproccoccus_Unclassified                     | -0.136     | 0.87293 (0.773-0.986) | 0.03 | 0.21 | -0.379 | 0.6846 (0.45-1.04)    | 0.08 | 1 |
| LKT_s_Butyricoccus_Unclassified                     | 0.0847     | 1.0884 (0.946-1.25)   | 0.24 | 0.32 | -0.385 | 0.68079 (0.473-0.981) | 0.04 | 0 |
| LKT_Unclassified                                    | 0.266      | 1.305 (0.86-1.98)     | 0.21 | 0.32 | -0.386 | 0.68006 (0.315-1.47)  | 0.33 | 0 |
| LKT_s_Candidatus_Methanomassiliococcus_intestinalis | -0.0432    | 0.95771 (0.83-1.11)   | 0.56 | 0.48 | -0.386 | 0.67979 (0.253-1.82)  | 0.44 | 1 |
| LKT_g_Blaulia                                       | -0.266     | 0.76658 (0.632-0.93)  | 0.01 | 0.08 | -0.388 | 0.67846 (0.452-1.02)  | 0.06 | 1 |
| LKT_d_Eukaryota                                     | 0.153      | 1.165 (0.978-1.39)    | 0.09 | 0.23 | -0.401 | 0.66941 (0.485-0.924) | 0.01 | 0 |
| LKT_s_Massiliistercora_timonensis                   | 0.0332     | 1.0338 (0.915-1.17)   | 0.59 | 0.48 | -0.408 | 0.66489 (0.476-0.928) | 0.02 | 0 |
| LKT_s_Butyrvibrio_crossotus                         | 0.0954     | 1.1001 (0.971-1.25)   | 0.13 | 0.27 | -0.444 | 0.64124 (0.41-1)      | 0.05 | 0 |

|                                         |          |                      |      |      |        |                      |      |   |
|-----------------------------------------|----------|----------------------|------|------|--------|----------------------|------|---|
| LKT_f_Ruminococcaceae                   | 0.208    | 1.2312 (0.894-1.7)   | 0.20 | 0.32 | -0.467 | 0.62715 (0.336-1.17) | 0.14 | 0 |
| LKT_s_Bifidobacterium_pseudocatenulatum | 0.00439  | 1.0044 (0.917-1.1)   | 0.93 | 0.58 | -0.483 | 0.61685 (0.371-1.02) | 0.06 | 0 |
| LKT_s_Eubacterium_ruminantium           | 0.0578   | 1.0595 (0.943-1.19)  | 0.33 | 0.39 | -0.487 | 0.6146 (0.379-0.997) | 0.05 | 0 |
| LKT_s_Clostridioides_difficile          | -0.067   | 0.9352 (0.769-1.14)  | 0.50 | 0.47 | -0.502 | 0.60531 (0.344-1.07) | 0.08 | 1 |
| LKT_o_Clostridiales                     | -0.137   | 0.87171 (0.631-1.2)  | 0.41 | 0.42 | -0.548 | 0.5783 (0.143-2.34)  | 0.44 | 1 |
| LKT_s_Denitrobacterium_detoxificans     | -0.00796 | 0.99207 (0.905-1.09) | 0.87 | 0.56 | -0.61  | 0.54333 (0.165-1.79) | 0.32 | 1 |
| LKT_s_Lactobacillus_paracasei           | 0.115    | 1.122 (1.03-1.22)    | 0.01 | 0.11 | -0.813 | 0.44365 (0.137-1.44) | 0.18 | 0 |
| LKT_s_Enorma_phocaeensis                | -0.0342  | 0.96642 (0.847-1.1)  | 0.61 | 0.49 | -0.866 | 0.42048 (0.127-1.39) | 0.16 | 1 |
| LKT_s_Lactobacillus_vaginalis           | 0.0286   | 1.029 (0.924-1.15)   | 0.60 | 0.49 | -1.1   | 0.33424 (0.067-1.67) | 0.18 | 0 |
| LKT_s_Bacteroides_phage_crAss001        | -0.18    | 0.83541 (0.679-1.03) | 0.09 | 0.23 | -8.93  | 0.0001329 (0-Inf)    | 1.00 | 1 |
| LKT_s_Methanosphaera_stadtmanae         | 0.0669   | 1.0692 (0.958-1.19)  | 0.23 | 0.32 | -9.05  | 0.00011742 (0-Inf)   | 1.00 | 0 |
| LKT_g_Methanosphaera                    | 0.0738   | 1.0766 (0.931-1.24)  | 0.32 | 0.38 | -11.1  | 1.5416e-05 (0-Inf)   | 1.00 | 0 |
| LKT_s_Propionibacterium_freudenreichii  | -0.045   | 0.95603 (0.856-1.07) | 0.43 | 0.43 | -11.6  | 9.4816e-06 (0-Inf)   | 1.00 | 1 |
| LKT_s_Mogibacterium_pumilum             | -0.147   | 0.86325 (0.736-1.01) | 0.07 | 0.22 | -16.8  | 4.8415e-08 (0-Inf)   | 1.00 | 1 |
| LKT_s_Cryptobacterium_curtum            | 0.0391   | 1.0399 (0.945-1.14)  | 0.43 | 0.43 | -17.8  | 1.7907e-08 (0-Inf)   | 1.00 | 0 |
| LKT_g_Mogibacterium                     | -0.0295  | 0.97089 (0.842-1.12) | 0.69 | 0.50 | -18    | 1.5033e-08 (0-Inf)   | 1.00 | 1 |

**Abbreviations:**

LKT = Last Known Taxon

HR = Hazard Ratio

95% CI = 95% Confidence Interval

p-value = Wald test two-tailed p-value

Same HR direction in two cohorts: 0=No; 1=Yes
